# Supplementary material
Source: publisher site journal article supplement (https://www.spandidos-publications.com/3403/downloadSupplementary)
Supplement: Supplementary file 1 [file downloadSupplementary]

## Sheet: Table SI
Table S1. Differentially expressed circRNAs in GSE101586 (P-value<0.05 and |LogFC|≥1.2)
ID	Adjusted P-value	P-value	t	B	logFC	SPOT_ID
ASCRP002384	0.606	0.002602	3.80963	-4.04	2.65458	hsa_circRNA_102049
ASCRP002386	0.606	0.007278	3.24261	-4.14	2.56727	hsa_circRNA_102051
ASCRP004099	0.606	0.001979	3.96302	-4.02	2.5138	hsa_circRNA_103809
ASCRP002932	0.606	0.023568	2.60195	-4.27	2.45092	hsa_circRNA_102619
ASCRP004540	0.606	0.008187	3.17835	-4.15	2.4507	hsa_circRNA_104270
ASCRP001207	0.606	0.005301	3.41602	-4.11	1.89814	hsa_circRNA_100833
ASCRP002559	0.588	0.00016	5.45776	-3.84	1.66934	hsa_circRNA_102231
ASCRP000389	0.606	0.021638	2.64871	-4.26	1.55349	hsa_circRNA_002172
ASCRP001208	0.606	0.016906	2.78343	-4.23	1.49161	hsa_circRNA_100834
ASCRP002369	0.606	0.008214	3.17654	-4.15	1.48041	hsa_circRNA_102034
ASCRP003890	0.606	0.006373	3.31515	-4.13	1.4661	hsa_circRNA_103595
ASCRP001942	0.606	0.005599	3.38603	-4.12	1.46022	hsa_circRNA_101592
ASCRP004753	0.606	0.0107	3.03254	-4.18	1.44282	hsa_circRNA_104499
ASCRP001453	0.606	0.028481	2.498	-4.29	1.39423	hsa_circRNA_101085
ASCRP003646	0.606	0.005769	3.36961	-4.12	1.39384	hsa_circRNA_103348
ASCRP001007	0.606	0.03837	2.33324	-4.33	1.38995	hsa_circRNA_100633
ASCRP001726	0.606	0.041625	2.2879	-4.34	1.34081	hsa_circRNA_101367
ASCRP004267	0.606	0.017903	2.75221	-4.24	1.32469	hsa_circRNA_103987
ASCRP000390	0.606	0.02214	2.63616	-4.26	1.26782	hsa_circRNA_002178
ASCRP001846	0.606	0.039573	2.31607	-4.33	1.26725	hsa_circRNA_101495
ASCRP000535	0.606	0.01096	3.01943	-4.18	1.25105	hsa_circRNA_100146
ASCRP003427	0.606	0.018803	2.72543	-4.24	1.2495	hsa_circRNA_103123
ASCRP000140	0.606	0.03011	-2.46737	-4.3	-1.23507	hsa_circRNA_000864
ASCRP003437	0.606	0.01061	-3.03712	-4.18	-1.24893	hsa_circRNA_103134
ASCRP000167	0.606	0.011159	-3.00967	-4.19	-1.29063	hsa_circRNA_000963
ASCRP002380	0.606	0.021288	-2.65764	-4.26	-1.29969	hsa_circRNA_102045
ASCRP005260	0.606	0.006073	-3.34154	-4.12	-1.32711	hsa_circRNA_105013
ASCRP000302	0.606	0.027511	-2.51705	-4.29	-1.32785	hsa_circRNA_001587
ASCRP001576	0.606	0.000788	-4.49069	-3.95	-1.32894	hsa_circRNA_101213
ASCRP000253	0.606	0.015088	-2.84543	-4.22	-1.3675	hsa_circRNA_001350
ASCRP001643	0.606	0.006596	-3.29632	-4.13	-1.37248	hsa_circRNA_101282
ASCRP004605	0.606	0.001318	-4.19326	-3.99	-1.44889	hsa_circRNA_104342
ASCRP001667	0.606	0.044118	-2.25543	-4.35	-1.49911	hsa_circRNA_101308
ASCRP002381	0.606	0.029359	-2.48128	-4.3	-1.51818	hsa_circRNA_102046
ASCRP001034	0.606	0.007575	-3.22076	-4.15	-1.58187	hsa_circRNA_100660
ASCRP004767	0.588	0.000301	-5.06537	-3.88	-1.76043	hsa_circRNA_104513
ASCRP002761	0.606	0.037986	-2.33883	-4.33	-1.78724	hsa_circRNA_102442
ASCRP004399	0.588	0.000399	-4.89442	-3.9	-1.81001	hsa_circRNA_104126
ASCRP000779	0.606	0.013596	-2.90211	-4.21	-1.81839	hsa_circRNA_100395

## Sheet: Table S2
Table SII. miRNAs that may target circTADA2A, predicted by Cicular RNA Interactome
circRNA	circRNA (top) - miRNA (bottom) pairing	Site type	circRNA start	circRNA end	3' pairing	Local AU	Position	TA	SPS	Context+ score	Context+ score percentile
Mirbase ID
hsa_circ_0043278 (5' ... 3')	AGACCAAGGAGGAGU---GUGAGAAG	7mer-1a	137	143	-0.009	0.028	-0.038	0.001	-0.021	-0.113	86
	||||| ||||||
hsa-miR-1229 (3' ... 5')	GACACCCUCCCGUCACCACUCUC
hsa_circ_0043278 (5' ... 3')	AAGCACUAUAUGAAGCAUUUCAU	7mer-m8	157	163	0.021	-0.009	-0.049	0.031	0.068	-0.058	94
	|||||||
hsa-miR-203 (3' ... 5')	GAUCACCAGGAUUUGUAAAGUG
hsa_circ_0043278 (5' ... 3')	CUGACACAGCCAUUCCAUUUCAC	7mer-m8	242	248	0.003	0.031	-0.061	0.031	0.068	-0.048	94
	|||||||
hsa-miR-203 (3' ... 5')	GAUCACCAGGAUUUGUAAAGUG
hsa_circ_0043278 (5' ... 3')	AAGGAGGAGUGUGAGAAGCACUA	8mer-1a	142	149	0.024	0.021	-0.089	-0.008	0.001	-0.298	98
	|||||||
hsa-miR-520f (3' ... 5')	UUGGGAGAUUUUCCUUCGUGAA
hsa_circ_0043278 (5' ... 3')	GAUUUUCCUGUCCUUGAUCCCAG	7mer-m8	22	28	0.003	0.009	-0.059	-0.011	-0.04	-0.218	93
	|||||||
hsa-miR-450b-3p (3' ... 5')	AUACCUACGUUUUACUAGGGUU
hsa_circ_0043278 (5' ... 3')	GAUUUUCCUGUCCUUGAUCCCAG	7mer-m8	22	28	0.003	0.009	-0.059	-0.011	-0.04	-0.218	93
	|||||||
hsa-miR-769-3p (3' ... 5')	UUGGUUCUGGGGCCUCUAGGGUC
hsa_circ_0043278 (5' ... 3')	AUCCCAGCUGGACUGCUCAAGAA	8mer-1a	38	45	0.003	0.062	-0.105	0.007	0.019	-0.261	97
	|||||||
hsa-miR-526b (3' ... 5')	UGUCUUUCACGAAGGGAGUUCUC
hsa_circ_0043278 (5' ... 3')	GAUUUUCCUGUCCUUGAUCCCAG	7mer-1a	22	28	0.001	0.022	-0.048	-0.038	-0.058	-0.195	90
	||||||
hsa-miR-638 (3' ... 5')	UCCGGCGGUGGGCGGGCGCUAGGGA

## Sheet: Table S3
Table S3. Top 32 downregulated miRNAs in GSE74190 (filtration citeria, p value < 0.05 and |LogFC| ≥ 1.2)
ID	adj.P.Val	P.Value	t	B	logFC	miRNA_ID
hsa-miR-451	1.03e-27	7.49e-30	-15.4232	57.3612	-4.67434	hsa-miR-451
hsa-miR-144	4.92e-33	1.2e-35	-18.143	70.629	-4.64319	hsa-miR-144
hsa-miR-486-5p	1.03e-27	6.85e-30	-15.4409	57.4506	-3.71705	hsa-miR-486-5p
hsa-miR-338-3p	1.42e-14	4.33e-16	-9.464	25.8476	-2.93862	hsa-miR-338-3p
hsa-miR-126	1.55e-34	1.89e-37	-19.0303	74.7536	-2.84282	hsa-miR-126
hsa-miR-126*	1.72e-28	8.39e-31	-15.8571	59.5394	-2.65966	hsa-miR-126*
hsa-miR-144*	1.43e-20	2.09e-22	-12.1512	40.3026	-2.46099	hsa-miR-144*
hsa-miR-218	7.4e-26	7.21e-28	-14.5317	52.8179	-2.41243	hsa-miR-218
hsa-miR-139-5p	6.73e-24	7.38e-26	-13.6444	48.2117	-2.31753	hsa-miR-139-5p
hsa-miR-30a*	6.76e-15	1.98e-16	-9.60934	26.6263	-2.28119	hsa-miR-30a*
hsa-miR-30a	9.45e-21	1.27e-22	-12.2444	40.8011	-2.24013	hsa-miR-30a
hsa-miR-1	2.68e-12	1.01e-13	-8.44509	20.4419	-2.20134	hsa-miR-1
hsa-miR-145	4.83e-17	8.82e-19	-10.608	32.0014	-2.05762	hsa-miR-145
hsa-miR-133b	1.32e-16	2.58e-18	-10.4105	30.9368	-1.98717	hsa-miR-133b
hsa-miR-187*	8.62e-16	2.1e-17	-10.0236	28.8523	-1.95322	hsa-miR-187*
hsa-miR-143	4.8e-13	1.64e-14	-8.78754	22.246	-1.94889	hsa-miR-143
hsa-miR-145*	5.69e-14	1.8e-15	-9.19926	24.4331	-1.82285	hsa-miR-145*
hcmv-miR-UL70-3p	2.43e-08	1.6e-09	-6.55666	10.8989	-1.77683	hcmv-miR-UL70-3p
hsa-miR-497	5.8e-16	1.34e-17	-10.1062	29.2967	-1.66037	hsa-miR-497
hsa-miR-498	2.15e-15	5.75e-17	-9.83766	27.8521	-1.65667	hsa-miR-498
hsa-miR-140-3p	1.04e-18	1.64e-20	-11.3427	35.9624	-1.63274	hsa-miR-140-3p
hsa-miR-195	2.92e-15	8.17e-17	-9.77272	27.5031	-1.50403	hsa-miR-195
hsa-miR-551b	1.89e-05	2.03e-06	-5.00362	3.9202	-1.46773	hsa-miR-551b
hsa-miR-638	4.6e-08	3.19e-09	-6.41454	10.2199	-1.41758	hsa-miR-638
hsa-miR-101	3.02e-12	1.18e-13	-8.41636	20.2912	-1.40827	hsa-miR-101
hsa-miR-30b	3.75e-11	1.69e-12	-7.90938	17.6551	-1.39263	hsa-miR-30b
hsa-miR-34b	0.000131	1.68e-05	-4.49226	1.8788	-1.35126	hsa-miR-34b
hsa-miR-572	8.38e-05	1.03e-05	-4.61315	2.3479	-1.26566	hsa-miR-572
hsa-miR-150	0.000173	2.3e-05	-4.4128	1.5752	-1.23791	hsa-miR-150
hsa-miR-142-5p	3.39e-05	3.92e-06	-4.84736	3.2808	-1.23147	hsa-miR-142-5p
hsa-miR-328	2.69e-10	1.38e-11	-7.50395	15.5821	-1.22569	hsa-miR-328
hsa-miR-34c-5p	0.023	0.0052	-2.84821	-3.5295	-1.20422	hsa-miR-34c-5p

## Sheet: Table SIV
Table S4. Top 40 downregulated miRNAs in GSE19945 (filtration citeria, p value < 0.05 and |LogFC| ≥ 1.2)
ID	adj.P.Val	P.Value	t	B	logFC	miRNA_ID
A_25_P00013422	0.000157	2.61e-06	-5.58071	4.6476	-3.72669	hsa-miR-144*
A_25_P00010827	8.83e-06	1.03e-07	-6.6404	7.7518	-3.70148	hsa-miR-30a*
A_25_P00012189	0.000183	3.65e-06	-5.4717	4.3274	-3.60834	hsa-miR-144
A_25_P00012150	0.00136	6.03e-05	-4.54876	1.6452	-3.58373	hsa-miR-1
A_25_P00012396	1.11e-06	3.71e-09	-7.75571	10.9372	-3.55117	hsa-miR-338-3p
A_25_P00012216	1.6e-06	8.01e-09	-7.49367	10.2001	-3.4626	hsa-miR-126
A_25_P00012446	0.00023	4.99e-06	-5.3696	4.0278	-3.33606	hsa-miR-451
A_25_P00010600	8.83e-06	8.97e-08	-6.68617	7.8847	-3.29898	hsa-miR-126*
A_25_P00013852	8.83e-06	1.02e-07	-6.64436	7.7633	-3.01276	hsa-miR-30a
A_25_P00014063	0.00157	7.84e-05	-4.46117	1.3955	-2.86376	hsa-miR-486-5p
A_25_P00012193	0.000872	3.34e-05	-4.74481	2.2081	-2.71649	hsa-miR-145
A_25_P00010769	0.000403	1.23e-05	-5.07313	3.1606	-2.63754	hsa-miR-195
A_25_P00014866	0.000572	1.91e-05	-4.92984	2.7437	-2.57293	hsa-miR-497
A_25_P00013427	0.000316	7.89e-06	-5.21954	3.5883	-2.56424	hsa-miR-145*
A_25_P00012071	0.00101	4.06e-05	-4.68073	2.0236	-2.56196	hsa-miR-139-5p
A_25_P00012183	0.00152	7.33e-05	-4.4835	1.4591	-2.54643	hsa-miR-143
A_25_P00010210	0.0023	0.000119	-4.32173	1.0007	-2.49492	hsa-miR-218
A_25_P00014894	0.0431	0.00524	-2.97439	-2.5471	-2.18915	hsa-miR-551b
A_25_P00013287	0.000403	1.16e-05	-5.09299	3.2186	-2.04448	hsa-miR-30c-2*
A_25_P00010172	0.00615	0.00039	-3.91618	-0.125	-2.03482	hsa-miR-521
A_25_P00010390	0.00136	6.34e-05	-4.53198	1.5973	-1.99083	hsa-miR-30b
A_25_P00012576	0.00136	6.16e-05	-4.54186	1.6255	-1.94359	hsa-miR-517a
A_25_P00010472	0.0567	0.00784	-2.81765	-2.9147	-1.84899	hsa-miR-99a
A_25_P00010474	0.0429	0.00515	-2.98108	-2.5312	-1.76294	hsa-miR-100
A_25_P00015352	0.0148	0.00131	-3.48885	-1.2637	-1.74656	hsa-miR-517c
A_25_P00012611	0.00767	0.00055	-3.79648	-0.4495	-1.72913	hsa-miR-522
A_25_P00012274	0.0104	0.00084	-3.6477	-0.8471	-1.69715	hsa-miR-29c
A_25_P00013418	0.0104	0.000853	-3.64218	-0.8617	-1.68123	hsa-miR-143*
A_25_P00010607	0.00517	0.000293	-4.01477	0.1451	-1.6251	hsa-miR-140-5p
A_25_P00012177	0.0079	0.000603	-3.76414	-0.5365	-1.57935	hsa-miR-140-3p
A_25_P00010402	0.006	0.00037	-3.93424	-0.0757	-1.57851	hsa-miR-638
A_25_P00013893	0.0676	0.0105	-2.70348	-3.1746	-1.55493	hsa-miR-199b-5p
A_25_P00011097	0.038633	0.00393	-3.08456	-2.2818	-1.54323	hsa-miR-572
A_25_P00010981	0.038733	0.00404	-3.07365	-2.3083	-1.53747	hsa-miR-135a
A_25_P00015296	0.007896	0.000597	-3.76778	-0.5267	-1.52961	hsa-miR-30d
A_25_P00012130	0.038733	0.00416	-3.06239	-2.3356	-1.49337	hsa-miR-223
A_25_P00012002	0.007439	0.000519	-3.81704	-0.3941	-1.47438	hsa-miR-26b
A_25_P00013883	0.007439	0.000521	-3.81555	-0.3981	-1.474	hsa-miR-30c
A_25_P00010980	0.061143	0.00897	-2.76468	-3.0362	-1.47375	hsa-miR-125b
A_25_P00010687	0.011313	0.000943	-3.60663	-0.9556	-1.4454	hsa-miR-498

## Sheet: Table S5
Table S5. Predicted targeted genes of miR-638 by an online software Targetscan V2.0
Target gene	Representative transcript	Gene name	3P-seq tags + 5	Total sites	8mer sites	7mer-m8 sites	7mer-A1 sites	6mer sites	Representative miRNA	Cumulative weighted context++ score	Total context++ score	Aggregate PCT
SLC25A23	ENST00000301454.4	solute carrier family 25 (mitochondrial carrier; phosphate carrier), member 23	5	9	0	1	8	7	hsa-miR-638	-1.44	-1.44	N/A
GRK1	ENST00000335678.6	G protein-coupled receptor kinase 1	5	5	0	0	5	0	hsa-miR-638	-0.93	-0.93	N/A
CELA3A	ENST00000290122.3	chymotrypsin-like elastase family, member 3A	5	1	1	0	0	0	hsa-miR-638	-0.92	-0.92	N/A
CELA3B	ENST00000337107.6	chymotrypsin-like elastase family, member 3B	5	1	1	0	0	0	hsa-miR-638	-0.9	-0.9	N/A
HIST2H4A	ENST00000610125.1	histone cluster 2, H4a	5	1	1	0	0	0	hsa-miR-638	-0.87	-0.87	N/A
FAM222B	ENST00000582266.1	family with sequence similarity 222, member B	100	2	1	0	1	3	hsa-miR-638	-0.82	-0.87	N/A
STARD10	ENST00000543304.1	StAR-related lipid transfer (START) domain containing 10	130	1	1	0	0	1	hsa-miR-638	-0.79	-0.85	N/A
NKX2-5	ENST00000424406.2	NK2 homeobox 5	47	2	1	1	0	1	hsa-miR-638	-0.77	-0.88	N/A
AC107021.1	ENST00000422482.1	HCG1786590; PRO2533; Uncharacterized protein	5	1	1	0	0	1	hsa-miR-638	-0.77	-0.77	N/A
FGF23	ENST00000237837.1	fibroblast growth factor 23	5	3	1	0	2	0	hsa-miR-638	-0.76	-0.76	N/A
FOSB	ENST00000592811.1	FBJ murine osteosarcoma viral oncogene homolog B	11	3	0	1	2	0	hsa-miR-638	-0.76	-0.76	N/A
HIST2H4B	ENST00000392932.4	histone cluster 2, H4b	5	1	1	0	0	0	hsa-miR-638	-0.75	-0.75	N/A
TPRX1	ENST00000322175.3	tetra-peptide repeat homeobox 1	5	1	0	0	1	0	hsa-miR-638	-0.75	-0.75	N/A
HOXA9	ENST00000396345.1	homeobox A9	151	1	1	0	0	0	hsa-miR-638	-0.72	-0.72	N/A
NKIRAS2	ENST00000462043.2	NFKB inhibitor interacting Ras-like 2	9685	1	1	0	0	0	hsa-miR-638	-0.72	-0.72	N/A
ZNF275	ENST00000370251.3	zinc finger protein 275	465	4	0	1	3	2	hsa-miR-638	-0.69	-0.7	N/A
KLF7	ENST00000423015.1	Kruppel-like factor 7 (ubiquitous)	737	3	1	0	2	0	hsa-miR-638	-0.65	-0.66	N/A
RERGL	ENST00000229002.2	RERG/RAS-like	17	1	1	0	0	0	hsa-miR-638	-0.63	-0.63	N/A
TNFRSF1B	ENST00000376259.3	tumor necrosis factor receptor superfamily, member 1B	243	3	0	0	3	0	hsa-miR-638	-0.62	-0.62	N/A
SUMF1	ENST00000272902.5	sulfatase modifying factor 1	1341	1	1	0	0	0	hsa-miR-638	-0.62	-0.62	N/A
SOX2	ENST00000325404.1	SRY (sex determining region Y)-box 2	506	1	1	0	0	0	hsa-miR-638	-0.61	-0.61	N/A
KCNA5	ENST00000252321.3	potassium voltage-gated channel, shaker-related subfamily, member 5	5	2	0	1	1	0	hsa-miR-638	-0.6	-0.6	N/A
FBXO2	ENST00000354287.4	F-box protein 2	767	1	1	0	0	0	hsa-miR-638	-0.59	-0.59	N/A
LTBP2	ENST00000261978.4	latent transforming growth factor beta binding protein 2	1616	1	1	0	0	1	hsa-miR-638	-0.55	-0.55	N/A
FEV	ENST00000295727.1	FEV (ETS oncogene family)	5	1	1	0	0	0	hsa-miR-638	-0.55	-0.55	N/A
PBXIP1	ENST00000368465.1	pre-B-cell leukemia homeobox interacting protein 1	1080	2	0	0	2	0	hsa-miR-638	-0.54	-0.55	N/A
SLC46A3	ENST00000266943.6	solute carrier family 46, member 3	5	1	1	0	0	1	hsa-miR-638	-0.54	-0.54	N/A
LMBR1L	ENST00000267102.8	limb development membrane protein 1-like	346	2	0	0	2	0	hsa-miR-638	-0.54	-0.54	N/A
PLVAP	ENST00000252590.4	plasmalemma vesicle associated protein	5	2	0	1	1	0	hsa-miR-638	-0.53	-0.53	N/A
LY6E	ENST00000517503.1	lymphocyte antigen 6 complex, locus E	342	2	0	1	1	0	hsa-miR-638	-0.53	-0.53	N/A
ELP5	ENST00000574993.1	elongator acetyltransferase complex subunit 5	123	2	0	0	2	1	hsa-miR-638	-0.53	-0.55	N/A
GAMT	ENST00000252288.2	guanidinoacetate N-methyltransferase	12541	2	0	0	2	0	hsa-miR-638	-0.53	-0.53	N/A
PRR26	ENST00000441152.2	proline rich 26	5	1	1	0	0	0	hsa-miR-638	-0.52	-0.52	N/A
GNPDA1	ENST00000311337.6	glucosamine-6-phosphate deaminase 1	1130	2	0	1	1	0	hsa-miR-638	-0.52	-0.53	N/A
RPA1	ENST00000254719.5	replication protein A1, 70kDa	2834	1	1	0	0	0	hsa-miR-638	-0.51	-0.51	N/A
GPSM3	ENST00000487761.1	G-protein signaling modulator 3	125	2	0	1	1	0	hsa-miR-638	-0.51	-0.51	N/A
LRRD1	ENST00000343318.5	leucine-rich repeats and death domain containing 1	9	1	1	0	0	0	hsa-miR-638	-0.51	-0.51	N/A
TP53INP2	ENST00000374810.3	tumor protein p53 inducible nuclear protein 2	12	2	0	2	0	1	hsa-miR-638	-0.5	-0.5	N/A
CCNY	ENST00000374706.1	cyclin Y	672	2	0	1	1	1	hsa-miR-638	-0.5	-0.53	N/A
GPR116	ENST00000283296.7	G protein-coupled receptor 116	5	1	1	0	0	0	hsa-miR-638	-0.5	-0.5	N/A
AL117190.3	ENST00000599197.1	Esophagus cancer-related gene-2 interaction susceptibility protein; Uncharacterized protein	30	2	0	2	0	0	hsa-miR-638	-0.49	-0.55	N/A
MYLIP	ENST00000349606.4	myosin regulatory light chain interacting protein	452	1	1	0	0	0	hsa-miR-638	-0.49	-0.5	N/A
WDR47	ENST00000400794.3	WD repeat domain 47	185	1	1	0	0	0	hsa-miR-638	-0.49	-0.49	N/A
BLOC1S3	ENST00000433642.2	biogenesis of lysosomal organelles complex-1, subunit 3	182	1	1	0	0	0	hsa-miR-638	-0.49	-0.51	N/A
TTPAL	ENST00000372906.2	tocopherol (alpha) transfer protein-like	265	3	0	0	3	0	hsa-miR-638	-0.49	-0.51	N/A
RAB3B	ENST00000371655.3	RAB3B, member RAS oncogene family	611	2	1	0	1	3	hsa-miR-638	-0.49	-0.6	N/A
ZNF488	ENST00000494156.1	zinc finger protein 488	61	1	1	0	0	0	hsa-miR-638	-0.49	-0.49	N/A
RPS15A	ENST00000576436.1	ribosomal protein S15a	24	2	0	0	2	1	hsa-miR-638	-0.49	-0.49	N/A
FAM73B	ENST00000277475.5	family with sequence similarity 73, member B	651	1	1	0	0	0	hsa-miR-638	-0.48	-0.48	N/A
FAM212B	ENST00000357260.5	family with sequence similarity 212, member B	211	2	1	0	1	1	hsa-miR-638	-0.47	-0.62	N/A
PLD6	ENST00000321560.3	phospholipase D family, member 6	280	1	1	0	0	0	hsa-miR-638	-0.47	-0.47	N/A
SERPINF2	ENST00000382061.4	serpin peptidase inhibitor, clade F (alpha-2 antiplasmin, pigment epithelium derived factor), member 2	2334	2	0	0	2	0	hsa-miR-638	-0.44	-0.45	N/A
NPAS4	ENST00000311034.2	neuronal PAS domain protein 4	5	1	1	0	0	0	hsa-miR-638	-0.44	-0.44	N/A
KDELR1	ENST00000330720.2	KDEL (Lys-Asp-Glu-Leu) endoplasmic reticulum protein retention receptor 1	675	2	0	0	2	0	hsa-miR-638	-0.44	-0.55	N/A
CDK2	ENST00000266970.4	cyclin-dependent kinase 2	6789	2	0	0	2	1	hsa-miR-638	-0.44	-0.44	N/A
CD4	ENST00000011653.4	CD4 molecule	5	2	0	0	2	2	hsa-miR-638	-0.43	-0.43	N/A
SMG9	ENST00000270066.6	SMG9 nonsense mediated mRNA decay factor	401	1	1	0	0	0	hsa-miR-638	-0.43	-0.43	N/A
HLF	ENST00000226067.5	hepatic leukemia factor	15	2	1	0	1	0	hsa-miR-638	-0.43	-0.5	N/A
LMCD1	ENST00000157600.3	LIM and cysteine-rich domains 1	1023	2	0	0	2	0	hsa-miR-638	-0.43	-0.43	N/A
PTMS	ENST00000389462.4	parathymosin	3140	1	0	0	1	2	hsa-miR-638	-0.42	-0.42	N/A
CTD-2207O23.12	ENST00000599312.1	Uncharacterized protein	32	2	0	0	2	1	hsa-miR-638	-0.42	-0.7	N/A
RNF182	ENST00000488300.1	ring finger protein 182	1122	1	1	0	0	1	hsa-miR-638	-0.42	-0.42	N/A
MAPK14	ENST00000229795.3	mitogen-activated protein kinase 14	1191	2	0	0	2	0	hsa-miR-638	-0.42	-0.42	N/A
ITLN1	ENST00000326245.3	intelectin 1 (galactofuranose binding)	5	1	0	0	1	0	hsa-miR-638	-0.41	-0.41	N/A
CTF1	ENST00000279804.2	cardiotrophin 1	25	1	1	0	0	0	hsa-miR-638	-0.41	-0.41	N/A
AP3M2	ENST00000174653.3	adaptor-related protein complex 3, mu 2 subunit	792	1	1	0	0	0	hsa-miR-638	-0.41	-0.41	N/A
MRPS18B	ENST00000506373.2	mitochondrial ribosomal protein S18B	1667	2	0	0	2	0	hsa-miR-638	-0.41	-0.41	N/A
KRTAP13-4	ENST00000334068.2	keratin associated protein 13-4	5	1	0	0	1	0	hsa-miR-638	-0.41	-0.41	N/A
KRT14	ENST00000167586.6	keratin 14	5	1	0	0	1	1	hsa-miR-638	-0.4	-0.4	N/A
OR4A5	ENST00000319760.6	olfactory receptor, family 4, subfamily A, member 5	5	1	0	0	1	0	hsa-miR-638	-0.4	-0.4	N/A
TVP23C-CDRT4	ENST00000522212.2	TVP23C-CDRT4 readthrough	109	2	0	0	2	0	hsa-miR-638	-0.4	-0.4	N/A
SLC39A4	ENST00000276833.5	solute carrier family 39 (zinc transporter), member 4	5	1	0	0	1	0	hsa-miR-638	-0.4	-0.4	N/A
CPNE2	ENST00000290776.8	copine II	1469	1	0	1	0	0	hsa-miR-638	-0.39	-0.39	N/A
CCL11	ENST00000305869.3	chemokine (C-C motif) ligand 11	12	1	0	1	0	0	hsa-miR-638	-0.39	-0.39	N/A
KLK15	ENST00000301421.2	kallikrein-related peptidase 15	5	1	0	1	0	0	hsa-miR-638	-0.39	-0.39	N/A
FXYD7	ENST00000270310.2	FXYD domain containing ion transport regulator 7	5	1	0	1	0	0	hsa-miR-638	-0.39	-0.39	N/A
RDH8	ENST00000591589.1	retinol dehydrogenase 8 (all-trans)	5	1	0	1	0	0	hsa-miR-638	-0.39	-0.39	N/A
C1orf123	ENST00000294360.4	chromosome 1 open reading frame 123	558	1	1	0	0	0	hsa-miR-638	-0.38	-0.62	N/A
RNASE2	ENST00000304625.2	ribonuclease, RNase A family, 2 (liver, eosinophil-derived neurotoxin)	5	1	0	0	1	0	hsa-miR-638	-0.38	-0.38	N/A
TCERG1L	ENST00000368642.4	transcription elongation regulator 1-like	5	1	0	1	0	0	hsa-miR-638	-0.38	-0.38	N/A
MLXIPL	ENST00000434326.1	MLX interacting protein-like	58	2	0	0	2	0	hsa-miR-638	-0.38	-0.38	N/A
TCHP	ENST00000405876.4	trichoplein, keratin filament binding	140	2	0	0	2	1	hsa-miR-638	-0.38	-0.4	N/A
SHPK	ENST00000225519.3	sedoheptulokinase	40	2	0	0	2	0	hsa-miR-638	-0.37	-0.37	N/A
RNASE3	ENST00000304639.3	ribonuclease, RNase A family, 3	5	1	0	0	1	0	hsa-miR-638	-0.37	-0.37	N/A
P2RY8	ENST00000381297.4	purinergic receptor P2Y, G-protein coupled, 8	5	2	0	1	1	0	hsa-miR-638	-0.37	-0.37	N/A
CELF5	ENST00000541430.2	CUGBP, Elav-like family member 5	5	3	0	2	1	0	hsa-miR-638	-0.37	-0.37	N/A
THAP7	ENST00000215742.4	THAP domain containing 7	769	1	0	0	1	0	hsa-miR-638	-0.37	-0.37	N/A
MINOS1	ENST00000322753.6	mitochondrial inner membrane organizing system 1	287	1	1	0	0	1	hsa-miR-638	-0.37	-0.46	N/A
PLD1	ENST00000342215.6	phospholipase D1, phosphatidylcholine-specific	128	2	0	1	1	0	hsa-miR-638	-0.37	-0.38	N/A
NCR3LG1	ENST00000338965.4	natural killer cell cytotoxicity receptor 3 ligand 1	214	3	0	0	3	1	hsa-miR-638	-0.36	-0.36	N/A
WBP1L	ENST00000369889.4	WW domain binding protein 1-like	5	1	0	0	1	0	hsa-miR-638	-0.36	-0.36	N/A
HSD11B2	ENST00000326152.5	hydroxysteroid (11-beta) dehydrogenase 2	29	1	0	1	0	0	hsa-miR-638	-0.36	-0.36	N/A
EFCAB1	ENST00000433756.1	EF-hand calcium binding domain 1	5	1	0	1	0	1	hsa-miR-638	-0.36	-0.36	N/A
LCE1A	ENST00000335123.2	late cornified envelope 1A	5	1	0	0	1	1	hsa-miR-638	-0.36	-0.36	N/A
SMARCE1	ENST00000377808.4	SWI/SNF related, matrix associated, actin dependent regulator of chromatin, subfamily e, member 1	252	2	0	0	2	1	hsa-miR-638	-0.36	-0.48	N/A
SEL1L	ENST00000336735.4	sel-1 suppressor of lin-12-like (C. elegans)	1271	1	1	0	0	0	hsa-miR-638	-0.36	-0.39	N/A
PROP1	ENST00000308304.2	PROP paired-like homeobox 1	5	1	0	0	1	1	hsa-miR-638	-0.36	-0.36	N/A
HES2	ENST00000377834.4	hairy and enhancer of split 2 (Drosophila)	5	2	0	0	2	0	hsa-miR-638	-0.36	-0.36	N/A
NOG	ENST00000332822.4	noggin	107	1	0	1	0	0	hsa-miR-638	-0.36	-0.36	N/A
BOK	ENST00000318407.3	BCL2-related ovarian killer	588	2	0	0	2	0	hsa-miR-638	-0.36	-0.36	N/A
TMEM182	ENST00000412401.2	transmembrane protein 182	69	2	0	0	2	0	hsa-miR-638	-0.36	-0.37	N/A
MFGE8	ENST00000539437.1	milk fat globule-EGF factor 8 protein	404	1	1	0	0	0	hsa-miR-638	-0.36	-0.36	N/A
BCL2L13	ENST00000418951.2	BCL2-like 13 (apoptosis facilitator)	741	2	0	0	2	0	hsa-miR-638	-0.36	-0.36	N/A
ART4	ENST00000228936.4	ADP-ribosyltransferase 4	5	2	0	0	2	1	hsa-miR-638	-0.36	-0.36	N/A
AGER	ENST00000375065.5	advanced glycosylation end product-specific receptor	7	1	0	0	1	0	hsa-miR-638	-0.36	-0.36	N/A
EVPL	ENST00000301607.3	envoplakin	9	1	0	0	1	0	hsa-miR-638	-0.35	-0.35	N/A
RGCC	ENST00000379359.3	regulator of cell cycle	1619	1	0	0	1	0	hsa-miR-638	-0.35	-0.35	N/A
TRIML1	ENST00000332517.3	tripartite motif family-like 1	5	1	0	0	1	0	hsa-miR-638	-0.35	-0.35	N/A
CIDEB	ENST00000554411.1	cell death-inducing DFFA-like effector b	26	1	0	0	1	1	hsa-miR-638	-0.35	-0.35	N/A
GOLGA7	ENST00000405786.2	golgin A7	34	1	0	0	1	0	hsa-miR-638	-0.35	-0.35	N/A
UBE2Z	ENST00000360943.5	ubiquitin-conjugating enzyme E2Z	3688	1	1	0	0	0	hsa-miR-638	-0.35	-0.35	N/A
PEPD	ENST00000244137.7	peptidase D	725	1	0	0	1	0	hsa-miR-638	-0.35	-0.35	N/A
FANK1	ENST00000368695.1	fibronectin type III and ankyrin repeat domains 1	5	1	0	0	1	0	hsa-miR-638	-0.35	-0.35	N/A
LCE3C	ENST00000333881.3	late cornified envelope 3C	5	1	0	0	1	0	hsa-miR-638	-0.35	-0.35	N/A
ZNF814	ENST00000596604.1	zinc finger protein 814	17	1	0	0	1	0	hsa-miR-638	-0.34	-0.34	N/A
C16orf98	ENST00000561916.2	chromosome 16 open reading frame 98	5	1	0	0	1	0	hsa-miR-638	-0.34	-0.34	N/A
DCTN4	ENST00000447998.2	dynactin 4 (p62)	153	2	0	0	2	0	hsa-miR-638	-0.34	-0.48	N/A
PRDM16	ENST00000511072.1	PR domain containing 16	64	1	0	0	1	2	hsa-miR-638	-0.34	-0.36	N/A
NR4A3	ENST00000330847.1	nuclear receptor subfamily 4, group A, member 3	244	1	0	1	0	2	hsa-miR-638	-0.34	-0.34	N/A
CPNE1	ENST00000352393.4	copine I	2507	1	0	0	1	0	hsa-miR-638	-0.34	-0.34	N/A
MIER3	ENST00000381226.3	mesoderm induction early response 1, family member 3	112	2	0	2	0	0	hsa-miR-638	-0.34	-0.36	N/A
KDM8	ENST00000380948.2	lysine (K)-specific demethylase 8	62	1	0	0	1	1	hsa-miR-638	-0.34	-0.34	N/A
FXYD6	ENST00000540359.1	FXYD domain containing ion transport regulator 6	42	1	0	0	1	1	hsa-miR-638	-0.34	-0.34	N/A
SH2D2A	ENST00000368198.3	SH2 domain containing 2A	21	1	0	0	1	0	hsa-miR-638	-0.34	-0.34	N/A
PPEF1	ENST00000543630.1	protein phosphatase, EF-hand calcium binding domain 1	9	1	0	0	1	1	hsa-miR-638	-0.34	-0.34	N/A
AL353791.1	ENST00000426179.1		5	1	0	0	1	1	hsa-miR-638	-0.34	-0.34	N/A
RAB37	ENST00000392610.1	RAB37, member RAS oncogene family	875	1	0	1	0	1	hsa-miR-638	-0.34	-0.34	N/A
CD274	ENST00000381573.4	CD274 molecule	351	2	0	0	2	0	hsa-miR-638	-0.33	-0.35	N/A
RP5-850E9.3	ENST00000488788.2	Uncharacterized protein	10	1	0	0	1	2	hsa-miR-638	-0.33	-0.35	N/A
PADI4	ENST00000375448.4	peptidyl arginine deiminase, type IV	5	1	0	0	1	0	hsa-miR-638	-0.33	-0.33	N/A
LRRC48	ENST00000399187.1	leucine rich repeat containing 48	5	1	0	1	0	0	hsa-miR-638	-0.33	-0.33	N/A
RNF175	ENST00000347063.4	ring finger protein 175	15	1	0	0	1	0	hsa-miR-638	-0.33	-0.33	N/A
GPC4	ENST00000370828.3	glypican 4	542	2	0	0	2	0	hsa-miR-638	-0.33	-0.44	N/A
COPZ2	ENST00000006101.4	coatomer protein complex, subunit zeta 2	429	1	0	0	1	0	hsa-miR-638	-0.33	-0.33	N/A
KRTAP17-1	ENST00000334202.3	keratin associated protein 17-1	5	1	0	0	1	0	hsa-miR-638	-0.33	-0.33	N/A
SRXN1	ENST00000381962.3	sulfiredoxin 1	10	1	0	0	1	2	hsa-miR-638	-0.32	-0.35	N/A
FAM221B	ENST00000423537.2	family with sequence similarity 221, member B	5	2	0	0	2	0	hsa-miR-638	-0.32	-0.32	N/A
SCML4	ENST00000369022.2	sex comb on midleg-like 4 (Drosophila)	10	1	0	0	1	1	hsa-miR-638	-0.32	-0.4	N/A
CCL17	ENST00000219244.4	chemokine (C-C motif) ligand 17	5	1	0	0	1	0	hsa-miR-638	-0.32	-0.32	N/A
SULT1B1	ENST00000310613.3	sulfotransferase family, cytosolic, 1B, member 1	5	2	0	0	2	0	hsa-miR-638	-0.32	-0.32	N/A
RNASEH2C	ENST00000308418.4	ribonuclease H2, subunit C	1330	1	0	1	0	1	hsa-miR-638	-0.32	-0.37	N/A
HMGA1	ENST00000347617.6	high mobility group AT-hook 1	2024	1	0	1	0	0	hsa-miR-638	-0.32	-0.32	N/A
ADD1	ENST00000398125.1	adducin 1 (alpha)	460	2	0	1	1	0	hsa-miR-638	-0.32	-0.33	N/A
DNAJC5G	ENST00000296097.3	DnaJ (Hsp40) homolog, subfamily C, member 5 gamma	5	1	0	0	1	1	hsa-miR-638	-0.32	-0.32	N/A
ENO2	ENST00000545045.2	enolase 2 (gamma, neuronal)	100	1	0	0	1	1	hsa-miR-638	-0.32	-0.32	N/A
TCP11L2	ENST00000547153.1	t-complex 11, testis-specific-like 2	29	1	0	1	0	0	hsa-miR-638	-0.32	-0.32	N/A
EFCAB10	ENST00000486180.1	EF-hand calcium binding domain 10	6	1	0	1	0	0	hsa-miR-638	-0.32	-0.37	N/A
ZNF232	ENST00000575898.1	zinc finger protein 232	176	1	0	0	1	0	hsa-miR-638	-0.32	-0.32	N/A
SPEG	ENST00000312358.7	SPEG complex locus	179	1	0	1	0	0	hsa-miR-638	-0.32	-0.32	N/A
NLE1	ENST00000586869.1	notchless homolog 1 (Drosophila)	526	1	0	0	1	1	hsa-miR-638	-0.32	-0.32	N/A
TBC1D14	ENST00000448507.1	TBC1 domain family, member 14	1583	2	0	0	2	0	hsa-miR-638	-0.32	-0.32	N/A
RCN1	ENST00000054950.3	reticulocalbin 1, EF-hand calcium binding domain	213	2	0	0	2	1	hsa-miR-638	-0.32	-0.47	N/A
EPHX2	ENST00000521400.1	epoxide hydrolase 2, cytoplasmic	6881	1	0	0	1	0	hsa-miR-638	-0.32	-0.32	N/A
CXXC1	ENST00000589940.1	CXXC finger protein 1	263	1	0	1	0	0	hsa-miR-638	-0.32	-0.32	N/A
CCR8	ENST00000414803.1	chemokine (C-C motif) receptor 8	5	1	0	0	1	0	hsa-miR-638	-0.32	-0.32	N/A
SPECC1L	ENST00000314328.9	sperm antigen with calponin homology and coiled-coil domains 1-like	3720	1	1	0	0	0	hsa-miR-638	-0.32	-0.32	N/A
PDGFB	ENST00000331163.6	platelet-derived growth factor beta polypeptide	5	1	0	0	1	2	hsa-miR-638	-0.31	-0.32	N/A
CHRNE	ENST00000293780.4	cholinergic receptor, nicotinic, epsilon (muscle)	11	1	0	0	1	1	hsa-miR-638	-0.31	-0.31	N/A
FLOT1	ENST00000376389.3	flotillin 1	809	1	0	0	1	0	hsa-miR-638	-0.31	-0.32	N/A
DUX4L2	ENST00000554376.1	double homeobox 4 like 2	5	1	0	0	1	0	hsa-miR-638	-0.31	-0.31	N/A
ISOC2	ENST00000438389.2	isochorismatase domain containing 2	1602	1	0	0	1	0	hsa-miR-638	-0.31	-0.31	N/A
TMED2	ENST00000262225.3	transmembrane emp24 domain trafficking protein 2	3025	1	0	0	1	0	hsa-miR-638	-0.31	-0.31	N/A
C7orf65	ENST00000408988.2	chromosome 7 open reading frame 65	5	1	0	0	1	1	hsa-miR-638	-0.31	-0.31	N/A
PER2	ENST00000254658.3	period circadian clock 2	106	2	0	1	1	1	hsa-miR-638	-0.31	-0.31	N/A
BIVM	ENST00000448849.2	basic, immunoglobulin-like variable motif containing	440	1	0	1	0	0	hsa-miR-638	-0.31	-0.32	N/A
CLIC5	ENST00000339561.6	chloride intracellular channel 5	21	1	1	0	0	1	hsa-miR-638	-0.31	-0.42	N/A
AC025278.1	ENST00000377296.3	Uncharacterized protein	5	1	0	0	1	2	hsa-miR-638	-0.31	-0.31	N/A
TOM1	ENST00000382034.5	target of myb1 (chicken)	309	1	1	0	0	0	hsa-miR-638	-0.31	-0.31	N/A
RSG1	ENST00000375599.3	REM2 and RAB-like small GTPase 1	29	1	0	0	1	0	hsa-miR-638	-0.31	-0.31	N/A
POMGNT1	ENST00000396420.3	protein O-linked mannose N-acetylglucosaminyltransferase 1 (beta 1,2-)	2123	1	0	1	0	0	hsa-miR-638	-0.31	-0.31	N/A
FABP7	ENST00000356535.4	fatty acid binding protein 7, brain	5	1	0	0	1	0	hsa-miR-638	-0.31	-0.31	N/A
CLDN10	ENST00000376873.3	claudin 10	7	1	0	0	1	0	hsa-miR-638	-0.31	-0.31	N/A
CPB1	ENST00000491148.1	carboxypeptidase B1 (tissue)	5	1	0	0	1	0	hsa-miR-638	-0.31	-0.31	N/A
HMCN1	ENST00000367492.2	hemicentin 1	7	2	0	0	2	0	hsa-miR-638	-0.31	-0.31	N/A
HMGN5	ENST00000358130.2	high mobility group nucleosome binding domain 5	46	2	0	0	2	0	hsa-miR-638	-0.31	-0.48	N/A
CNPY4	ENST00000262932.3	canopy FGF signaling regulator 4	24	1	0	0	1	0	hsa-miR-638	-0.31	-0.31	N/A
MARCKS	ENST00000368635.4	myristoylated alanine-rich protein kinase C substrate	188	1	0	0	1	0	hsa-miR-638	-0.31	-0.31	N/A
DIO2	ENST00000438257.4	deiodinase, iodothyronine, type II	98	1	0	0	1	1	hsa-miR-638	-0.3	-0.3	N/A
C11orf54	ENST00000528288.1	chromosome 11 open reading frame 54	47	3	0	0	3	0	hsa-miR-638	-0.3	-0.6	N/A
ANKFY1	ENST00000341657.4	ankyrin repeat and FYVE domain containing 1	969	2	0	0	2	1	hsa-miR-638	-0.3	-0.31	N/A
COQ4	ENST00000609948.1	coenzyme Q4 homolog (S. cerevisiae)	2366	1	0	0	1	0	hsa-miR-638	-0.3	-0.3	N/A
KCNB1	ENST00000371741.4	potassium voltage-gated channel, Shab-related subfamily, member 1	5	2	1	0	1	1	hsa-miR-638	-0.3	-0.3	N/A
C12orf49	ENST00000261318.3	chromosome 12 open reading frame 49	673	2	0	0	2	0	hsa-miR-638	-0.3	-0.33	N/A
HKR1	ENST00000324411.4	HKR1, GLI-Kruppel zinc finger family member	69	1	0	0	1	0	hsa-miR-638	-0.3	-0.3	N/A
LARS2	ENST00000415258.1	leucyl-tRNA synthetase 2, mitochondrial	316	2	0	0	2	0	hsa-miR-638	-0.3	-0.3	N/A
C5orf15	ENST00000231512.3	chromosome 5 open reading frame 15	988	1	0	0	1	0	hsa-miR-638	-0.3	-0.3	N/A
WFDC13	ENST00000305479.2	WAP four-disulfide core domain 13	5	1	0	0	1	0	hsa-miR-638	-0.3	-0.3	N/A
AHCYL1	ENST00000369799.5	adenosylhomocysteinase-like 1	1279	1	0	0	1	1	hsa-miR-638	-0.3	-0.3	N/A
KCNJ1	ENST00000392665.2	potassium inwardly-rectifying channel, subfamily J, member 1	9	1	0	0	1	1	hsa-miR-638	-0.3	-0.3	N/A
CAPN10	ENST00000404753.3	calpain 10	279	1	0	0	1	1	hsa-miR-638	-0.3	-0.3	N/A
IFNG	ENST00000229135.3	interferon, gamma	5	1	0	0	1	0	hsa-miR-638	-0.3	-0.3	N/A
C3orf35	ENST00000426078.1	chromosome 3 open reading frame 35	14	1	0	0	1	0	hsa-miR-638	-0.3	-0.3	N/A
MLKL	ENST00000306247.7	mixed lineage kinase domain-like	44	1	0	0	1	0	hsa-miR-638	-0.3	-0.3	N/A
ABAT	ENST00000569156.1	4-aminobutyrate aminotransferase	66	1	0	0	1	2	hsa-miR-638	-0.3	-0.31	N/A
INTS9	ENST00000521022.1	integrator complex subunit 9	85	1	0	0	1	0	hsa-miR-638	-0.3	-0.3	N/A
CERCAM	ENST00000372842.1	cerebral endothelial cell adhesion molecule	184	1	0	0	1	1	hsa-miR-638	-0.3	-0.3	N/A
TAF9B	ENST00000341864.5	TAF9B RNA polymerase II, TATA box binding protein (TBP)-associated factor, 31kDa	19	1	0	0	1	0	hsa-miR-638	-0.3	-0.3	N/A
STX3	ENST00000535361.1	syntaxin 3	564	2	0	0	2	1	hsa-miR-638	-0.3	-0.34	N/A
GAP43	ENST00000305124.6	growth associated protein 43	5	1	0	0	1	0	hsa-miR-638	-0.29	-0.29	N/A
WEE2	ENST00000397541.2	WEE1 homolog 2 (S. pombe)	5	1	0	0	1	0	hsa-miR-638	-0.29	-0.29	N/A
LIX1L	ENST00000369308.3	Lix1 homolog (mouse)-like	695	1	0	0	1	1	hsa-miR-638	-0.29	-0.36	N/A
RENBP	ENST00000412763.1	renin binding protein	5	1	0	1	0	0	hsa-miR-638	-0.29	-0.29	N/A
CCDC22	ENST00000376227.3	coiled-coil domain containing 22	609	1	0	0	1	0	hsa-miR-638	-0.29	-0.29	N/A
CTD-2370N5.3	ENST00000578584.1		5	1	0	0	1	0	hsa-miR-638	-0.29	-0.29	N/A
DUX4L3	ENST00000557656.2	double homeobox 4 like 3	5	1	0	0	1	0	hsa-miR-638	-0.29	-0.29	N/A
DUX4L7	ENST00000553820.2	double homeobox 4 like 7	5	1	0	0	1	0	hsa-miR-638	-0.29	-0.29	N/A
DUX4	ENST00000554285.2	double homeobox 4	5	1	0	0	1	0	hsa-miR-638	-0.29	-0.29	N/A
DUX4L4	ENST00000554637.2	double homeobox 4 like 4	5	1	0	0	1	0	hsa-miR-638	-0.29	-0.29	N/A
DUX4L6	ENST00000553722.2	double homeobox 4 like 6	5	1	0	0	1	0	hsa-miR-638	-0.29	-0.29	N/A
MAT2B	ENST00000518095.1	methionine adenosyltransferase II, beta	1901	1	0	0	1	1	hsa-miR-638	-0.29	-0.29	N/A
SERPINA6	ENST00000341584.3	serpin peptidase inhibitor, clade A (alpha-1 antiproteinase, antitrypsin), member 6	69	1	0	0	1	0	hsa-miR-638	-0.29	-0.29	N/A
SLC9A8	ENST00000361573.2	solute carrier family 9, subfamily A (NHE8, cation proton antiporter 8), member 8	474	2	0	0	2	0	hsa-miR-638	-0.29	-0.29	N/A
C7orf50	ENST00000357429.6	chromosome 7 open reading frame 50	4161	1	0	1	0	0	hsa-miR-638	-0.29	-0.29	N/A
RP11-650K20.3	ENST00000551650.1	Uncharacterized protein	5	1	0	0	1	0	hsa-miR-638	-0.29	-0.29	N/A
KRTAP5-8	ENST00000398534.3	keratin associated protein 5-8	5	1	0	0	1	0	hsa-miR-638	-0.29	-0.29	N/A
NUP214	ENST00000359428.5	nucleoporin 214kDa	452	1	0	1	0	0	hsa-miR-638	-0.29	-0.29	N/A
EBLN2	ENST00000533473.1	endogenous Bornavirus-like nucleoprotein 2	5	1	0	0	1	0	hsa-miR-638	-0.29	-0.29	N/A
UBE2G1	ENST00000396981.2	ubiquitin-conjugating enzyme E2G 1	5620	1	0	0	1	2	hsa-miR-638	-0.29	-0.3	N/A
GALNT10	ENST00000297107.6	UDP-N-acetyl-alpha-D-galactosamine:polypeptide N-acetylgalactosaminyltransferase 10 (GalNAc-T10)	3445	2	0	0	2	0	hsa-miR-638	-0.29	-0.29	N/A
GPR6	ENST00000275169.3	G protein-coupled receptor 6	5	1	0	0	1	0	hsa-miR-638	-0.29	-0.29	N/A
PAX8	ENST00000263335.7	paired box 8	11	1	0	1	0	1	hsa-miR-638	-0.29	-0.29	N/A
GRIK5	ENST00000301218.4	glutamate receptor, ionotropic, kainate 5	5	1	0	0	1	0	hsa-miR-638	-0.29	-0.29	N/A
GRAPL	ENST00000344415.4	GRB2-related adaptor protein-like	5	1	0	1	0	0	hsa-miR-638	-0.29	-0.29	N/A
DIAPH2	ENST00000324765.8	diaphanous-related formin 2	91	1	1	0	0	0	hsa-miR-638	-0.29	-0.33	N/A
SMIM21	ENST00000579022.1	small integral membrane protein 21	5	1	0	0	1	0	hsa-miR-638	-0.28	-0.28	N/A
ASGR2	ENST00000355035.5	asialoglycoprotein receptor 2	1189	1	0	0	1	0	hsa-miR-638	-0.28	-0.28	N/A
SUDS3	ENST00000397564.2	suppressor of defective silencing 3 homolog (S. cerevisiae)	224	1	1	0	0	0	hsa-miR-638	-0.28	-0.34	N/A
EZR	ENST00000337147.7	ezrin	3757	1	0	0	1	0	hsa-miR-638	-0.28	-0.28	N/A
PLIN5	ENST00000381848.3	perilipin 5	125	1	0	1	0	0	hsa-miR-638	-0.28	-0.28	N/A
ZNF618	ENST00000288466.7	zinc finger protein 618	778	2	0	0	2	0	hsa-miR-638	-0.28	-0.29	N/A
CYTIP	ENST00000264192.3	cytohesin 1 interacting protein	8	1	0	0	1	0	hsa-miR-638	-0.28	-0.28	N/A
TTI1	ENST00000373448.2	TELO2 interacting protein 1	182	1	0	1	0	0	hsa-miR-638	-0.28	-0.28	N/A
HMGCS2	ENST00000369406.3	3-hydroxy-3-methylglutaryl-CoA synthase 2 (mitochondrial)	63	1	0	0	1	0	hsa-miR-638	-0.28	-0.28	N/A
VANGL1	ENST00000355485.2	VANGL planar cell polarity protein 1	721	1	0	0	1	1	hsa-miR-638	-0.28	-0.29	N/A
ADSSL1	ENST00000330877.2	adenylosuccinate synthase like 1	116	1	0	0	1	0	hsa-miR-638	-0.28	-0.28	N/A
POU2F3	ENST00000260264.4	POU class 2 homeobox 3	5	1	0	0	1	0	hsa-miR-638	-0.28	-0.28	N/A
TMEM133	ENST00000303130.2	transmembrane protein 133	543	1	0	1	0	0	hsa-miR-638	-0.28	-0.28	N/A
TGM2	ENST00000361475.2	transglutaminase 2	731	1	0	0	1	0	hsa-miR-638	-0.28	-0.28	N/A
RASGEF1B	ENST00000509081.1	RasGEF domain family, member 1B	20	1	0	0	1	0	hsa-miR-638	-0.28	-0.28	N/A
C7orf49	ENST00000424142.1	chromosome 7 open reading frame 49	272	1	0	0	1	0	hsa-miR-638	-0.28	-0.28	N/A
RAB42	ENST00000373826.3	RAB42, member RAS oncogene family	11	2	0	1	1	1	hsa-miR-638	-0.28	-0.48	N/A
ITIH6	ENST00000218436.6	inter-alpha-trypsin inhibitor heavy chain family, member 6	5	1	0	0	1	1	hsa-miR-638	-0.28	-0.28	N/A
DENND2C	ENST00000393276.3	DENN/MADD domain containing 2C	51	2	0	0	2	0	hsa-miR-638	-0.28	-0.28	N/A
APRT	ENST00000426324.2	adenine phosphoribosyltransferase	2906	1	0	0	1	0	hsa-miR-638	-0.28	-0.28	N/A
NLRP10	ENST00000328600.2	NLR family, pyrin domain containing 10	21	1	0	0	1	0	hsa-miR-638	-0.28	-0.28	N/A
ARTN	ENST00000372359.5	artemin	18	1	0	0	1	0	hsa-miR-638	-0.28	-0.28	N/A
C1QTNF1	ENST00000392445.2	C1q and tumor necrosis factor related protein 1	74	1	0	1	0	1	hsa-miR-638	-0.28	-0.28	N/A
CDC42EP2	ENST00000279249.2	CDC42 effector protein (Rho GTPase binding) 2	449	1	0	0	1	0	hsa-miR-638	-0.28	-0.28	N/A
SHISA4	ENST00000362011.6	shisa family member 4	66	1	0	0	1	0	hsa-miR-638	-0.28	-0.28	N/A
SKP1	ENST00000353411.6	S-phase kinase-associated protein 1	416	2	0	0	2	0	hsa-miR-638	-0.28	-0.39	N/A
PGK1	ENST00000373316.4	phosphoglycerate kinase 1	7680	1	0	0	1	1	hsa-miR-638	-0.28	-0.33	N/A
PNPLA3	ENST00000216180.3	patatin-like phospholipase domain containing 3	147	2	0	0	2	0	hsa-miR-638	-0.28	-0.28	N/A
IL17RA	ENST00000319363.6	interleukin 17 receptor A	685	1	0	0	1	1	hsa-miR-638	-0.28	-0.28	N/A
MYOM3	ENST00000338909.5	myomesin 3	5	1	0	0	1	0	hsa-miR-638	-0.28	-0.28	N/A
SP2	ENST00000376741.4	Sp2 transcription factor	779	1	0	1	0	1	hsa-miR-638	-0.28	-0.28	N/A
GPX1	ENST00000419349.1	glutathione peroxidase 1	122	1	0	0	1	0	hsa-miR-638	-0.28	-0.28	N/A
LAMTOR1	ENST00000538404.1	late endosomal/lysosomal adaptor, MAPK and MTOR activator 1	1317	1	0	0	1	1	hsa-miR-638	-0.27	-0.28	N/A
ADM2	ENST00000395738.2	adrenomedullin 2	129	1	0	0	1	2	hsa-miR-638	-0.27	-0.3	N/A
STIM1	ENST00000527651.1	stromal interaction molecule 1	1672	1	0	0	1	0	hsa-miR-638	-0.27	-0.28	N/A
RP11-758M4.1	ENST00000523118.1	Uncharacterized protein	5	1	0	0	1	0	hsa-miR-638	-0.27	-0.27	N/A
CCDC92	ENST00000238156.3	coiled-coil domain containing 92	105	1	0	0	1	1	hsa-miR-638	-0.27	-0.37	N/A
PEA15	ENST00000360472.4	phosphoprotein enriched in astrocytes 15	5239	1	0	1	0	0	hsa-miR-638	-0.27	-0.27	N/A
APH1A	ENST00000360244.4	APH1A gamma secretase subunit	475	1	0	0	1	0	hsa-miR-638	-0.27	-0.27	N/A
POLR2C	ENST00000219252.5	polymerase (RNA) II (DNA directed) polypeptide C, 33kDa	223	1	0	0	1	0	hsa-miR-638	-0.27	-0.28	N/A
DUX4L5	ENST00000557283.2	double homeobox 4 like 5	5	1	0	0	1	0	hsa-miR-638	-0.27	-0.27	N/A
HPCAL1	ENST00000381765.3	hippocalcin-like 1	233	1	0	0	1	0	hsa-miR-638	-0.27	-0.27	N/A
EMILIN3	ENST00000332312.3	elastin microfibril interfacer 3	12	1	0	0	1	0	hsa-miR-638	-0.27	-0.27	N/A
RNGTT	ENST00000369485.4	RNA guanylyltransferase and 5'-phosphatase	1384	1	0	0	1	1	hsa-miR-638	-0.27	-0.29	N/A
PHKG1	ENST00000452681.2	phosphorylase kinase, gamma 1 (muscle)	5	2	0	1	1	0	hsa-miR-638	-0.27	-0.52	N/A
LILRA2	ENST00000251377.3	leukocyte immunoglobulin-like receptor, subfamily A (with TM domain), member 2	5	1	0	0	1	2	hsa-miR-638	-0.27	-0.36	N/A
OSGIN1	ENST00000343939.2	oxidative stress induced growth inhibitor 1	7	1	0	0	1	0	hsa-miR-638	-0.27	-0.27	N/A
ILDR1	ENST00000273691.3	immunoglobulin-like domain containing receptor 1	5	1	0	0	1	2	hsa-miR-638	-0.27	-0.27	N/A
LONP1	ENST00000360614.3	lon peptidase 1, mitochondrial	15	1	0	0	1	0	hsa-miR-638	-0.27	-0.27	N/A
NDUFA12	ENST00000547986.1	NADH dehydrogenase (ubiquinone) 1 alpha subcomplex, 12	299	1	0	0	1	0	hsa-miR-638	-0.27	-0.27	N/A
GEMIN7	ENST00000270257.4	gem (nuclear organelle) associated protein 7	329	1	0	0	1	0	hsa-miR-638	-0.27	-0.3	N/A
MOGAT2	ENST00000526712.1	monoacylglycerol O-acyltransferase 2	5	1	0	0	1	2	hsa-miR-638	-0.27	-0.27	N/A
IGLL1	ENST00000249053.3	immunoglobulin lambda-like polypeptide 1	5	1	0	0	1	0	hsa-miR-638	-0.27	-0.27	N/A
BAHD1	ENST00000416165.1	bromo adjacent homology domain containing 1	76	2	0	0	2	0	hsa-miR-638	-0.27	-0.27	N/A
MFSD12	ENST00000398558.4	major facilitator superfamily domain containing 12	6	1	0	0	1	0	hsa-miR-638	-0.27	-0.27	N/A
USP47	ENST00000339865.5	ubiquitin specific peptidase 47	665	1	1	0	0	0	hsa-miR-638	-0.27	-0.32	N/A
ZDHHC9	ENST00000357166.6	zinc finger, DHHC-type containing 9	1203	2	0	0	2	1	hsa-miR-638	-0.27	-0.37	N/A
PRR24	ENST00000552360.2	proline rich 24	282	1	0	0	1	0	hsa-miR-638	-0.27	-0.27	N/A
ULBP3	ENST00000367339.2	UL16 binding protein 3	64	1	0	0	1	0	hsa-miR-638	-0.27	-0.27	N/A
UBA7	ENST00000333486.3	ubiquitin-like modifier activating enzyme 7	5	1	0	0	1	0	hsa-miR-638	-0.27	-0.27	N/A
RGMA	ENST00000557420.1	RGM domain family, member A	145	1	0	1	0	0	hsa-miR-638	-0.27	-0.28	N/A
MEFV	ENST00000541159.1	Mediterranean fever	5	1	0	0	1	0	hsa-miR-638	-0.27	-0.27	N/A
TSTD2	ENST00000341170.4	thiosulfate sulfurtransferase (rhodanese)-like domain containing 2	219	2	0	0	2	0	hsa-miR-638	-0.27	-0.27	N/A
ATN1	ENST00000356654.4	atrophin 1	187	1	0	1	0	0	hsa-miR-638	-0.27	-0.27	N/A
FAM19A2	ENST00000416284.3	family with sequence similarity 19 (chemokine (C-C motif)-like), member A2	26	1	0	0	1	0	hsa-miR-638	-0.27	-0.27	N/A
IDH3G	ENST00000370093.1	isocitrate dehydrogenase 3 (NAD+) gamma	391	1	0	0	1	0	hsa-miR-638	-0.27	-0.27	N/A
SUMO1	ENST00000392246.2	small ubiquitin-like modifier 1	180	1	0	0	1	0	hsa-miR-638	-0.27	-0.27	N/A
CD300LB	ENST00000392621.1	CD300 molecule-like family member b	5	1	0	0	1	1	hsa-miR-638	-0.27	-0.27	N/A
PATE4	ENST00000457514.2	prostate and testis expressed 4	5	1	0	0	1	0	hsa-miR-638	-0.27	-0.27	N/A
CASKIN2	ENST00000321617.3	CASK interacting protein 2	92	1	0	0	1	0	hsa-miR-638	-0.26	-0.26	N/A
NEDD8	ENST00000250495.5	neural precursor cell expressed, developmentally down-regulated 8	30	1	0	0	1	0	hsa-miR-638	-0.26	-0.26	N/A
MANBAL	ENST00000397150.1	mannosidase, beta A, lysosomal-like	2819	1	0	0	1	0	hsa-miR-638	-0.26	-0.26	N/A
ARHGEF18	ENST00000319670.9	Rho/Rac guanine nucleotide exchange factor (GEF) 18	2596	1	0	0	1	1	hsa-miR-638	-0.26	-0.26	N/A
COL9A2	ENST00000372748.3	collagen, type IX, alpha 2	189	2	0	0	2	1	hsa-miR-638	-0.26	-0.41	N/A
C4orf36	ENST00000473559.1	chromosome 4 open reading frame 36	5	1	0	0	1	1	hsa-miR-638	-0.26	-0.26	N/A
CUEDC2	ENST00000369937.4	CUE domain containing 2	2239	1	0	0	1	0	hsa-miR-638	-0.26	-0.26	N/A
F10	ENST00000375551.3	coagulation factor X	208	1	0	0	1	0	hsa-miR-638	-0.26	-0.26	N/A
RP11-366L20.2	ENST00000356215.2	Uncharacterized protein	5	1	0	1	0	0	hsa-miR-638	-0.26	-0.26	N/A
ZNF787	ENST00000270459.3	zinc finger protein 787	191	1	0	0	1	0	hsa-miR-638	-0.26	-0.26	N/A
AC007390.5	ENST00000402297.1	HCG1988162; Uncharacterized protein	223	1	0	0	1	1	hsa-miR-638	-0.26	-0.27	N/A
AL953854.2	ENST00000438517.1		5	1	0	0	1	1	hsa-miR-638	-0.26	-0.26	N/A
DACT3	ENST00000300875.4	dishevelled-binding antagonist of beta-catenin 3	59	1	0	1	0	0	hsa-miR-638	-0.26	-0.26	N/A
CTB-58E17.5	ENST00000539023.1	Uncharacterized protein; cDNA FLJ52623	12	1	0	0	1	0	hsa-miR-638	-0.26	-0.26	N/A
HLA-DMA	ENST00000395305.3	major histocompatibility complex, class II, DM alpha	21	1	0	0	1	0	hsa-miR-638	-0.26	-0.26	N/A
SLC36A2	ENST00000335244.4	solute carrier family 36 (proton/amino acid symporter), member 2	5	1	0	0	1	0	hsa-miR-638	-0.26	-0.26	N/A
LCE5A	ENST00000334269.2	late cornified envelope 5A	5	1	0	0	1	0	hsa-miR-638	-0.26	-0.26	N/A
TBK1	ENST00000331710.5	TANK-binding kinase 1	54	1	0	0	1	0	hsa-miR-638	-0.26	-0.26	N/A
GRIA1	ENST00000285900.5	glutamate receptor, ionotropic, AMPA 1	5	2	0	0	2	0	hsa-miR-638	-0.26	-0.26	N/A
IL23R	ENST00000371002.1	interleukin 23 receptor	5	1	0	0	1	0	hsa-miR-638	-0.26	-0.26	N/A
LUZPP1	ENST00000599511.1	HCG1777807; Leucine zipper protein 3; Uncharacterized protein	5	1	0	0	1	1	hsa-miR-638	-0.26	-0.26	N/A
UBAC2	ENST00000376440.2	UBA domain containing 2	902	1	0	1	0	0	hsa-miR-638	-0.26	-0.27	N/A
SPSB1	ENST00000328089.6	splA/ryanodine receptor domain and SOCS box containing 1	572	1	0	0	1	0	hsa-miR-638	-0.26	-0.27	N/A
PRKD2	ENST00000601806.1	protein kinase D2	287	1	0	0	1	1	hsa-miR-638	-0.26	-0.3	N/A
TSPAN1	ENST00000372003.1	tetraspanin 1	16	1	0	0	1	0	hsa-miR-638	-0.26	-0.26	N/A
CCL4L2	ENST00000482104.1	chemokine (C-C motif) ligand 4-like 2	5	1	0	0	1	0	hsa-miR-638	-0.26	-0.26	N/A
MDM1	ENST00000540418.1	Mdm1 nuclear protein homolog (mouse)	146	1	0	0	1	0	hsa-miR-638	-0.26	-0.26	N/A
MAP7D2	ENST00000379651.3	MAP7 domain containing 2	490	1	0	0	1	0	hsa-miR-638	-0.26	-0.26	N/A
RP11-1102P16.1	ENST00000523987.1	Uncharacterized protein	5	1	0	0	1	0	hsa-miR-638	-0.26	-0.26	N/A
RTN4RL2	ENST00000335099.3	reticulon 4 receptor-like 2	13	1	0	1	0	0	hsa-miR-638	-0.26	-0.26	N/A
SNAP23	ENST00000249647.3	synaptosomal-associated protein, 23kDa	99	1	0	0	1	0	hsa-miR-638	-0.26	-0.26	N/A
USP29	ENST00000254181.4	ubiquitin specific peptidase 29	5	1	0	0	1	0	hsa-miR-638	-0.26	-0.26	N/A
TCEANC	ENST00000380600.1	transcription elongation factor A (SII) N-terminal and central domain containing	21	1	0	0	1	1	hsa-miR-638	-0.26	-0.26	N/A
C1orf233	ENST00000422725.1	chromosome 1 open reading frame 233	210	1	0	0	1	1	hsa-miR-638	-0.26	-0.26	N/A
C4orf19	ENST00000381980.4	chromosome 4 open reading frame 19	51	1	0	0	1	0	hsa-miR-638	-0.26	-0.26	N/A
PLCXD2	ENST00000477665.1	phosphatidylinositol-specific phospholipase C, X domain containing 2	5	1	0	0	1	0	hsa-miR-638	-0.26	-0.26	N/A
ERCC8	ENST00000426742.2	excision repair cross-complementing rodent repair deficiency, complementation group 8	219	1	0	0	1	0	hsa-miR-638	-0.25	-0.27	N/A
MMP1	ENST00000315274.6	matrix metallopeptidase 1 (interstitial collagenase)	2705	1	0	0	1	0	hsa-miR-638	-0.25	-0.25	N/A
TFAP2E	ENST00000373235.3	transcription factor AP-2 epsilon (activating enhancer binding protein 2 epsilon)	7	1	0	0	1	0	hsa-miR-638	-0.25	-0.25	N/A
DOK1	ENST00000340004.6	docking protein 1, 62kDa (downstream of tyrosine kinase 1)	331	1	0	0	1	0	hsa-miR-638	-0.25	-0.25	N/A
SURF6	ENST00000372022.4	surfeit 6	175	1	0	0	1	0	hsa-miR-638	-0.25	-0.25	N/A
GTF3C2	ENST00000359541.2	general transcription factor IIIC, polypeptide 2, beta 110kDa	981	1	0	0	1	0	hsa-miR-638	-0.25	-0.25	N/A
CLLU1	ENST00000378485.1	chronic lymphocytic leukemia up-regulated 1	5	1	0	0	1	0	hsa-miR-638	-0.25	-0.25	N/A
LAMTOR4	ENST00000441173.1	late endosomal/lysosomal adaptor, MAPK and MTOR activator 4	6156	1	0	0	1	0	hsa-miR-638	-0.25	-0.25	N/A
TNFRSF11B	ENST00000297350.4	tumor necrosis factor receptor superfamily, member 11b	1786	1	0	0	1	0	hsa-miR-638	-0.25	-0.25	N/A
CCDC30	ENST00000342022.4	coiled-coil domain containing 30	6	2	0	0	2	0	hsa-miR-638	-0.25	-0.29	N/A
GSTA4	ENST00000541324.1	glutathione S-transferase alpha 4	1890	1	0	0	1	0	hsa-miR-638	-0.25	-0.25	N/A
EPS8L3	ENST00000361852.4	EPS8-like 3	22	1	0	0	1	0	hsa-miR-638	-0.25	-0.25	N/A
DEDD2	ENST00000336034.4	death effector domain containing 2	32	1	0	0	1	0	hsa-miR-638	-0.25	-0.25	N/A
P2RX5	ENST00000551178.1	purinergic receptor P2X, ligand-gated ion channel, 5	260	1	0	0	1	0	hsa-miR-638	-0.25	-0.25	N/A
WNK4	ENST00000246914.5	WNK lysine deficient protein kinase 4	25	1	0	0	1	0	hsa-miR-638	-0.25	-0.25	N/A
SAMD9L	ENST00000318238.4	sterile alpha motif domain containing 9-like	5	1	0	0	1	0	hsa-miR-638	-0.25	-0.25	N/A
ZNF266	ENST00000361451.2	zinc finger protein 266	16	1	0	1	0	0	hsa-miR-638	-0.25	-0.25	N/A
MRPS2	ENST00000371785.1	mitochondrial ribosomal protein S2	872	1	0	0	1	0	hsa-miR-638	-0.25	-0.25	N/A
IL20RA	ENST00000316649.5	interleukin 20 receptor, alpha	40	1	0	0	1	0	hsa-miR-638	-0.25	-0.25	N/A
XKR8	ENST00000373884.5	XK, Kell blood group complex subunit-related family, member 8	7	1	0	0	1	0	hsa-miR-638	-0.25	-0.25	N/A
UCP2	ENST00000536983.1	uncoupling protein 2 (mitochondrial, proton carrier)	32	1	0	0	1	0	hsa-miR-638	-0.25	-0.25	N/A
PCBD2	ENST00000512783.1	pterin-4 alpha-carbinolamine dehydratase/dimerization cofactor of hepatocyte nuclear factor 1 alpha (TCF1) 2	95	1	0	0	1	3	hsa-miR-638	-0.25	-0.25	N/A
KDM1A	ENST00000356634.3	lysine (K)-specific demethylase 1A	4985	1	0	0	1	0	hsa-miR-638	-0.25	-0.25	N/A
DLGAP3	ENST00000373347.1	discs, large (Drosophila) homolog-associated protein 3	8	2	0	0	2	1	hsa-miR-638	-0.25	-0.32	N/A
KCNJ6	ENST00000609713.1	potassium inwardly-rectifying channel, subfamily J, member 6	5	4	0	0	4	0	hsa-miR-638	-0.25	-0.25	N/A
IKBKE	ENST00000367120.3	inhibitor of kappa light polypeptide gene enhancer in B-cells, kinase epsilon	334	1	0	0	1	0	hsa-miR-638	-0.25	-0.25	N/A
SELT	ENST00000471696.1	Selenoprotein T	538	1	0	0	1	0	hsa-miR-638	-0.25	-0.25	N/A
CYSLTR2	ENST00000282018.3	cysteinyl leukotriene receptor 2	5	1	0	0	1	0	hsa-miR-638	-0.25	-0.25	N/A
C11orf86	ENST00000308963.4	chromosome 11 open reading frame 86	5	1	0	0	1	0	hsa-miR-638	-0.24	-0.24	N/A
CPN2	ENST00000323830.3	carboxypeptidase N, polypeptide 2	8	1	0	0	1	0	hsa-miR-638	-0.24	-0.24	N/A
CCDC149	ENST00000428116.2	coiled-coil domain containing 149	187	2	0	0	2	0	hsa-miR-638	-0.24	-0.44	N/A
NAALAD2	ENST00000534061.1	N-acetylated alpha-linked acidic dipeptidase 2	5	2	0	0	2	1	hsa-miR-638	-0.24	-0.43	N/A
TNFSF14	ENST00000245912.3	tumor necrosis factor (ligand) superfamily, member 14	5	1	0	0	1	0	hsa-miR-638	-0.24	-0.24	N/A
UBQLNL	ENST00000380184.1	ubiquilin-like	5	1	0	0	1	0	hsa-miR-638	-0.24	-0.24	N/A
RASL12	ENST00000220062.4	RAS-like, family 12	39	1	0	0	1	0	hsa-miR-638	-0.24	-0.24	N/A
SNCB	ENST00000310112.3	synuclein, beta	5	1	0	1	0	0	hsa-miR-638	-0.24	-0.24	N/A
BRPF3	ENST00000534400.1	bromodomain and PHD finger containing, 3	7032	1	0	0	1	0	hsa-miR-638	-0.24	-0.24	N/A
GTF3C5	ENST00000342018.8	general transcription factor IIIC, polypeptide 5, 63kDa	593	1	0	0	1	0	hsa-miR-638	-0.24	-0.24	N/A
KBTBD4	ENST00000526005.1	kelch repeat and BTB (POZ) domain containing 4	7	1	0	0	1	0	hsa-miR-638	-0.24	-0.24	N/A
TPBGL	ENST00000562197.2	trophoblast glycoprotein-like	8	1	0	0	1	0	hsa-miR-638	-0.24	-0.24	N/A
DDX52	ENST00000349699.2	DEAD (Asp-Glu-Ala-Asp) box polypeptide 52	865	1	0	0	1	0	hsa-miR-638	-0.24	-0.24	N/A
AL356356.1	ENST00000538795.1	Protein LOC100996516	5	1	0	0	1	0	hsa-miR-638	-0.24	-0.24	N/A
AQP7	ENST00000537089.1	aquaporin 7	10	1	0	0	1	0	hsa-miR-638	-0.24	-0.24	N/A
PTRF	ENST00000357037.5	polymerase I and transcript release factor	987	1	0	1	0	2	hsa-miR-638	-0.24	-0.25	N/A
FOXE3	ENST00000335071.2	forkhead box E3	11	1	0	0	1	0	hsa-miR-638	-0.24	-0.24	N/A
EHMT2	ENST00000395728.3	euchromatic histone-lysine N-methyltransferase 2	1379	1	0	0	1	0	hsa-miR-638	-0.24	-0.24	N/A
MC2R	ENST00000327606.3	melanocortin 2 receptor (adrenocorticotropic hormone)	5	1	0	0	1	0	hsa-miR-638	-0.24	-0.24	N/A
ENHO	ENST00000399775.2	energy homeostasis associated	124	1	0	0	1	0	hsa-miR-638	-0.24	-0.24	N/A
SFTPC	ENST00000521315.1	surfactant protein C	5	1	0	0	1	0	hsa-miR-638	-0.24	-0.24	N/A
IL11	ENST00000264563.2	interleukin 11	483	1	0	0	1	1	hsa-miR-638	-0.24	-0.35	N/A
EDN3	ENST00000311585.7	endothelin 3	5	1	0	0	1	0	hsa-miR-638	-0.24	-0.24	N/A
HLA-DPA1	ENST00000419277.1	major histocompatibility complex, class II, DP alpha 1	5	1	0	0	1	0	hsa-miR-638	-0.24	-0.24	N/A
EVA1C	ENST00000401402.3	eva-1 homolog C (C. elegans)	177	1	0	0	1	0	hsa-miR-638	-0.24	-0.24	N/A
FCGR2B	ENST00000358671.5	Fc fragment of IgG, low affinity IIb, receptor (CD32)	5	1	0	0	1	0	hsa-miR-638	-0.24	-0.24	N/A
IQCH	ENST00000358767.3	IQ motif containing H	46	1	0	0	1	0	hsa-miR-638	-0.24	-0.24	N/A
AMPD2	ENST00000342115.4	adenosine monophosphate deaminase 2	216	1	0	0	1	0	hsa-miR-638	-0.24	-0.24	N/A
MYF6	ENST00000228641.3	myogenic factor 6 (herculin)	5	1	0	0	1	0	hsa-miR-638	-0.24	-0.24	N/A
ZFP91	ENST00000316059.6	ZFP91 zinc finger protein	688	1	0	0	1	2	hsa-miR-638	-0.24	-0.24	N/A
SCRT2	ENST00000246104.6	scratch homolog 2, zinc finger protein (Drosophila)	5	1	0	0	1	1	hsa-miR-638	-0.24	-0.24	N/A
NEK5	ENST00000355568.4	NIMA-related kinase 5	5	1	0	0	1	0	hsa-miR-638	-0.24	-0.24	N/A
ZNRF1	ENST00000335325.4	zinc and ring finger 1, E3 ubiquitin protein ligase	519	1	0	0	1	0	hsa-miR-638	-0.24	-0.24	N/A
POM121L7	ENST00000329949.3	POM121 transmembrane nucleoporin-like 7	5	1	0	0	1	0	hsa-miR-638	-0.23	-0.23	N/A
SRR	ENST00000344595.5	serine racemase	95	1	0	0	1	0	hsa-miR-638	-0.23	-0.24	N/A
ASB2	ENST00000555019.1	ankyrin repeat and SOCS box containing 2	5	1	0	0	1	0	hsa-miR-638	-0.23	-0.23	N/A
ULBP1	ENST00000229708.3	UL16 binding protein 1	16	1	0	0	1	0	hsa-miR-638	-0.23	-0.23	N/A
ANKRD23	ENST00000318357.4	ankyrin repeat domain 23	9	1	0	0	1	0	hsa-miR-638	-0.23	-0.23	N/A
CEACAM7	ENST00000006724.3	carcinoembryonic antigen-related cell adhesion molecule 7	5	1	0	0	1	0	hsa-miR-638	-0.23	-0.23	N/A
CD6	ENST00000313421.7	CD6 molecule	5	1	0	0	1	0	hsa-miR-638	-0.23	-0.23	N/A
FAM83F	ENST00000333407.6	family with sequence similarity 83, member F	5	4	0	0	4	1	hsa-miR-638	-0.23	-0.23	N/A
ZNF185	ENST00000535861.1	zinc finger protein 185 (LIM domain)	106	1	0	0	1	2	hsa-miR-638	-0.23	-0.23	N/A
JAKMIP2	ENST00000507386.1	janus kinase and microtubule interacting protein 2	26	2	0	0	2	1	hsa-miR-638	-0.23	-0.43	N/A
FOXD2	ENST00000334793.5	forkhead box D2	118	1	0	0	1	1	hsa-miR-638	-0.23	-0.23	N/A
S100A7A	ENST00000368729.4	S100 calcium binding protein A7A	5	1	0	0	1	0	hsa-miR-638	-0.23	-0.23	N/A
ETNK2	ENST00000367201.3	ethanolamine kinase 2	7	1	0	0	1	1	hsa-miR-638	-0.23	-0.23	N/A
EIF4A1	ENST00000582746.1	eukaryotic translation initiation factor 4A1	44	1	0	0	1	0	hsa-miR-638	-0.23	-0.28	N/A
FUT10	ENST00000327671.5	fucosyltransferase 10 (alpha (1,3) fucosyltransferase)	124	2	0	0	2	0	hsa-miR-638	-0.23	-0.37	N/A
CRISPLD2	ENST00000262424.5	cysteine-rich secretory protein LCCL domain containing 2	397	2	1	1	0	0	hsa-miR-638	-0.23	-0.27	N/A
CD28	ENST00000324106.8	CD28 molecule	5	1	0	0	1	1	hsa-miR-638	-0.23	-0.23	N/A
INTS3	ENST00000318967.2	integrator complex subunit 3	88	1	0	0	1	0	hsa-miR-638	-0.23	-0.23	N/A
LAMC2	ENST00000264144.4	laminin, gamma 2	21	1	0	0	1	0	hsa-miR-638	-0.23	-0.23	N/A
PHF15	ENST00000402835.1	PHD finger protein 15	387	2	0	1	1	1	hsa-miR-638	-0.23	-0.34	N/A
SMAP2	ENST00000539317.1	small ArfGAP2	1062	1	0	0	1	0	hsa-miR-638	-0.23	-0.24	N/A
OGN	ENST00000262551.4	osteoglycin	5	1	0	0	1	0	hsa-miR-638	-0.23	-0.23	N/A
REPIN1	ENST00000479668.1	replication initiator 1	2836	1	0	0	1	0	hsa-miR-638	-0.23	-0.23	N/A
PIP5K1A	ENST00000368890.4	phosphatidylinositol-4-phosphate 5-kinase, type I, alpha	3762	1	0	0	1	0	hsa-miR-638	-0.23	-0.23	N/A
DBH	ENST00000393056.2	dopamine beta-hydroxylase (dopamine beta-monooxygenase)	5	1	0	1	0	0	hsa-miR-638	-0.23	-0.23	N/A
PYCR1	ENST00000329875.8	pyrroline-5-carboxylate reductase 1	157	2	0	0	2	0	hsa-miR-638	-0.23	-0.24	N/A
XK	ENST00000378616.3	X-linked Kx blood group (McLeod syndrome)	39	1	0	0	1	1	hsa-miR-638	-0.23	-0.23	N/A
C2ORF15	ENST00000302513.2	Uncharacterized protein C2orf15	166	1	0	0	1	1	hsa-miR-638	-0.23	-0.24	N/A
SPTLC1	ENST00000262554.2	serine palmitoyltransferase, long chain base subunit 1	2578	1	0	0	1	0	hsa-miR-638	-0.23	-0.23	N/A
KRT71	ENST00000267119.5	keratin 71	5	1	0	0	1	0	hsa-miR-638	-0.23	-0.23	N/A
C2orf15	ENST00000512183.2	chromosome 2 open reading frame 15	246	1	0	0	1	0	hsa-miR-638	-0.23	-0.29	N/A
MRPL30	ENST00000338148.3	mitochondrial ribosomal protein L30	246	1	0	0	1	0	hsa-miR-638	-0.23	-0.29	N/A
IFT46	ENST00000530872.1	intraflagellar transport 46 homolog (Chlamydomonas)	214	1	0	0	1	0	hsa-miR-638	-0.23	-0.24	N/A
RAB22A	ENST00000244040.3	RAB22A, member RAS oncogene family	484	2	0	0	2	0	hsa-miR-638	-0.23	-0.36	N/A
CDCA8	ENST00000373055.1	cell division cycle associated 8	1689	1	0	0	1	0	hsa-miR-638	-0.23	-0.23	N/A
SRL	ENST00000399609.3	sarcalumenin	5	2	0	1	1	0	hsa-miR-638	-0.23	-0.23	N/A
MYCL	ENST00000397332.2	v-myc avian myelocytomatosis viral oncogene lung carcinoma derived homolog	10	1	0	0	1	1	hsa-miR-638	-0.23	-0.23	N/A
DCAF4	ENST00000394234.2	DDB1 and CUL4 associated factor 4	45	1	0	0	1	0	hsa-miR-638	-0.23	-0.23	N/A
TP53I11	ENST00000395648.3	tumor protein p53 inducible protein 11	90	1	0	0	1	0	hsa-miR-638	-0.23	-0.23	N/A
CNGA2	ENST00000329903.4	cyclic nucleotide gated channel alpha 2	5	1	0	0	1	0	hsa-miR-638	-0.23	-0.23	N/A
GUCD1	ENST00000447813.2	guanylyl cyclase domain containing 1	2990	1	0	0	1	1	hsa-miR-638	-0.23	-0.23	N/A
PHC1	ENST00000433083.2	polyhomeotic homolog 1 (Drosophila)	5	1	0	0	1	1	hsa-miR-638	-0.23	-0.23	N/A
ESRP2	ENST00000565858.1	epithelial splicing regulatory protein 2	320	1	0	0	1	0	hsa-miR-638	-0.23	-0.23	N/A
SEC14L1	ENST00000413679.2	SEC14-like 1 (S. cerevisiae)	1399	1	0	0	1	0	hsa-miR-638	-0.23	-0.23	N/A
FSTL3	ENST00000166139.4	follistatin-like 3 (secreted glycoprotein)	207	1	0	0	1	0	hsa-miR-638	-0.23	-0.23	N/A
SYNCRIP	ENST00000355238.6	synaptotagmin binding, cytoplasmic RNA interacting protein	4864	2	0	0	2	1	hsa-miR-638	-0.23	-0.37	N/A
RBPMS	ENST00000320203.4	RNA binding protein with multiple splicing	472	1	0	0	1	1	hsa-miR-638	-0.23	-0.24	N/A
KDM4C	ENST00000381309.3	lysine (K)-specific demethylase 4C	160	1	0	0	1	0	hsa-miR-638	-0.23	-0.23	N/A
CHAC1	ENST00000446533.3	ChaC, cation transport regulator homolog 1 (E. coli)	190	1	0	0	1	0	hsa-miR-638	-0.23	-0.23	N/A
MRRF	ENST00000344641.3	mitochondrial ribosome recycling factor	85	2	0	0	2	3	hsa-miR-638	-0.23	-0.43	N/A
CABLES2	ENST00000279101.5	Cdk5 and Abl enzyme substrate 2	450	1	0	0	1	0	hsa-miR-638	-0.22	-0.23	N/A
IGLL5	ENST00000532223.2	immunoglobulin lambda-like polypeptide 5	5	1	0	0	1	0	hsa-miR-638	-0.22	-0.22	N/A
GABRG2	ENST00000356592.3	gamma-aminobutyric acid (GABA) A receptor, gamma 2	24	1	0	0	1	0	hsa-miR-638	-0.22	-0.22	N/A
SLA2	ENST00000262866.4	Src-like-adaptor 2	5	1	0	0	1	0	hsa-miR-638	-0.22	-0.22	N/A
APLP2	ENST00000263574.5	amyloid beta (A4) precursor-like protein 2	5552	1	0	0	1	0	hsa-miR-638	-0.22	-0.22	N/A
MEIS2	ENST00000397624.3	Meis homeobox 2	63	1	0	0	1	1	hsa-miR-638	-0.22	-0.24	N/A
HOXB6	ENST00000484302.2	homeobox B6	12	1	0	0	1	1	hsa-miR-638	-0.22	-0.24	N/A
ACRV1	ENST00000533904.1	acrosomal vesicle protein 1	5	1	0	0	1	0	hsa-miR-638	-0.22	-0.22	N/A
FGF14	ENST00000376131.4	fibroblast growth factor 14	5	1	0	0	1	0	hsa-miR-638	-0.22	-0.22	N/A
PRRT2	ENST00000300797.6	proline-rich transmembrane protein 2	33	1	0	0	1	1	hsa-miR-638	-0.22	-0.22	N/A
C6orf164	ENST00000369570.4	chromosome 6 open reading frame 164	5	1	0	0	1	0	hsa-miR-638	-0.22	-0.22	N/A
XAF1	ENST00000361842.3	XIAP associated factor 1	5	1	0	0	1	0	hsa-miR-638	-0.22	-0.22	N/A
PDCD1LG2	ENST00000397745.2	programmed cell death 1 ligand 2	64	1	0	0	1	0	hsa-miR-638	-0.22	-0.25	N/A
KPNA6	ENST00000373625.3	karyopherin alpha 6 (importin alpha 7)	272	2	0	0	2	1	hsa-miR-638	-0.22	-0.28	N/A
SDC4	ENST00000372733.3	syndecan 4	1252	1	0	0	1	0	hsa-miR-638	-0.22	-0.25	N/A
SLC6A11	ENST00000254488.2	solute carrier family 6 (neurotransmitter transporter), member 11	83	1	0	0	1	1	hsa-miR-638	-0.22	-0.23	N/A
KBTBD6	ENST00000379485.1	kelch repeat and BTB (POZ) domain containing 6	51	1	0	0	1	0	hsa-miR-638	-0.22	-0.22	N/A
PAQR9	ENST00000340634.3	progestin and adipoQ receptor family member IX	233	1	0	0	1	0	hsa-miR-638	-0.22	-0.22	N/A
AC112693.2	ENST00000599897.1		5	1	0	0	1	0	hsa-miR-638	-0.22	-0.22	N/A
AMT	ENST00000458307.2	aminomethyltransferase	63	1	0	0	1	0	hsa-miR-638	-0.22	-0.22	N/A
PAG1	ENST00000220597.4	phosphoprotein associated with glycosphingolipid microdomains 1	53	1	0	0	1	1	hsa-miR-638	-0.22	-0.22	N/A
SFXN3	ENST00000393459.1	sideroflexin 3	154	1	0	0	1	0	hsa-miR-638	-0.22	-0.22	N/A
KIAA0247	ENST00000342745.4	KIAA0247	161	1	0	0	1	1	hsa-miR-638	-0.22	-0.22	N/A
FAM195B	ENST00000576679.1	family with sequence similarity 195, member B	164	1	0	0	1	0	hsa-miR-638	-0.22	-0.22	N/A
CDK18	ENST00000360066.2	cyclin-dependent kinase 18	262	1	0	0	1	0	hsa-miR-638	-0.22	-0.22	N/A
CYP4V2	ENST00000378802.4	cytochrome P450, family 4, subfamily V, polypeptide 2	121	1	0	0	1	0	hsa-miR-638	-0.22	-0.24	N/A
NOVA1	ENST00000465357.2	neuro-oncological ventral antigen 1	5	1	0	0	1	1	hsa-miR-638	-0.22	-0.22	N/A
HIF3A	ENST00000377670.4	hypoxia inducible factor 3, alpha subunit	5	1	0	1	0	0	hsa-miR-638	-0.22	-0.22	N/A
ABHD12	ENST00000339157.5	abhydrolase domain containing 12	3572	1	0	0	1	0	hsa-miR-638	-0.22	-0.22	N/A
ANKRD28	ENST00000399451.2	ankyrin repeat domain 28	798	1	0	0	1	0	hsa-miR-638	-0.22	-0.22	N/A
EBPL	ENST00000378284.2	emopamil binding protein-like	155	1	0	0	1	0	hsa-miR-638	-0.22	-0.22	N/A
CYP19A1	ENST00000396402.1	cytochrome P450, family 19, subfamily A, polypeptide 1	5	1	0	0	1	0	hsa-miR-638	-0.22	-0.22	N/A
PSMG4	ENST00000473000.2	proteasome (prosome, macropain) assembly chaperone 4	1452	1	0	0	1	0	hsa-miR-638	-0.22	-0.22	N/A
FAM20A	ENST00000592554.1	family with sequence similarity 20, member A	198	1	0	0	1	0	hsa-miR-638	-0.22	-0.22	N/A
C14orf80	ENST00000329886.7	chromosome 14 open reading frame 80	314	1	0	0	1	0	hsa-miR-638	-0.22	-0.22	N/A
ATP6AP1L	ENST00000380167.4	ATPase, H+ transporting, lysosomal accessory protein 1-like	56	1	0	0	1	0	hsa-miR-638	-0.22	-0.22	N/A
HRK	ENST00000257572.5	harakiri, BCL2 interacting protein (contains only BH3 domain)	19	1	0	0	1	1	hsa-miR-638	-0.22	-0.22	N/A
SP8	ENST00000418710.2	Sp8 transcription factor	95	1	0	0	1	0	hsa-miR-638	-0.22	-0.23	N/A
SMC1A	ENST00000322213.4	structural maintenance of chromosomes 1A	1626	1	0	0	1	2	hsa-miR-638	-0.22	-0.22	N/A
LMO4	ENST00000370544.5	LIM domain only 4	294	1	0	0	1	0	hsa-miR-638	-0.22	-0.22	N/A
CD200	ENST00000315711.8	CD200 molecule	5	1	0	0	1	0	hsa-miR-638	-0.22	-0.22	N/A
KIAA0754	ENST00000530275.1	KIAA0754	5	1	0	0	1	0	hsa-miR-638	-0.22	-0.22	N/A
BOLL	ENST00000392296.4	bol, boule-like (Drosophila)	15	1	0	0	1	0	hsa-miR-638	-0.22	-0.22	N/A
CYP2U1	ENST00000332884.6	cytochrome P450, family 2, subfamily U, polypeptide 1	202	1	0	0	1	0	hsa-miR-638	-0.22	-0.23	N/A
ZNF280D	ENST00000558320.1	zinc finger protein 280D	173	1	0	0	1	0	hsa-miR-638	-0.21	-0.21	N/A
CCNB1IP1	ENST00000398160.2	cyclin B1 interacting protein 1, E3 ubiquitin protein ligase	20	2	0	0	2	0	hsa-miR-638	-0.21	-0.3	N/A
CHST9	ENST00000580774.1	carbohydrate (N-acetylgalactosamine 4-0) sulfotransferase 9	20	1	0	0	1	0	hsa-miR-638	-0.21	-0.21	N/A
FPR3	ENST00000339223.4	formyl peptide receptor 3	5	1	0	0	1	0	hsa-miR-638	-0.21	-0.21	N/A
PRKAB2	ENST00000254101.3	protein kinase, AMP-activated, beta 2 non-catalytic subunit	363	1	0	0	1	0	hsa-miR-638	-0.21	-0.21	N/A
GPR180	ENST00000376958.4	G protein-coupled receptor 180	161	1	0	0	1	0	hsa-miR-638	-0.21	-0.22	N/A
PIM1	ENST00000373509.5	pim-1 oncogene	2041	1	0	0	1	0	hsa-miR-638	-0.21	-0.21	N/A
HNRNPA0	ENST00000314940.4	heterogeneous nuclear ribonucleoprotein A0	22668	1	0	0	1	0	hsa-miR-638	-0.21	-0.21	N/A
PARP15	ENST00000483793.1	poly (ADP-ribose) polymerase family, member 15	5	1	0	0	1	1	hsa-miR-638	-0.21	-0.21	N/A
REEP6	ENST00000233596.3	receptor accessory protein 6	822	1	0	0	1	0	hsa-miR-638	-0.21	-0.21	N/A
THNSL2	ENST00000343544.4	threonine synthase-like 2 (S. cerevisiae)	219	1	0	0	1	0	hsa-miR-638	-0.21	-0.21	N/A
KLHL22	ENST00000328879.4	kelch-like family member 22	76	1	0	0	1	0	hsa-miR-638	-0.21	-0.21	N/A
MOCS1	ENST00000373186.4	molybdenum cofactor synthesis 1	179	1	0	0	1	2	hsa-miR-638	-0.21	-0.24	N/A
BAALC	ENST00000438105.2	brain and acute leukemia, cytoplasmic	137	1	0	0	1	0	hsa-miR-638	-0.21	-0.21	N/A
SYNDIG1	ENST00000376862.3	synapse differentiation inducing 1	5	1	0	0	1	0	hsa-miR-638	-0.21	-0.21	N/A
DDIT4L	ENST00000273990.2	DNA-damage-inducible transcript 4-like	87	1	0	0	1	0	hsa-miR-638	-0.21	-0.21	N/A
IFITM10	ENST00000340134.4	interferon induced transmembrane protein 10	7	1	0	0	1	0	hsa-miR-638	-0.21	-0.21	N/A
STARD8	ENST00000252336.6	StAR-related lipid transfer (START) domain containing 8	29	1	0	0	1	1	hsa-miR-638	-0.21	-0.21	N/A
RNF4	ENST00000511859.1	ring finger protein 4	33	1	0	0	1	0	hsa-miR-638	-0.21	-0.25	N/A
HSP90B1	ENST00000299767.5	heat shock protein 90kDa beta (Grp94), member 1	42	1	0	0	1	0	hsa-miR-638	-0.21	-0.25	N/A
SYT11	ENST00000368324.4	synaptotagmin XI	750	1	0	0	1	1	hsa-miR-638	-0.21	-0.21	N/A
FAM222A	ENST00000538780.1	family with sequence similarity 222, member A	23	1	0	0	1	0	hsa-miR-638	-0.21	-0.23	N/A
AP001652.1	ENST00000454512.1	Uncharacterized protein; cDNA FLJ60524	5	1	0	0	1	0	hsa-miR-638	-0.21	-0.21	N/A
CCDC151	ENST00000356392.4	coiled-coil domain containing 151	5	1	0	1	0	0	hsa-miR-638	-0.21	-0.21	N/A
AC093802.1	ENST00000407524.1	Uncharacterized protein	5	1	0	0	1	0	hsa-miR-638	-0.21	-0.21	N/A
ASF1B	ENST00000263382.3	anti-silencing function 1B histone chaperone	300	1	0	0	1	0	hsa-miR-638	-0.21	-0.21	N/A
KRI1	ENST00000312962.6	KRI1 homolog (S. cerevisiae)	25	1	0	0	1	0	hsa-miR-638	-0.21	-0.27	N/A
PRMT6	ENST00000370078.1	protein arginine methyltransferase 6	270	2	0	0	2	1	hsa-miR-638	-0.21	-0.24	N/A
SLC25A32	ENST00000297578.4	solute carrier family 25 (mitochondrial folate carrier), member 32	554	1	0	0	1	0	hsa-miR-638	-0.21	-0.23	N/A
ZNF432	ENST00000594154.1	zinc finger protein 432	151	1	0	0	1	0	hsa-miR-638	-0.21	-0.21	N/A
PAQR3	ENST00000512733.1	progestin and adipoQ receptor family member III	217	1	0	0	1	0	hsa-miR-638	-0.21	-0.21	N/A
AC008394.1	ENST00000445770.2	Uncharacterized protein	5	1	0	0	1	0	hsa-miR-638	-0.21	-0.21	N/A
AC016559.1	ENST00000594347.1	Uncharacterized protein	15	1	0	0	1	1	hsa-miR-638	-0.21	-0.21	N/A
KPTN	ENST00000338134.3	kaptin (actin binding protein)	312	1	0	0	1	0	hsa-miR-638	-0.21	-0.21	N/A
SRCIN1	ENST00000264659.7	SRC kinase signaling inhibitor 1	5	1	0	0	1	1	hsa-miR-638	-0.21	-0.21	N/A
TMEM80	ENST00000397512.3	transmembrane protein 80	184	1	0	0	1	0	hsa-miR-638	-0.21	-0.21	N/A
ZMPSTE24	ENST00000372759.3	zinc metallopeptidase STE24	513	1	0	0	1	0	hsa-miR-638	-0.21	-0.23	N/A
ZNF264	ENST00000263095.6	zinc finger protein 264	412	1	0	0	1	2	hsa-miR-638	-0.21	-0.23	N/A
STC2	ENST00000265087.4	stanniocalcin 2	1112	1	0	0	1	0	hsa-miR-638	-0.21	-0.25	N/A
FAM196B	ENST00000377365.3	family with sequence similarity 196, member B	174	1	0	0	1	0	hsa-miR-638	-0.21	-0.21	N/A
STAC	ENST00000273183.3	SH3 and cysteine rich domain	172	1	0	0	1	0	hsa-miR-638	-0.2	-0.2	N/A
DNAJC9	ENST00000372950.4	DnaJ (Hsp40) homolog, subfamily C, member 9	175	1	0	0	1	0	hsa-miR-638	-0.2	-0.23	N/A
BHLHA15	ENST00000609256.1	basic helix-loop-helix family, member a15	136	2	0	1	1	0	hsa-miR-638	-0.2	-0.21	N/A
KCTD17	ENST00000402077.3	potassium channel tetramerization domain containing 17	187	1	0	0	1	0	hsa-miR-638	-0.2	-0.2	N/A
UNC119	ENST00000301032.4	unc-119 homolog (C. elegans)	49	1	0	0	1	0	hsa-miR-638	-0.2	-0.2	N/A
SERINC4	ENST00000299969.6	serine incorporator 4	9	1	0	0	1	0	hsa-miR-638	-0.2	-0.2	N/A
PAK2	ENST00000327134.3	p21 protein (Cdc42/Rac)-activated kinase 2	145	1	0	0	1	0	hsa-miR-638	-0.2	-0.2	N/A
MICU3	ENST00000318063.5	mitochondrial calcium uptake family, member 3	9	1	0	0	1	0	hsa-miR-638	-0.2	-0.2	N/A
TUBB1	ENST00000217133.1	tubulin, beta 1 class VI	5	1	0	0	1	0	hsa-miR-638	-0.2	-0.2	N/A
TINAGL1	ENST00000457433.2	tubulointerstitial nephritis antigen-like 1	48	1	0	0	1	0	hsa-miR-638	-0.2	-0.2	N/A
PRKAR1A	ENST00000589228.1	protein kinase, cAMP-dependent, regulatory, type I, alpha	1257	1	0	0	1	1	hsa-miR-638	-0.2	-0.21	N/A
TRPV3	ENST00000301365.4	transient receptor potential cation channel, subfamily V, member 3	13	1	0	0	1	0	hsa-miR-638	-0.2	-0.2	N/A
EPHX3	ENST00000221730.3	epoxide hydrolase 3	5	1	0	0	1	0	hsa-miR-638	-0.2	-0.2	N/A
RBM38	ENST00000440234.2	RNA binding motif protein 38	18	1	0	0	1	0	hsa-miR-638	-0.2	-0.2	N/A
AP1B1	ENST00000357586.2	adaptor-related protein complex 1, beta 1 subunit	646	1	0	1	0	0	hsa-miR-638	-0.2	-0.2	N/A
CCL4L1	ENST00000586598.1	chemokine (C-C motif) ligand 4-like 1	5	1	0	0	1	0	hsa-miR-638	-0.2	-0.2	N/A
GPR173	ENST00000332582.4	G protein-coupled receptor 173	99	1	0	0	1	1	hsa-miR-638	-0.2	-0.27	N/A
CNP	ENST00000393892.3	2',3'-cyclic nucleotide 3' phosphodiesterase	399	2	0	0	2	0	hsa-miR-638	-0.2	-0.35	N/A
BRCA1	ENST00000468300.1	breast cancer 1, early onset	396	1	0	0	1	1	hsa-miR-638	-0.2	-0.2	N/A
GPR4	ENST00000323040.4	G protein-coupled receptor 4	5	1	0	0	1	0	hsa-miR-638	-0.2	-0.2	N/A
ZNF786	ENST00000316286.9	zinc finger protein 786	203	1	0	0	1	0	hsa-miR-638	-0.2	-0.2	N/A
SHPRH	ENST00000367505.2	SNF2 histone linker PHD RING helicase, E3 ubiquitin protein ligase	757	1	0	0	1	0	hsa-miR-638	-0.2	-0.2	N/A
DNAJB5	ENST00000545841.1	DnaJ (Hsp40) homolog, subfamily B, member 5	379	1	0	0	1	0	hsa-miR-638	-0.2	-0.2	N/A
SAP30BP	ENST00000584667.1	SAP30 binding protein	867	1	0	0	1	0	hsa-miR-638	-0.2	-0.27	N/A
RP11-113D6.10	ENST00000527059.1	Putative mitochondrial carrier protein LOC494141	5	1	0	0	1	1	hsa-miR-638	-0.2	-0.2	N/A
LDLR	ENST00000558518.1	low density lipoprotein receptor	1462	3	0	0	3	0	hsa-miR-638	-0.2	-0.26	N/A
SNRNP27	ENST00000244227.3	small nuclear ribonucleoprotein 27kDa (U4/U6.U5)	289	1	0	0	1	0	hsa-miR-638	-0.2	-0.22	N/A
GLYCTK	ENST00000354773.4	glycerate kinase	3833	1	0	0	1	0	hsa-miR-638	-0.2	-0.2	N/A
CAPS	ENST00000222125.5	calcyphosine	12	1	0	1	0	0	hsa-miR-638	-0.2	-0.2	N/A
MAB21L3	ENST00000369500.3	mab-21-like 3 (C. elegans)	5	1	0	0	1	0	hsa-miR-638	-0.2	-0.2	N/A
RFNG	ENST00000310496.4	RFNG O-fucosylpeptide 3-beta-N-acetylglucosaminyltransferase	242	1	0	0	1	0	hsa-miR-638	-0.2	-0.2	N/A
MPP2	ENST00000377184.3	membrane protein, palmitoylated 2 (MAGUK p55 subfamily member 2)	78	1	0	0	1	0	hsa-miR-638	-0.2	-0.2	N/A
WDR36	ENST00000506538.2	WD repeat domain 36	282	1	0	0	1	0	hsa-miR-638	-0.2	-0.22	N/A
NSFL1C	ENST00000353088.2	NSFL1 (p97) cofactor (p47)	397	1	0	0	1	0	hsa-miR-638	-0.2	-0.21	N/A
GNPNAT1	ENST00000216410.3	glucosamine-phosphate N-acetyltransferase 1	429	1	0	0	1	0	hsa-miR-638	-0.2	-0.24	N/A
RP11-192H23.4	ENST00000534850.1	Uncharacterized protein	22	1	0	0	1	0	hsa-miR-638	-0.2	-0.2	N/A
GPR157	ENST00000377411.4	G protein-coupled receptor 157	48	1	0	1	0	1	hsa-miR-638	-0.2	-0.21	N/A
SCD5	ENST00000319540.4	stearoyl-CoA desaturase 5	1181	1	0	0	1	0	hsa-miR-638	-0.2	-0.2	N/A
UPP2	ENST00000605860.1	uridine phosphorylase 2	5	1	0	0	1	0	hsa-miR-638	-0.2	-0.2	N/A
C8orf82	ENST00000313465.5	chromosome 8 open reading frame 82	94	1	0	0	1	0	hsa-miR-638	-0.2	-0.2	N/A
FAM171B	ENST00000304698.5	family with sequence similarity 171, member B	5	1	0	0	1	0	hsa-miR-638	-0.2	-0.2	N/A
CNOT8	ENST00000285896.6	CCR4-NOT transcription complex, subunit 8	319	1	0	0	1	0	hsa-miR-638	-0.2	-0.2	N/A
NDOR1	ENST00000427047.2	NADPH dependent diflavin oxidoreductase 1	1044	1	0	0	1	0	hsa-miR-638	-0.2	-0.2	N/A
ANKRD34C	ENST00000421388.2	ankyrin repeat domain 34C	5	1	0	0	1	1	hsa-miR-638	-0.2	-0.2	N/A
TRIM21	ENST00000254436.7	tripartite motif containing 21	5	1	0	0	1	0	hsa-miR-638	-0.2	-0.2	N/A
ITFG3	ENST00000600536.1	Protein ITFG3; Uncharacterized protein; cDNA FLJ60496	5	1	0	0	1	0	hsa-miR-638	-0.2	-0.2	N/A
MYO19	ENST00000431794.3	myosin XIX	615	1	0	0	1	0	hsa-miR-638	-0.2	-0.2	N/A
SLAMF6	ENST00000368059.3	SLAM family member 6	5	1	0	0	1	0	hsa-miR-638	-0.2	-0.2	N/A
PLA2G2F	ENST00000375102.3	phospholipase A2, group IIF	5	1	0	0	1	0	hsa-miR-638	-0.2	-0.2	N/A
AGPAT6	ENST00000396987.3	1-acylglycerol-3-phosphate O-acyltransferase 6	474	1	0	0	1	3	hsa-miR-638	-0.2	-0.22	N/A
ICOSLG	ENST00000407780.3	inducible T-cell co-stimulator ligand	47	1	0	0	1	1	hsa-miR-638	-0.2	-0.2	N/A
CNTNAP3B	ENST00000377564.3	contactin associated protein-like 3B	5	1	0	0	1	1	hsa-miR-638	-0.2	-0.2	N/A
C1QL3	ENST00000298943.3	complement component 1, q subcomponent-like 3	77	1	0	0	1	0	hsa-miR-638	-0.2	-0.2	N/A
NEK9	ENST00000238616.5	NIMA-related kinase 9	733	2	1	0	1	0	hsa-miR-638	-0.19	-0.44	N/A
NIPBL	ENST00000448238.2	Nipped-B homolog (Drosophila)	250	1	0	1	0	1	hsa-miR-638	-0.19	-0.22	N/A
UTRN	ENST00000367545.3	utrophin	87	1	0	0	1	0	hsa-miR-638	-0.19	-0.2	N/A
SORT1	ENST00000256637.6	sortilin 1	2111	1	0	0	1	0	hsa-miR-638	-0.19	-0.21	N/A
PATE1	ENST00000305738.5	prostate and testis expressed 1	5	1	0	0	1	0	hsa-miR-638	-0.19	-0.19	N/A
PROX2	ENST00000556084.2	prospero homeobox 2	5	1	0	0	1	0	hsa-miR-638	-0.19	-0.19	N/A
PPME1	ENST00000328257.8	protein phosphatase methylesterase 1	343	1	0	0	1	0	hsa-miR-638	-0.19	-0.19	N/A
AL591479.1	ENST00000594172.1	Uncharacterized protein	5	1	0	0	1	0	hsa-miR-638	-0.19	-0.19	N/A
SOX13	ENST00000367204.1	SRY (sex determining region Y)-box 13	1061	1	0	0	1	0	hsa-miR-638	-0.19	-0.19	N/A
SLC35A3	ENST00000465289.1	solute carrier family 35 (UDP-N-acetylglucosamine (UDP-GlcNAc) transporter), member A3	191	1	0	0	1	0	hsa-miR-638	-0.19	-0.19	N/A
CELF3	ENST00000290585.4	CUGBP, Elav-like family member 3	5	2	0	0	2	0	hsa-miR-638	-0.19	-0.37	N/A
TAF1L	ENST00000242310.4	TAF1 RNA polymerase II, TATA box binding protein (TBP)-associated factor, 210kDa-like	5	1	0	0	1	0	hsa-miR-638	-0.19	-0.19	N/A
CDRT4	ENST00000312177.6	CMT1A duplicated region transcript 4	109	1	0	0	1	0	hsa-miR-638	-0.19	-0.19	N/A
CEP85	ENST00000252992.4	centrosomal protein 85kDa	471	1	0	0	1	0	hsa-miR-638	-0.19	-0.19	N/A
RAB36	ENST00000263116.2	RAB36, member RAS oncogene family	7	1	0	0	1	1	hsa-miR-638	-0.19	-0.19	N/A
SLC16A2	ENST00000587091.1	solute carrier family 16, member 2 (thyroid hormone transporter)	22	1	0	0	1	1	hsa-miR-638	-0.19	-0.19	N/A
SNW1	ENST00000261531.7	SNW domain containing 1	13	1	0	0	1	0	hsa-miR-638	-0.19	-0.19	N/A
PBRM1	ENST00000356770.4	polybromo 1	689	1	0	0	1	0	hsa-miR-638	-0.19	-0.19	N/A
KLF6	ENST00000542957.1	Kruppel-like factor 6	4644	1	0	1	0	0	hsa-miR-638	-0.19	-0.19	N/A
MPV17L	ENST00000396385.3	MPV17 mitochondrial membrane protein-like	23	1	0	0	1	0	hsa-miR-638	-0.19	-0.25	N/A
FOXC2	ENST00000320354.4	forkhead box C2 (MFH-1, mesenchyme forkhead 1)	665	1	0	0	1	0	hsa-miR-638	-0.19	-0.19	N/A
RFC3	ENST00000380071.3	replication factor C (activator 1) 3, 38kDa	150	1	0	0	1	0	hsa-miR-638	-0.19	-0.24	N/A
RPGR	ENST00000338898.3	retinitis pigmentosa GTPase regulator	72	1	0	0	1	0	hsa-miR-638	-0.19	-0.19	N/A
PEX6	ENST00000244546.4	peroxisomal biogenesis factor 6	178	1	0	0	1	0	hsa-miR-638	-0.19	-0.2	N/A
TMEM139	ENST00000359333.3	transmembrane protein 139	17	2	0	0	2	1	hsa-miR-638	-0.19	-0.56	N/A
GIPC3	ENST00000322315.5	GIPC PDZ domain containing family, member 3	48	1	0	0	1	0	hsa-miR-638	-0.19	-0.19	N/A
KSR2	ENST00000425217.1	kinase suppressor of ras 2	22	2	0	0	2	0	hsa-miR-638	-0.19	-0.19	N/A
AC011897.1	ENST00000581929.1	Uncharacterized protein	12	1	0	0	1	0	hsa-miR-638	-0.19	-0.19	N/A
HIST1H2BD	ENST00000289316.2	histone cluster 1, H2bd	236	1	0	0	1	0	hsa-miR-638	-0.19	-0.19	N/A
FSTL1	ENST00000295633.3	follistatin-like 1	6788	1	0	0	1	0	hsa-miR-638	-0.19	-0.19	N/A
C5AR2	ENST00000595464.1	complement component 5a receptor 2	5	1	0	0	1	1	hsa-miR-638	-0.19	-0.19	N/A
TTC17	ENST00000039989.4	tetratricopeptide repeat domain 17	27	1	0	0	1	0	hsa-miR-638	-0.19	-0.22	N/A
FRRS1L	ENST00000561981.2	ferric-chelate reductase 1-like	11	2	0	1	1	0	hsa-miR-638	-0.19	-0.19	N/A
DBT	ENST00000370132.4	dihydrolipoamide branched chain transacylase E2	117	3	1	0	2	2	hsa-miR-638	-0.19	-0.43	N/A
NNT	ENST00000264663.5	nicotinamide nucleotide transhydrogenase	2771	1	0	0	1	0	hsa-miR-638	-0.19	-0.19	N/A
SMYD1	ENST00000419482.2	SET and MYND domain containing 1	5	1	0	0	1	2	hsa-miR-638	-0.19	-0.19	N/A
CHRM3	ENST00000255380.4	cholinergic receptor, muscarinic 3	47	1	0	0	1	1	hsa-miR-638	-0.19	-0.19	N/A
PRR18	ENST00000322583.3	proline rich 18	15	1	0	0	1	0	hsa-miR-638	-0.19	-0.19	N/A
MKRN1	ENST00000255977.2	makorin ring finger protein 1	5	1	0	0	1	0	hsa-miR-638	-0.19	-0.19	N/A
BABAM1	ENST00000598188.1	BRISC and BRCA1 A complex member 1	419	1	0	0	1	0	hsa-miR-638	-0.19	-0.19	N/A
CASP14	ENST00000427043.3	caspase 14, apoptosis-related cysteine peptidase	5	1	0	0	1	0	hsa-miR-638	-0.19	-0.19	N/A
C1orf200	ENST00000377320.3	chromosome 1 open reading frame 200	5	1	0	0	1	0	hsa-miR-638	-0.19	-0.19	N/A
AMIGO1	ENST00000369864.4	adhesion molecule with Ig-like domain 1	167	1	0	1	0	0	hsa-miR-638	-0.19	-0.19	N/A
ABLIM2	ENST00000361737.5	actin binding LIM protein family, member 2	78	1	0	0	1	0	hsa-miR-638	-0.19	-0.2	N/A
BUB3	ENST00000368865.4	BUB3 mitotic checkpoint protein	5237	1	0	0	1	0	hsa-miR-638	-0.19	-0.22	N/A
GPR37L1	ENST00000367282.5	G protein-coupled receptor 37 like 1	5	2	0	0	2	1	hsa-miR-638	-0.19	-0.19	N/A
EMR1	ENST00000250572.8	egf-like module containing, mucin-like, hormone receptor-like 1	6	1	0	0	1	0	hsa-miR-638	-0.19	-0.19	N/A
DHX35	ENST00000252011.3	DEAH (Asp-Glu-Ala-His) box polypeptide 35	58	1	0	0	1	0	hsa-miR-638	-0.19	-0.19	N/A
SOGA3	ENST00000556132.1	SOGA family member 3	95	2	0	0	2	0	hsa-miR-638	-0.19	-0.19	N/A
PDAP1	ENST00000350498.3	PDGFA associated protein 1	208	1	0	0	1	0	hsa-miR-638	-0.19	-0.19	N/A
XIRP1	ENST00000396251.1	xin actin-binding repeat containing 1	5	1	0	0	1	0	hsa-miR-638	-0.19	-0.19	N/A
GARNL3	ENST00000314904.5	GTPase activating Rap/RanGAP domain-like 3	117	1	0	0	1	0	hsa-miR-638	-0.19	-0.19	N/A
DYM	ENST00000442713.2	dymeclin	547	1	0	0	1	0	hsa-miR-638	-0.19	-0.2	N/A
GABRB3	ENST00000311550.5	gamma-aminobutyric acid (GABA) A receptor, beta 3	267	1	0	0	1	0	hsa-miR-638	-0.19	-0.2	N/A
CCNF	ENST00000397066.4	cyclin F	1432	1	0	0	1	1	hsa-miR-638	-0.19	-0.19	N/A
SDHAF2	ENST00000543265.1	succinate dehydrogenase complex assembly factor 2	545	1	0	0	1	2	hsa-miR-638	-0.19	-0.3	N/A
TRIM68	ENST00000300747.5	tripartite motif containing 68	98	1	0	0	1	0	hsa-miR-638	-0.19	-0.19	N/A
DHX37	ENST00000544745.1	DEAH (Asp-Glu-Ala-His) box polypeptide 37	63	1	0	1	0	0	hsa-miR-638	-0.19	-0.19	N/A
SFN	ENST00000339276.4	stratifin	5	1	0	0	1	0	hsa-miR-638	-0.19	-0.19	N/A
ZNF784	ENST00000591479.1	zinc finger protein 784	19	1	0	0	1	0	hsa-miR-638	-0.19	-0.26	N/A
GPR64	ENST00000379873.2	G protein-coupled receptor 64	175	1	0	0	1	0	hsa-miR-638	-0.19	-0.19	N/A
RAB30	ENST00000533486.1	RAB30, member RAS oncogene family	274	1	0	0	1	2	hsa-miR-638	-0.19	-0.23	N/A
CACNA1E	ENST00000526775.1	calcium channel, voltage-dependent, R type, alpha 1E subunit	5	3	0	0	3	0	hsa-miR-638	-0.18	-0.18	N/A
TNK1	ENST00000570896.1	tyrosine kinase, non-receptor, 1	51	1	0	0	1	0	hsa-miR-638	-0.18	-0.18	N/A
DNAH10OS	ENST00000514254.2	dynein, axonemal, heavy chain 10 opposite strand	89	1	0	0	1	2	hsa-miR-638	-0.18	-0.18	N/A
DCAF4L2	ENST00000319675.3	DDB1 and CUL4 associated factor 4-like 2	10	1	0	0	1	0	hsa-miR-638	-0.18	-0.18	N/A
Z98049.1	ENST00000598601.1	CDNA FLJ25492 fis, clone CBR01389; Uncharacterized protein	5	1	0	0	1	0	hsa-miR-638	-0.18	-0.18	N/A
C11orf82	ENST00000528759.1	chromosome 11 open reading frame 82	579	1	0	0	1	0	hsa-miR-638	-0.18	-0.18	N/A
MMP25	ENST00000336577.4	matrix metallopeptidase 25	5	1	0	0	1	0	hsa-miR-638	-0.18	-0.18	N/A
DEF6	ENST00000316637.5	differentially expressed in FDCP 6 homolog (mouse)	35	1	0	0	1	0	hsa-miR-638	-0.18	-0.18	N/A
IKZF1	ENST00000331340.3	IKAROS family zinc finger 1 (Ikaros)	11	2	0	0	2	1	hsa-miR-638	-0.18	-0.42	N/A
PRRG2	ENST00000246794.5	proline rich Gla (G-carboxyglutamic acid) 2	8	1	0	1	0	0	hsa-miR-638	-0.18	-0.31	N/A
DAB1	ENST00000371236.2	Dab, reelin signal transducer, homolog 1 (Drosophila)	490	1	0	0	1	0	hsa-miR-638	-0.18	-0.18	N/A
CLASP2	ENST00000539981.1	cytoplasmic linker associated protein 2	554	1	0	0	1	1	hsa-miR-638	-0.18	-0.18	N/A
ZNF146	ENST00000443387.2	zinc finger protein 146	3086	1	0	0	1	0	hsa-miR-638	-0.18	-0.18	N/A
MID1	ENST00000453318.2	midline 1 (Opitz/BBB syndrome)	677	1	0	0	1	0	hsa-miR-638	-0.18	-0.18	N/A
KLHL29	ENST00000486442.1	kelch-like family member 29	414	1	0	1	0	1	hsa-miR-638	-0.18	-0.18	N/A
TEK	ENST00000380036.4	TEK tyrosine kinase, endothelial	1007	1	0	0	1	0	hsa-miR-638	-0.18	-0.18	N/A
PPTC7	ENST00000354300.3	PTC7 protein phosphatase homolog (S. cerevisiae)	817	1	0	0	1	0	hsa-miR-638	-0.18	-0.18	N/A
NXF1	ENST00000531709.2	nuclear RNA export factor 1	1017	1	0	0	1	1	hsa-miR-638	-0.18	-0.18	N/A
TAF1D	ENST00000448108.2	TATA box binding protein (TBP)-associated factor, RNA polymerase I, D, 41kDa	132	1	0	0	1	1	hsa-miR-638	-0.18	-0.25	N/A
SLX4IP	ENST00000334534.5	SLX4 interacting protein	0	1	0	0	1	1	hsa-miR-638	-0.18	-0.18	N/A
TRH	ENST00000302649.3	thyrotropin-releasing hormone	5	1	0	0	1	1	hsa-miR-638	-0.18	-0.18	N/A
FBXO45	ENST00000311630.6	F-box protein 45	72	1	0	0	1	0	hsa-miR-638	-0.18	-0.18	N/A
CSRNP3	ENST00000314499.7	cysteine-serine-rich nuclear protein 3	24	1	0	0	1	2	hsa-miR-638	-0.18	-0.18	N/A
GIMAP5	ENST00000358647.3	GTPase, IMAP family member 5	5	1	0	0	1	0	hsa-miR-638	-0.18	-0.18	N/A
IL17REL	ENST00000389983.2	interleukin 17 receptor E-like	5	1	0	0	1	0	hsa-miR-638	-0.18	-0.18	N/A
SLC25A37	ENST00000519973.1	solute carrier family 25 (mitochondrial iron transporter), member 37	145	1	0	0	1	0	hsa-miR-638	-0.18	-0.18	N/A
ERN2	ENST00000457008.2	endoplasmic reticulum to nucleus signaling 2	5	1	0	0	1	0	hsa-miR-638	-0.18	-0.18	N/A
EXOC6B	ENST00000272427.6	exocyst complex component 6B	106	1	0	0	1	1	hsa-miR-638	-0.18	-0.18	N/A
ABCF1	ENST00000326195.8	ATP-binding cassette, sub-family F (GCN20), member 1	1078	1	0	0	1	1	hsa-miR-638	-0.18	-0.23	N/A
CCND1	ENST00000227507.2	cyclin D1	4687	1	1	0	0	0	hsa-miR-638	-0.18	-0.19	N/A
ABCC12	ENST00000416054.1	ATP-binding cassette, sub-family C (CFTR/MRP), member 12	5	1	0	0	1	1	hsa-miR-638	-0.18	-0.18	N/A
VEGFA	ENST00000417285.2	vascular endothelial growth factor A	907	1	0	1	0	0	hsa-miR-638	-0.18	-0.21	N/A
GPX6	ENST00000361902.1	glutathione peroxidase 6 (olfactory)	5	1	0	0	1	0	hsa-miR-638	-0.18	-0.18	N/A
IST1	ENST00000329908.8	increased sodium tolerance 1 homolog (yeast)	305	1	0	0	1	0	hsa-miR-638	-0.18	-0.18	N/A
AQP5	ENST00000293599.6	aquaporin 5	10	1	0	0	1	0	hsa-miR-638	-0.18	-0.18	N/A
GPR82	ENST00000302548.4	G protein-coupled receptor 82	5	1	0	0	1	0	hsa-miR-638	-0.18	-0.18	N/A
HIATL2	ENST00000602917.1	hippocampus abundant transcript-like 2	111	1	0	0	1	0	hsa-miR-638	-0.18	-0.19	N/A
SHISA9	ENST00000558583.1	shisa family member 9	5	1	0	0	1	2	hsa-miR-638	-0.18	-0.18	N/A
FAM168A	ENST00000064778.4	family with sequence similarity 168, member A	68	2	0	0	2	1	hsa-miR-638	-0.18	-0.21	N/A
ZNF518B	ENST00000326756.3	zinc finger protein 518B	95	1	0	1	0	1	hsa-miR-638	-0.18	-0.19	N/A
DDX31	ENST00000372159.3	DEAD (Asp-Glu-Ala-Asp) box polypeptide 31	174	1	0	0	1	1	hsa-miR-638	-0.18	-0.2	N/A
GINS4	ENST00000523277.2	GINS complex subunit 4 (Sld5 homolog)	500	1	0	0	1	0	hsa-miR-638	-0.18	-0.19	N/A
TUSC5	ENST00000333813.3	tumor suppressor candidate 5	5	1	0	0	1	0	hsa-miR-638	-0.18	-0.18	N/A
CLDN18	ENST00000343735.4	claudin 18	5	1	0	0	1	0	hsa-miR-638	-0.18	-0.18	N/A
ABHD15	ENST00000307201.4	abhydrolase domain containing 15	240	2	0	0	2	0	hsa-miR-638	-0.18	-0.35	N/A
P2RX6	ENST00000402329.3	purinergic receptor P2X, ligand-gated ion channel, 6	10	1	0	0	1	0	hsa-miR-638	-0.18	-0.18	N/A
SLC41A1	ENST00000367137.3	solute carrier family 41 (magnesium transporter), member 1	300	1	0	0	1	0	hsa-miR-638	-0.18	-0.18	N/A
RNF152	ENST00000312828.3	ring finger protein 152	57	1	0	0	1	0	hsa-miR-638	-0.18	-0.18	N/A
POLR1D	ENST00000399697.3	polymerase (RNA) I polypeptide D, 16kDa	2372	1	0	0	1	0	hsa-miR-638	-0.18	-0.27	N/A
GAB3	ENST00000369575.3	GRB2-associated binding protein 3	39	1	0	0	1	0	hsa-miR-638	-0.18	-0.18	N/A
FAM46B	ENST00000289166.5	family with sequence similarity 46, member B	18	1	0	0	1	0	hsa-miR-638	-0.18	-0.18	N/A
TMEM231	ENST00000258173.6	transmembrane protein 231	243	1	0	0	1	0	hsa-miR-638	-0.18	-0.18	N/A
KCNA7	ENST00000221444.1	potassium voltage-gated channel, shaker-related subfamily, member 7	11	1	0	0	1	1	hsa-miR-638	-0.18	-0.18	N/A
ATXN1L	ENST00000427980.2	ataxin 1-like	12	1	0	0	1	4	hsa-miR-638	-0.18	-0.18	N/A
SENP1	ENST00000004980.5	SUMO1/sentrin specific peptidase 1	361	1	0	0	1	1	hsa-miR-638	-0.18	-0.18	N/A
FAM153B	ENST00000253490.4	family with sequence similarity 153, member B	5	1	0	0	1	0	hsa-miR-638	-0.17	-0.17	N/A
PEG10	ENST00000482108.1	paternally expressed 10	8778	1	0	0	1	0	hsa-miR-638	-0.17	-0.17	N/A
MAMLD1	ENST00000370401.2	mastermind-like domain containing 1	1442	1	0	0	1	0	hsa-miR-638	-0.17	-0.17	N/A
FAM184B	ENST00000265018.3	family with sequence similarity 184, member B	22	1	0	0	1	1	hsa-miR-638	-0.17	-0.18	N/A
DCUN1D1	ENST00000292782.4	DCN1, defective in cullin neddylation 1, domain containing 1	267	1	0	0	1	1	hsa-miR-638	-0.17	-0.2	N/A
CTD-2267D19.3	ENST00000578774.1	Uncharacterized protein	110	1	0	0	1	1	hsa-miR-638	-0.17	-0.17	N/A
EPT1	ENST00000260585.7	ethanolaminephosphotransferase 1 (CDP-ethanolamine-specific)	449	2	0	0	2	0	hsa-miR-638	-0.17	-0.2	N/A
AC002451.1	ENST00000601424.1	Protein LOC100996577	5	1	0	0	1	0	hsa-miR-638	-0.17	-0.17	N/A
TMEM239	ENST00000361033.1	transmembrane protein 239	5	1	0	0	1	1	hsa-miR-638	-0.17	-0.17	N/A
CBLN3	ENST00000267406.6	cerebellin 3 precursor	30	1	0	0	1	0	hsa-miR-638	-0.17	-0.17	N/A
CYP11B2	ENST00000323110.2	cytochrome P450, family 11, subfamily B, polypeptide 2	5	1	0	0	1	0	hsa-miR-638	-0.17	-0.17	N/A
TET2	ENST00000545826.1	tet methylcytosine dioxygenase 2	558	1	0	0	1	1	hsa-miR-638	-0.17	-0.17	N/A
AGPAT4	ENST00000366911.5	1-acylglycerol-3-phosphate O-acyltransferase 4	142	1	0	0	1	1	hsa-miR-638	-0.17	-0.17	N/A
RAD51L3-RFFL	ENST00000593039.1	Uncharacterized protein	670	1	0	0	1	0	hsa-miR-638	-0.17	-0.21	N/A
ELF2	ENST00000394235.2	E74-like factor 2 (ets domain transcription factor)	26	1	0	0	1	0	hsa-miR-638	-0.17	-0.17	N/A
FRMPD4	ENST00000380682.1	FERM and PDZ domain containing 4	25	1	0	0	1	0	hsa-miR-638	-0.17	-0.17	N/A
PPP1R15B	ENST00000367188.4	protein phosphatase 1, regulatory subunit 15B	2154	1	0	0	1	0	hsa-miR-638	-0.17	-0.17	N/A
OVOL1	ENST00000335987.3	ovo-like 1(Drosophila)	5	1	0	0	1	0	hsa-miR-638	-0.17	-0.17	N/A
SYT17	ENST00000355377.2	synaptotagmin XVII	38	1	0	0	1	0	hsa-miR-638	-0.17	-0.17	N/A
ST8SIA3	ENST00000324000.3	ST8 alpha-N-acetyl-neuraminide alpha-2,8-sialyltransferase 3	5	2	0	0	2	0	hsa-miR-638	-0.17	-0.17	N/A
CDS1	ENST00000295887.5	CDP-diacylglycerol synthase (phosphatidate cytidylyltransferase) 1	720	1	0	0	1	1	hsa-miR-638	-0.17	-0.18	N/A
MXRA7	ENST00000355797.3	matrix-remodelling associated 7	421	1	0	0	1	0	hsa-miR-638	-0.17	-0.22	N/A
MESP1	ENST00000300057.4	mesoderm posterior 1 homolog (mouse)	303	1	0	1	0	0	hsa-miR-638	-0.17	-0.17	N/A
IL2RB	ENST00000216223.5	interleukin 2 receptor, beta	5	1	0	0	1	1	hsa-miR-638	-0.17	-0.17	N/A
CHRDL1	ENST00000372045.1	chordin-like 1	5	2	0	0	2	0	hsa-miR-638	-0.17	-0.31	N/A
BAIAP2	ENST00000435091.3	BAI1-associated protein 2	53	1	0	0	1	0	hsa-miR-638	-0.17	-0.17	N/A
C10orf25	ENST00000298298.1	chromosome 10 open reading frame 25	29	1	0	0	1	0	hsa-miR-638	-0.17	-0.17	N/A
IGF2BP1	ENST00000290341.3	insulin-like growth factor 2 mRNA binding protein 1	460	2	1	0	1	1	hsa-miR-638	-0.17	-0.21	N/A
SHISA7	ENST00000376325.4	shisa family member 7	5	2	0	0	2	2	hsa-miR-638	-0.17	-0.17	N/A
KCNV1	ENST00000524391.1	potassium channel, subfamily V, member 1	5	1	0	0	1	0	hsa-miR-638	-0.17	-0.17	N/A
PPP4R1L	ENST00000334187.8	protein phosphatase 4, regulatory subunit 1-like	27	1	0	0	1	0	hsa-miR-638	-0.17	-0.17	N/A
LRRC15	ENST00000347624.3	leucine rich repeat containing 15	12	1	0	0	1	0	hsa-miR-638	-0.17	-0.17	N/A
ZNF154	ENST00000512439.2	zinc finger protein 154	5	1	0	0	1	1	hsa-miR-638	-0.17	-0.17	N/A
VANGL2	ENST00000368061.2	VANGL planar cell polarity protein 2	560	1	0	0	1	2	hsa-miR-638	-0.17	-0.17	N/A
AC137932.1	ENST00000602042.1		5	1	0	0	1	0	hsa-miR-638	-0.17	-0.17	N/A
UBXN10	ENST00000375099.3	UBX domain protein 10	5	1	0	0	1	1	hsa-miR-638	-0.17	-0.17	N/A
INSR	ENST00000341500.5	insulin receptor	577	1	0	0	1	0	hsa-miR-638	-0.17	-0.18	N/A
RFFL	ENST00000315249.7	ring finger and FYVE-like domain containing E3 ubiquitin protein ligase	670	1	0	0	1	0	hsa-miR-638	-0.17	-0.2	N/A
TEKT1	ENST00000338694.2	tektin 1	5	1	0	0	1	1	hsa-miR-638	-0.17	-0.17	N/A
HOXC8	ENST00000040584.4	homeobox C8	5	1	0	0	1	0	hsa-miR-638	-0.17	-0.17	N/A
SLC44A2	ENST00000586078.1	solute carrier family 44 (choline transporter), member 2	720	1	0	0	1	0	hsa-miR-638	-0.17	-0.17	N/A
PPP5D1	ENST00000414155.1	PPP5 tetratricopeptide repeat domain containing 1	5	1	0	0	1	0	hsa-miR-638	-0.17	-0.17	N/A
LRIG2	ENST00000361127.5	leucine-rich repeats and immunoglobulin-like domains 2	348	1	0	1	0	1	hsa-miR-638	-0.16	-0.18	N/A
ROCK2	ENST00000315872.6	Rho-associated, coiled-coil containing protein kinase 2	142	1	0	0	1	1	hsa-miR-638	-0.16	-0.2	N/A
KIAA1045	ENST00000242315.3	KIAA1045	42	1	0	0	1	0	hsa-miR-638	-0.16	-0.16	N/A
CTD-2368P22.1	ENST00000550135.1	HCG1811579; Uncharacterized protein	25	1	0	0	1	0	hsa-miR-638	-0.16	-0.16	N/A
ETS1	ENST00000531611.1	v-ets avian erythroblastosis virus E26 oncogene homolog 1	1423	1	0	0	1	0	hsa-miR-638	-0.16	-0.17	N/A
TK1	ENST00000301634.7	thymidine kinase 1, soluble	783	1	0	0	1	0	hsa-miR-638	-0.16	-0.16	N/A
CRCP	ENST00000415001.2	CGRP receptor component	1776	2	1	0	1	1	hsa-miR-638	-0.16	-0.51	N/A
GRM5	ENST00000418177.2	glutamate receptor, metabotropic 5	5	1	0	0	1	0	hsa-miR-638	-0.16	-0.16	N/A
EHD3	ENST00000322054.5	EH-domain containing 3	206	2	0	0	2	0	hsa-miR-638	-0.16	-0.2	N/A
LARP4	ENST00000398473.2	La ribonucleoprotein domain family, member 4	35	1	0	0	1	0	hsa-miR-638	-0.16	-0.16	N/A
WWP2	ENST00000359154.2	WW domain containing E3 ubiquitin protein ligase 2	405	1	0	0	1	0	hsa-miR-638	-0.16	-0.16	N/A
RGS17	ENST00000367225.2	regulator of G-protein signaling 17	11	2	0	0	2	0	hsa-miR-638	-0.16	-0.28	N/A
FAM92A1	ENST00000518322.1	family with sequence similarity 92, member A1	80	1	0	0	1	0	hsa-miR-638	-0.16	-0.2	N/A
RHOT2	ENST00000315082.4	ras homolog family member T2	1368	1	0	0	1	0	hsa-miR-638	-0.16	-0.23	N/A
MLEC	ENST00000228506.3	malectin	12084	1	0	0	1	0	hsa-miR-638	-0.16	-0.16	N/A
EPN3	ENST00000268933.3	epsin 3	5	1	0	0	1	1	hsa-miR-638	-0.16	-0.16	N/A
CAMK2A	ENST00000348628.6	calcium/calmodulin-dependent protein kinase II alpha	5	1	0	0	1	0	hsa-miR-638	-0.16	-0.16	N/A
ACSL5	ENST00000354273.4	acyl-CoA synthetase long-chain family member 5	104	1	0	0	1	0	hsa-miR-638	-0.16	-0.25	N/A
CALM3	ENST00000291295.9	calmodulin 3 (phosphorylase kinase, delta)	3982	1	0	0	1	1	hsa-miR-638	-0.16	-0.25	N/A
ACOX1	ENST00000293217.5	acyl-CoA oxidase 1, palmitoyl	287	1	0	0	1	1	hsa-miR-638	-0.16	-0.17	N/A
HNF4G	ENST00000396423.2	hepatocyte nuclear factor 4, gamma	5	1	0	0	1	0	hsa-miR-638	-0.16	-0.16	N/A
ADCY6	ENST00000357869.3	adenylate cyclase 6	6	1	0	0	1	1	hsa-miR-638	-0.16	-0.16	N/A
B3GAT1	ENST00000392580.1	beta-1,3-glucuronyltransferase 1 (glucuronosyltransferase P)	77	1	0	0	1	1	hsa-miR-638	-0.16	-0.16	N/A
CLIP2	ENST00000223398.6	CAP-GLY domain containing linker protein 2	2111	1	0	1	0	0	hsa-miR-638	-0.16	-0.16	N/A
GAD2	ENST00000376261.3	glutamate decarboxylase 2 (pancreatic islets and brain, 65kDa)	5	1	0	0	1	0	hsa-miR-638	-0.16	-0.16	N/A
RAB44	ENST00000229824.8	RAB44, member RAS oncogene family	0	1	0	0	1	0	hsa-miR-638	-0.16	-0.16	N/A
CDK3	ENST00000425876.2	cyclin-dependent kinase 3	109	1	0	0	1	0	hsa-miR-638	-0.16	-0.16	N/A
PRDM15	ENST00000422911.1	PR domain containing 15	328	1	0	0	1	1	hsa-miR-638	-0.16	-0.16	N/A
ADAM12	ENST00000368679.4	ADAM metallopeptidase domain 12	758	1	0	0	1	0	hsa-miR-638	-0.16	-0.16	N/A
CHRFAM7A	ENST00000397827.3	CHRNA7 (cholinergic receptor, nicotinic, alpha 7, exons 5-10) and FAM7A (family with sequence similarity 7A, exons A-E) fusion	5	1	0	0	1	1	hsa-miR-638	-0.16	-0.22	N/A
WNT10B	ENST00000407467.1	wingless-type MMTV integration site family, member 10B	13	1	0	0	1	0	hsa-miR-638	-0.16	-0.27	N/A
PRR15L	ENST00000300557.2	proline rich 15-like	159	1	0	0	1	0	hsa-miR-638	-0.16	-0.16	N/A
CYTH1	ENST00000585509.1	cytohesin 1	553	1	0	1	0	0	hsa-miR-638	-0.16	-0.16	N/A
KCNAB2	ENST00000378097.1	potassium voltage-gated channel, shaker-related subfamily, beta member 2	67	1	0	0	1	0	hsa-miR-638	-0.16	-0.16	N/A
CMKLR1	ENST00000312143.7	chemokine-like receptor 1	5	1	0	0	1	0	hsa-miR-638	-0.16	-0.16	N/A
CNNM2	ENST00000369878.4	cyclin M2	517	1	0	0	1	0	hsa-miR-638	-0.16	-0.17	N/A
MISP	ENST00000215582.6	mitotic spindle positioning	23	1	0	0	1	0	hsa-miR-638	-0.16	-0.22	N/A
CD83	ENST00000379153.3	CD83 molecule	414	1	0	0	1	0	hsa-miR-638	-0.16	-0.16	N/A
AGBL4	ENST00000371839.1	ATP/GTP binding protein-like 4	5	1	0	0	1	0	hsa-miR-638	-0.16	-0.16	N/A
SULT2A1	ENST00000222002.3	sulfotransferase family, cytosolic, 2A, dehydroepiandrosterone (DHEA)-preferring, member 1	35	1	0	0	1	1	hsa-miR-638	-0.16	-0.21	N/A
DTX3L	ENST00000296161.4	deltex 3-like (Drosophila)	319	1	0	1	0	0	hsa-miR-638	-0.16	-0.16	N/A
RAN	ENST00000543796.1	RAN, member RAS oncogene family	1418	1	0	0	1	0	hsa-miR-638	-0.16	-0.2	N/A
DOCK5	ENST00000276440.7	dedicator of cytokinesis 5	504	1	0	0	1	0	hsa-miR-638	-0.15	-0.15	N/A
GALNT13	ENST00000409237.1	UDP-N-acetyl-alpha-D-galactosamine:polypeptide N-acetylgalactosaminyltransferase 13 (GalNAc-T13)	49	1	0	0	1	0	hsa-miR-638	-0.15	-0.15	N/A
NLRP1	ENST00000262467.5	NLR family, pyrin domain containing 1	547	1	0	0	1	1	hsa-miR-638	-0.15	-0.16	N/A
F8	ENST00000330287.6	coagulation factor VIII, procoagulant component	16	1	0	0	1	1	hsa-miR-638	-0.15	-0.25	N/A
EPHA7	ENST00000369303.4	EPH receptor A7	213	1	0	0	1	0	hsa-miR-638	-0.15	-0.16	N/A
KLHL18	ENST00000232766.5	kelch-like family member 18	74	1	0	0	1	0	hsa-miR-638	-0.15	-0.15	N/A
LIF	ENST00000403987.3	leukemia inhibitory factor	55	1	0	0	1	1	hsa-miR-638	-0.15	-0.17	N/A
F13A1	ENST00000264870.3	coagulation factor XIII, A1 polypeptide	5	1	0	0	1	0	hsa-miR-638	-0.15	-0.15	N/A
CNR2	ENST00000374472.4	cannabinoid receptor 2 (macrophage)	5	1	0	0	1	0	hsa-miR-638	-0.15	-0.15	N/A
SIN3B	ENST00000379803.1	SIN3 transcription regulator family member B	1084	1	0	0	1	0	hsa-miR-638	-0.15	-0.15	N/A
MZF1	ENST00000594234.1	myeloid zinc finger 1	482	1	0	1	0	0	hsa-miR-638	-0.15	-0.15	N/A
SORBS1	ENST00000371227.4	sorbin and SH3 domain containing 1	22	1	0	0	1	0	hsa-miR-638	-0.15	-0.15	N/A
CCDC69	ENST00000355417.2	coiled-coil domain containing 69	22	1	0	0	1	0	hsa-miR-638	-0.15	-0.18	N/A
IQSEC1	ENST00000273221.4	IQ motif and Sec7 domain 1	415	1	0	0	1	0	hsa-miR-638	-0.15	-0.21	N/A
ZBTB21	ENST00000398505.3	zinc finger and BTB domain containing 21	802	1	0	0	1	0	hsa-miR-638	-0.15	-0.16	N/A
ZBTB4	ENST00000380599.4	zinc finger and BTB domain containing 4	1039	1	0	0	1	0	hsa-miR-638	-0.15	-0.15	N/A
SVOP	ENST00000299134.5	SV2 related protein homolog (rat)	8	1	0	0	1	0	hsa-miR-638	-0.15	-0.15	N/A
CHRNA2	ENST00000407991.1	cholinergic receptor, nicotinic, alpha 2 (neuronal)	5	1	0	0	1	0	hsa-miR-638	-0.15	-0.15	N/A
CACNA1I	ENST00000402142.3	calcium channel, voltage-dependent, T type, alpha 1I subunit	5	2	1	0	1	0	hsa-miR-638	-0.15	-0.15	N/A
DUSP28	ENST00000405954.1	dual specificity phosphatase 28	84	1	0	0	1	1	hsa-miR-638	-0.15	-0.22	N/A
FBXL16	ENST00000397621.1	F-box and leucine-rich repeat protein 16	5	1	0	0	1	0	hsa-miR-638	-0.15	-0.15	N/A
MAU2	ENST00000262815.8	MAU2 sister chromatid cohesion factor	5234	1	0	0	1	0	hsa-miR-638	-0.15	-0.15	N/A
GPR83	ENST00000243673.2	G protein-coupled receptor 83	33	1	0	0	1	1	hsa-miR-638	-0.15	-0.15	N/A
BCAS1	ENST00000371440.3	breast carcinoma amplified sequence 1	0	1	0	0	1	0	hsa-miR-638	-0.15	-0.15	N/A
SYT13	ENST00000020926.3	synaptotagmin XIII	5	1	1	0	0	0	hsa-miR-638	-0.15	-0.15	N/A
KIF20B	ENST00000416354.1	kinesin family member 20B	23	1	0	0	1	0	hsa-miR-638	-0.15	-0.23	N/A
TAP2	ENST00000374897.2	transporter 2, ATP-binding cassette, sub-family B (MDR/TAP)	466	1	0	0	1	0	hsa-miR-638	-0.15	-0.15	N/A
MKLN1	ENST00000352689.6	muskelin 1, intracellular mediator containing kelch motifs	477	2	0	0	2	1	hsa-miR-638	-0.15	-0.23	N/A
PIGL	ENST00000225609.5	phosphatidylinositol glycan anchor biosynthesis, class L	45	1	0	0	1	1	hsa-miR-638	-0.15	-0.27	N/A
ZNF862	ENST00000223210.4	zinc finger protein 862	7	1	0	0	1	0	hsa-miR-638	-0.15	-0.15	N/A
ATMIN	ENST00000299575.4	ATM interactor	129	1	0	0	1	0	hsa-miR-638	-0.15	-0.15	N/A
EHF	ENST00000257831.3	ets homologous factor	5	1	0	0	1	0	hsa-miR-638	-0.15	-0.15	N/A
MTMR3	ENST00000333027.3	myotubularin related protein 3	123	2	0	0	2	0	hsa-miR-638	-0.15	-0.16	N/A
DUSP9	ENST00000370167.4	dual specificity phosphatase 9	3766	1	0	0	1	0	hsa-miR-638	-0.15	-0.15	N/A
LRRC2	ENST00000395905.3	leucine rich repeat containing 2	5	1	0	0	1	0	hsa-miR-638	-0.15	-0.15	N/A
PUS10	ENST00000398658.2	pseudouridylate synthase 10	72	1	0	0	1	0	hsa-miR-638	-0.15	-0.15	N/A
TMEM44	ENST00000381975.3	transmembrane protein 44	45	1	0	0	1	0	hsa-miR-638	-0.15	-0.15	N/A
CPLX2	ENST00000359546.4	complexin 2	5	1	0	0	1	2	hsa-miR-638	-0.15	-0.15	N/A
KDSR	ENST00000406396.3	3-ketodihydrosphingosine reductase	322	1	0	0	1	0	hsa-miR-638	-0.15	-0.16	N/A
SEPT4	ENST00000426861.1	septin 4	40	1	0	0	1	0	hsa-miR-638	-0.15	-0.15	N/A
HOMER1	ENST00000508576.1	homer homolog 1 (Drosophila)	394	1	0	0	1	0	hsa-miR-638	-0.15	-0.17	N/A
MYEF2	ENST00000324324.7	myelin expression factor 2	358	1	0	0	1	0	hsa-miR-638	-0.14	-0.15	N/A
ASH1L	ENST00000368346.3	ash1 (absent, small, or homeotic)-like (Drosophila)	56	1	0	0	1	2	hsa-miR-638	-0.14	-0.14	N/A
UTP14C	ENST00000521776.2	UTP14, U3 small nucleolar ribonucleoprotein, homolog C (yeast)	174	1	0	0	1	0	hsa-miR-638	-0.14	-0.14	N/A
CHRNB4	ENST00000261751.3	cholinergic receptor, nicotinic, beta 4 (neuronal)	5	1	0	0	1	0	hsa-miR-638	-0.14	-0.14	N/A
CASP16	ENST00000428155.1	caspase 16, apoptosis-related cysteine peptidase (putative)	51	1	0	0	1	0	hsa-miR-638	-0.14	-0.14	N/A
APLNR	ENST00000606794.1	apelin receptor	5	1	0	0	1	1	hsa-miR-638	-0.14	-0.14	N/A
GALNT12	ENST00000375011.3	UDP-N-acetyl-alpha-D-galactosamine:polypeptide N-acetylgalactosaminyltransferase 12 (GalNAc-T12)	73	1	0	0	1	0	hsa-miR-638	-0.14	-0.18	N/A
PTGIR	ENST00000291294.2	prostaglandin I2 (prostacyclin) receptor (IP)	20	1	0	0	1	0	hsa-miR-638	-0.14	-0.14	N/A
SLC25A22	ENST00000320230.5	solute carrier family 25 (mitochondrial carrier: glutamate), member 22	319	1	0	1	0	0	hsa-miR-638	-0.14	-0.14	N/A
ITGAL	ENST00000356798.6	integrin, alpha L (antigen CD11A (p180), lymphocyte function-associated antigen 1; alpha polypeptide)	340	1	0	0	1	0	hsa-miR-638	-0.14	-0.14	N/A
MEX3B	ENST00000558133.1	mex-3 RNA binding family member B	1401	1	0	0	1	0	hsa-miR-638	-0.14	-0.14	N/A
GPR107	ENST00000372410.3	G protein-coupled receptor 107	1429	1	0	0	1	0	hsa-miR-638	-0.14	-0.17	N/A
CBX5	ENST00000209875.4	chromobox homolog 5	360	2	0	0	2	0	hsa-miR-638	-0.14	-0.37	N/A
MAP7D1	ENST00000316156.4	MAP7 domain containing 1	1052	1	0	0	1	0	hsa-miR-638	-0.14	-0.14	N/A
CCNJL	ENST00000393977.3	cyclin J-like	66	1	0	0	1	0	hsa-miR-638	-0.14	-0.17	N/A
SZRD1	ENST00000401089.3	SUZ RNA binding domain containing 1	137	1	0	0	1	2	hsa-miR-638	-0.14	-0.27	N/A
KMO	ENST00000366559.4	kynurenine 3-monooxygenase (kynurenine 3-hydroxylase)	5	1	0	0	1	0	hsa-miR-638	-0.14	-0.14	N/A
CENPL	ENST00000356198.2	centromere protein L	390	1	0	0	1	0	hsa-miR-638	-0.14	-0.14	N/A
RASA4	ENST00000262940.7	RAS p21 protein activator 4	5	1	0	0	1	1	hsa-miR-638	-0.14	-0.14	N/A
SMYD5	ENST00000389501.4	SMYD family member 5	344	1	0	0	1	0	hsa-miR-638	-0.14	-0.14	N/A
RGMB	ENST00000308234.7	RGM domain family, member B	6087	1	0	0	1	0	hsa-miR-638	-0.14	-0.18	N/A
GDPD5	ENST00000443276.2	glycerophosphodiester phosphodiesterase domain containing 5	8	1	0	0	1	0	hsa-miR-638	-0.14	-0.14	N/A
CFL1	ENST00000525451.2	cofilin 1 (non-muscle)	341	1	0	0	1	0	hsa-miR-638	-0.14	-0.14	N/A
TAS1R3	ENST00000339381.5	taste receptor, type 1, member 3	7	1	0	1	0	0	hsa-miR-638	-0.14	-0.14	N/A
MSRB3	ENST00000308259.5	methionine sulfoxide reductase B3	83	1	0	0	1	0	hsa-miR-638	-0.14	-0.14	N/A
TRIM2	ENST00000338700.5	tripartite motif containing 2	22	1	0	0	1	0	hsa-miR-638	-0.14	-0.14	N/A
HPCAL4	ENST00000372844.3	hippocalcin like 4	5	1	0	0	1	0	hsa-miR-638	-0.14	-0.14	N/A
CORO2B	ENST00000261861.5	coronin, actin binding protein, 2B	751	1	0	0	1	1	hsa-miR-638	-0.14	-0.14	N/A
RAET1E	ENST00000532335.1	retinoic acid early transcript 1E	129	1	0	1	0	1	hsa-miR-638	-0.14	-0.15	N/A
ALS2	ENST00000457679.2	amyotrophic lateral sclerosis 2 (juvenile)	206	1	0	1	0	0	hsa-miR-638	-0.14	-0.15	N/A
EDEM3	ENST00000318130.8	ER degradation enhancer, mannosidase alpha-like 3	535	1	0	0	1	0	hsa-miR-638	-0.14	-0.14	N/A
MTMR12	ENST00000280285.5	myotubularin related protein 12	156	1	0	0	1	2	hsa-miR-638	-0.14	-0.2	N/A
RASSF5	ENST00000367117.3	Ras association (RalGDS/AF-6) domain family member 5	27	1	0	0	1	0	hsa-miR-638	-0.14	-0.17	N/A
SPRED3	ENST00000587013.1	sprouty-related, EVH1 domain containing 3	42	1	0	0	1	2	hsa-miR-638	-0.14	-0.16	N/A
CSF1R	ENST00000286301.3	colony stimulating factor 1 receptor	5	1	0	0	1	0	hsa-miR-638	-0.14	-0.14	N/A
C17orf107	ENST00000381365.3	chromosome 17 open reading frame 107	11	1	1	0	0	0	hsa-miR-638	-0.14	-0.14	N/A
LIMD1	ENST00000273317.4	LIM domains containing 1	1092	1	0	0	1	1	hsa-miR-638	-0.14	-0.16	N/A
KIAA1211	ENST00000504228.1	KIAA1211	631	1	0	0	1	0	hsa-miR-638	-0.14	-0.14	N/A
CNNM4	ENST00000540067.1	cyclin M4	1249	1	0	0	1	0	hsa-miR-638	-0.14	-0.14	N/A
ZBTB33	ENST00000326624.2	zinc finger and BTB domain containing 33	65	1	0	1	0	0	hsa-miR-638	-0.14	-0.15	N/A
GRAP	ENST00000284154.5	GRB2-related adaptor protein	5	1	0	0	1	0	hsa-miR-638	-0.14	-0.14	N/A
SCUBE1	ENST00000290460.7	signal peptide, CUB domain, EGF-like 1	7	1	0	0	1	0	hsa-miR-638	-0.14	-0.14	N/A
ZNF711	ENST00000360700.4	zinc finger protein 711	5614	1	0	0	1	0	hsa-miR-638	-0.14	-0.14	N/A
LPCAT2	ENST00000262134.5	lysophosphatidylcholine acyltransferase 2	360	1	0	0	1	0	hsa-miR-638	-0.14	-0.16	N/A
CTB-186H2.3	ENST00000591669.1	Uncharacterized protein	5	1	0	0	1	0	hsa-miR-638	-0.14	-0.14	N/A
NEU3	ENST00000532963.1	sialidase 3 (membrane sialidase)	243	1	0	0	1	0	hsa-miR-638	-0.14	-0.14	N/A
C9orf66	ENST00000382387.2	chromosome 9 open reading frame 66	13	1	0	0	1	0	hsa-miR-638	-0.14	-0.14	N/A
TSHZ3	ENST00000240587.4	teashirt zinc finger homeobox 3	81	1	0	0	1	0	hsa-miR-638	-0.14	-0.22	N/A
HUNK	ENST00000270112.2	hormonally up-regulated Neu-associated kinase	85	1	0	0	1	0	hsa-miR-638	-0.14	-0.15	N/A
SLCO5A1	ENST00000260126.4	solute carrier organic anion transporter family, member 5A1	9	1	0	0	1	1	hsa-miR-638	-0.14	-0.14	N/A
SLC12A4	ENST00000422611.2	solute carrier family 12 (potassium/chloride transporter), member 4	1618	1	0	0	1	0	hsa-miR-638	-0.14	-0.14	N/A
CRAMP1L	ENST00000397412.3	Crm, cramped-like (Drosophila)	731	1	0	0	1	0	hsa-miR-638	-0.14	-0.14	N/A
COL5A3	ENST00000264828.3	collagen, type V, alpha 3	5	1	0	0	1	0	hsa-miR-638	-0.14	-0.14	N/A
LIMK1	ENST00000418310.1	LIM domain kinase 1	464	1	0	0	1	0	hsa-miR-638	-0.14	-0.14	N/A
MGRN1	ENST00000415496.1	mahogunin ring finger 1, E3 ubiquitin protein ligase	2337	1	1	0	0	0	hsa-miR-638	-0.14	-0.14	N/A
TMOD2	ENST00000249700.4	tropomodulin 2 (neuronal)	117	1	0	0	1	0	hsa-miR-638	-0.14	-0.16	N/A
GAS8	ENST00000268699.4	growth arrest-specific 8	526	1	0	0	1	0	hsa-miR-638	-0.14	-0.14	N/A
GPR155	ENST00000392552.2	G protein-coupled receptor 155	11	1	0	0	1	0	hsa-miR-638	-0.14	-0.14	N/A
GPR144	ENST00000334810.1	G protein-coupled receptor 144	5	1	0	0	1	0	hsa-miR-638	-0.14	-0.14	N/A
NKX3-2	ENST00000382438.5	NK3 homeobox 2	36	1	0	0	1	0	hsa-miR-638	-0.14	-0.2	N/A
THRA	ENST00000450525.2	thyroid hormone receptor, alpha	547	1	0	0	1	0	hsa-miR-638	-0.14	-0.14	N/A
NLRP13	ENST00000588751.1	NLR family, pyrin domain containing 13	5	1	0	0	1	0	hsa-miR-638	-0.14	-0.14	N/A
CYP11B1	ENST00000292427.4	cytochrome P450, family 11, subfamily B, polypeptide 1	5	1	0	0	1	0	hsa-miR-638	-0.14	-0.14	N/A
MEGF11	ENST00000360698.4	multiple EGF-like-domains 11	7	1	0	0	1	0	hsa-miR-638	-0.14	-0.14	N/A
VPS39	ENST00000318006.5	vacuolar protein sorting 39 homolog (S. cerevisiae)	165	1	0	0	1	1	hsa-miR-638	-0.14	-0.19	N/A
DSCR3	ENST00000309117.6	Down syndrome critical region gene 3	494	1	0	1	0	0	hsa-miR-638	-0.14	-0.2	N/A
EYA4	ENST00000367895.5	eyes absent homolog 4 (Drosophila)	242	1	0	0	1	0	hsa-miR-638	-0.14	-0.15	N/A
DACT1	ENST00000395153.3	dishevelled-binding antagonist of beta-catenin 1	248	1	0	0	1	0	hsa-miR-638	-0.14	-0.14	N/A
DLG2	ENST00000398309.2	discs, large homolog 2 (Drosophila)	15	1	0	0	1	0	hsa-miR-638	-0.14	-0.14	N/A
NLRC5	ENST00000436936.1	NLR family, CARD domain containing 5	47	1	0	0	1	1	hsa-miR-638	-0.14	-0.14	N/A
KRT78	ENST00000359499.4	keratin 78	5	1	0	0	1	0	hsa-miR-638	-0.14	-0.14	N/A
MAP3K3	ENST00000361357.3	mitogen-activated protein kinase kinase kinase 3	144	1	0	0	1	0	hsa-miR-638	-0.14	-0.14	N/A
NUDT21	ENST00000300291.5	nudix (nucleoside diphosphate linked moiety X)-type motif 21	629	1	0	1	0	1	hsa-miR-638	-0.13	-0.42	N/A
TSSK6	ENST00000360913.3	testis-specific serine kinase 6	5	1	0	1	0	0	hsa-miR-638	-0.13	-0.13	N/A
PEX5L	ENST00000467460.1	peroxisomal biogenesis factor 5-like	5	1	0	0	1	0	hsa-miR-638	-0.13	-0.13	N/A
CXCL9	ENST00000264888.5	chemokine (C-X-C motif) ligand 9	5	1	0	0	1	0	hsa-miR-638	-0.13	-0.13	N/A
TGOLN2	ENST00000377386.3	trans-golgi network protein 2	1914	1	0	0	1	0	hsa-miR-638	-0.13	-0.14	N/A
TMEM246	ENST00000374847.1	transmembrane protein 246	367	1	0	0	1	2	hsa-miR-638	-0.13	-0.26	N/A
CHST11	ENST00000549260.1	carbohydrate (chondroitin 4) sulfotransferase 11	686	1	0	0	1	0	hsa-miR-638	-0.13	-0.16	N/A
FANCC	ENST00000289081.3	Fanconi anemia, complementation group C	408	1	0	0	1	0	hsa-miR-638	-0.13	-0.14	N/A
CINP	ENST00000541568.2	cyclin-dependent kinase 2 interacting protein	2407	2	0	0	2	1	hsa-miR-638	-0.13	-0.59	N/A
FEM1A	ENST00000269856.3	fem-1 homolog a (C. elegans)	57	3	0	0	3	1	hsa-miR-638	-0.13	-0.46	N/A
TAOK1	ENST00000261716.3	TAO kinase 1	164	1	0	0	1	1	hsa-miR-638	-0.13	-0.14	N/A
CHRNA7	ENST00000306901.3	cholinergic receptor, nicotinic, alpha 7 (neuronal)	5	1	0	0	1	1	hsa-miR-638	-0.13	-0.13	N/A
WDR43	ENST00000407426.3	WD repeat domain 43	426	1	0	0	1	0	hsa-miR-638	-0.13	-0.13	N/A
PRKCB	ENST00000303531.7	protein kinase C, beta	81	1	0	0	1	0	hsa-miR-638	-0.13	-0.13	N/A
SHISA6	ENST00000441885.3	shisa family member 6	5	1	0	0	1	0	hsa-miR-638	-0.13	-0.13	N/A
CDR2L	ENST00000337231.5	cerebellar degeneration-related protein 2-like	28	1	0	0	1	1	hsa-miR-638	-0.13	-0.13	N/A
LYNX1	ENST00000395192.2	Ly6/neurotoxin 1	5	1	0	0	1	0	hsa-miR-638	-0.13	-0.13	N/A
ABCG4	ENST00000307417.3	ATP-binding cassette, sub-family G (WHITE), member 4	5	1	0	0	1	1	hsa-miR-638	-0.13	-0.13	N/A
TSPYL4	ENST00000420283.1	TSPY-like 4	5	1	0	0	1	0	hsa-miR-638	-0.13	-0.13	N/A
SIAH3	ENST00000400405.2	siah E3 ubiquitin protein ligase family member 3	5	1	0	0	1	0	hsa-miR-638	-0.13	-0.13	N/A
PIK3R5	ENST00000447110.1	phosphoinositide-3-kinase, regulatory subunit 5	5	1	0	0	1	0	hsa-miR-638	-0.13	-0.13	N/A
HTR2C	ENST00000371950.3	5-hydroxytryptamine (serotonin) receptor 2C, G protein-coupled	5	1	0	0	1	0	hsa-miR-638	-0.13	-0.13	N/A
BICD1	ENST00000548411.1	bicaudal D homolog 1 (Drosophila)	205	1	0	0	1	0	hsa-miR-638	-0.13	-0.16	N/A
NEBL	ENST00000377122.4	nebulette	181	1	0	0	1	0	hsa-miR-638	-0.13	-0.14	N/A
FAM26E	ENST00000368599.3	family with sequence similarity 26, member E	32	3	0	0	3	0	hsa-miR-638	-0.13	-0.32	N/A
DGCR2	ENST00000545799.1	DiGeorge syndrome critical region gene 2	1754	1	0	0	1	1	hsa-miR-638	-0.13	-0.14	N/A
HCAR1	ENST00000432564.1	hydroxycarboxylic acid receptor 1	38	1	0	0	1	0	hsa-miR-638	-0.13	-0.13	N/A
TRANK1	ENST00000428977.2	tetratricopeptide repeat and ankyrin repeat containing 1	140	1	0	0	1	0	hsa-miR-638	-0.13	-0.13	N/A
CRTC3	ENST00000420329.2	CREB regulated transcription coactivator 3	612	1	0	0	1	1	hsa-miR-638	-0.13	-0.13	N/A
HS3ST4	ENST00000331351.5	heparan sulfate (glucosamine) 3-O-sulfotransferase 4	5	1	0	0	1	0	hsa-miR-638	-0.13	-0.13	N/A
ZDHHC18	ENST00000374142.4	zinc finger, DHHC-type containing 18	268	2	0	1	1	0	hsa-miR-638	-0.13	-0.29	N/A
C1orf226	ENST00000458626.2	chromosome 1 open reading frame 226	369	1	0	0	1	0	hsa-miR-638	-0.13	-0.13	N/A
COL27A1	ENST00000356083.3	collagen, type XXVII, alpha 1	620	1	0	0	1	1	hsa-miR-638	-0.13	-0.13	N/A
POU5F1B	ENST00000465342.2	POU class 5 homeobox 1B	5	1	0	0	1	0	hsa-miR-638	-0.13	-0.13	N/A
C1orf180	ENST00000370624.1	chromosome 1 open reading frame 180	5	1	0	0	1	0	hsa-miR-638	-0.13	-0.13	N/A
SLC5A7	ENST00000264047.2	solute carrier family 5 (sodium/choline cotransporter), member 7	5	1	0	0	1	0	hsa-miR-638	-0.13	-0.13	N/A
HSDL1	ENST00000219439.4	hydroxysteroid dehydrogenase like 1	699	1	0	0	1	0	hsa-miR-638	-0.13	-0.15	N/A
EXOC4	ENST00000253861.4	exocyst complex component 4	325	1	0	0	1	0	hsa-miR-638	-0.13	-0.13	N/A
RPS6KA1	ENST00000374168.2	ribosomal protein S6 kinase, 90kDa, polypeptide 1	1449	1	0	0	1	1	hsa-miR-638	-0.13	-0.13	N/A
RDH12	ENST00000551171.1	retinol dehydrogenase 12 (all-trans/9-cis/11-cis)	20	1	0	0	1	0	hsa-miR-638	-0.13	-0.13	N/A
LAMC1	ENST00000258341.4	laminin, gamma 1 (formerly LAMB2)	1082	1	0	0	1	0	hsa-miR-638	-0.13	-0.29	N/A
GLDN	ENST00000335449.6	gliomedin	9	1	0	0	1	0	hsa-miR-638	-0.13	-0.13	N/A
ZBTB7A	ENST00000322357.4	zinc finger and BTB domain containing 7A	37	1	0	1	0	1	hsa-miR-638	-0.13	-0.13	N/A
ZNF74	ENST00000357502.5	zinc finger protein 74	142	2	0	0	2	0	hsa-miR-638	-0.13	-0.27	N/A
FGD6	ENST00000343958.4	FYVE, RhoGEF and PH domain containing 6	21	1	0	0	1	1	hsa-miR-638	-0.13	-0.18	N/A
PSEN1	ENST00000344094.3	presenilin 1	1340	2	0	0	2	1	hsa-miR-638	-0.13	-0.21	N/A
GALNT6	ENST00000543196.2	UDP-N-acetyl-alpha-D-galactosamine:polypeptide N-acetylgalactosaminyltransferase 6 (GalNAc-T6)	83	1	0	0	1	0	hsa-miR-638	-0.13	-0.13	N/A
NR1I2	ENST00000393716.2	nuclear receptor subfamily 1, group I, member 2	14	1	0	0	1	0	hsa-miR-638	-0.13	-0.13	N/A
NUTF2	ENST00000219169.4	nuclear transport factor 2	222	1	0	0	1	0	hsa-miR-638	-0.13	-0.23	N/A
ZNF562	ENST00000293648.4	zinc finger protein 562	130	1	0	0	1	1	hsa-miR-638	-0.13	-0.13	N/A
ILF3	ENST00000449870.1	interleukin enhancer binding factor 3, 90kDa	1758	2	0	0	2	0	hsa-miR-638	-0.13	-0.21	N/A
CACNA2D4	ENST00000382722.5	calcium channel, voltage-dependent, alpha 2/delta subunit 4	16	1	0	0	1	0	hsa-miR-638	-0.13	-0.21	N/A
NUDCD2	ENST00000302764.4	NudC domain containing 2	308	1	0	0	1	0	hsa-miR-638	-0.13	-0.22	N/A
CDH17	ENST00000027335.3	cadherin 17, LI cadherin (liver-intestine)	45	1	0	0	1	0	hsa-miR-638	-0.13	-0.13	N/A
DHTKD1	ENST00000263035.4	dehydrogenase E1 and transketolase domain containing 1	621	1	0	0	1	0	hsa-miR-638	-0.13	-0.13	N/A
B3GNT9	ENST00000449549.3	UDP-GlcNAc:betaGal beta-1,3-N-acetylglucosaminyltransferase 9	56	1	0	0	1	0	hsa-miR-638	-0.13	-0.13	N/A
PDE12	ENST00000311180.8	phosphodiesterase 12	326	1	0	0	1	0	hsa-miR-638	-0.13	-0.17	N/A
C19orf12	ENST00000592153.1	chromosome 19 open reading frame 12	242	1	0	0	1	0	hsa-miR-638	-0.12	-0.12	N/A
CD93	ENST00000246006.4	CD93 molecule	5	1	0	0	1	1	hsa-miR-638	-0.12	-0.12	N/A
TRPM6	ENST00000360774.1	transient receptor potential cation channel, subfamily M, member 6	21	1	0	0	1	0	hsa-miR-638	-0.12	-0.12	N/A
FAM199X	ENST00000493442.1	family with sequence similarity 199, X-linked	856	1	0	0	1	0	hsa-miR-638	-0.12	-0.13	N/A
TIFAB	ENST00000537858.1	TRAF-interacting protein with forkhead-associated domain, family member B	5	1	0	0	1	1	hsa-miR-638	-0.12	-0.12	N/A
FAM110C	ENST00000327669.4	family with sequence similarity 110, member C	29	1	0	0	1	0	hsa-miR-638	-0.12	-0.12	N/A
POTEG	ENST00000409832.3	POTE ankyrin domain family, member G	5	1	0	0	1	0	hsa-miR-638	-0.12	-0.12	N/A
DOCK8	ENST00000432829.2	dedicator of cytokinesis 8	11	1	0	0	1	0	hsa-miR-638	-0.12	-0.12	N/A
POTEI	ENST00000451531.2	POTE ankyrin domain family, member I	5	1	0	0	1	0	hsa-miR-638	-0.12	-0.12	N/A
POTEM	ENST00000551509.1	POTE ankyrin domain family, member M	5	1	0	0	1	0	hsa-miR-638	-0.12	-0.12	N/A
DPYSL5	ENST00000288699.6	dihydropyrimidinase-like 5	315	1	0	0	1	0	hsa-miR-638	-0.12	-0.15	N/A
TMEM184A	ENST00000297477.5	transmembrane protein 184A	28	1	0	0	1	1	hsa-miR-638	-0.12	-0.13	N/A
CCNJ	ENST00000265992.5	cyclin J	5	1	0	0	1	0	hsa-miR-638	-0.12	-0.12	N/A
KCNN3	ENST00000271915.4	potassium intermediate/small conductance calcium-activated channel, subfamily N, member 3	5	1	0	0	1	3	hsa-miR-638	-0.12	-0.12	N/A
SEMA6D	ENST00000355997.3	sema domain, transmembrane domain (TM), and cytoplasmic domain, (semaphorin) 6D	179	1	0	0	1	0	hsa-miR-638	-0.12	-0.12	N/A
KCNJ5	ENST00000529694.1	potassium inwardly-rectifying channel, subfamily J, member 5	12	1	0	0	1	0	hsa-miR-638	-0.12	-0.12	N/A
DFFA	ENST00000377038.3	DNA fragmentation factor, 45kDa, alpha polypeptide	665	1	0	0	1	0	hsa-miR-638	-0.12	-0.16	N/A
CELSR1	ENST00000262738.3	cadherin, EGF LAG seven-pass G-type receptor 1	1359	1	0	0	1	0	hsa-miR-638	-0.12	-0.12	N/A
LMX1A	ENST00000342310.3	LIM homeobox transcription factor 1, alpha	5	1	0	0	1	0	hsa-miR-638	-0.12	-0.12	N/A
PPP1R12B	ENST00000608999.1	protein phosphatase 1, regulatory subunit 12B	18	2	0	0	2	0	hsa-miR-638	-0.12	-0.12	N/A
SRRD	ENST00000215917.7	SRR1 domain containing	1069	1	1	0	0	0	hsa-miR-638	-0.12	-0.46	N/A
SRRM4	ENST00000267260.4	serine/arginine repetitive matrix 4	22	1	0	0	1	0	hsa-miR-638	-0.12	-0.12	N/A
WNT8B	ENST00000343737.5	wingless-type MMTV integration site family, member 8B	25	1	0	0	1	0	hsa-miR-638	-0.12	-0.15	N/A
PSAPL1	ENST00000319098.4	prosaposin-like 1 (gene/pseudogene)	25	1	0	0	1	1	hsa-miR-638	-0.12	-0.17	N/A
LGSN	ENST00000370658.5	lengsin, lens protein with glutamine synthetase domain	21	1	0	0	1	1	hsa-miR-638	-0.12	-0.12	N/A
NUTM2D	ENST00000381697.2	NUT family member 2D	5	1	0	1	0	0	hsa-miR-638	-0.12	-0.12	N/A
STEAP2	ENST00000287908.3	STEAP family member 2, metalloreductase	266	1	0	0	1	0	hsa-miR-638	-0.12	-0.12	N/A
UBE3B	ENST00000434735.2	ubiquitin protein ligase E3B	916	1	0	0	1	0	hsa-miR-638	-0.12	-0.13	N/A
C6orf136	ENST00000376473.5	chromosome 6 open reading frame 136	307	1	0	0	1	0	hsa-miR-638	-0.12	-0.38	N/A
SLC35F1	ENST00000360388.4	solute carrier family 35, member F1	56	1	0	0	1	0	hsa-miR-638	-0.12	-0.12	N/A
UBE2H	ENST00000355621.3	ubiquitin-conjugating enzyme E2H	855	1	0	0	1	1	hsa-miR-638	-0.12	-0.15	N/A
HTR6	ENST00000289753.1	5-hydroxytryptamine (serotonin) receptor 6, G protein-coupled	16	1	0	0	1	0	hsa-miR-638	-0.12	-0.18	N/A
POLH	ENST00000372226.1	polymerase (DNA directed), eta	450	1	0	0	1	0	hsa-miR-638	-0.12	-0.13	N/A
ZFP14	ENST00000270001.7	ZFP14 zinc finger protein	109	1	0	0	1	0	hsa-miR-638	-0.12	-0.12	N/A
FGD4	ENST00000427716.2	FYVE, RhoGEF and PH domain containing 4	38	1	0	0	1	0	hsa-miR-638	-0.12	-0.16	N/A
PTGFRN	ENST00000393203.2	prostaglandin F2 receptor inhibitor	591	1	0	0	1	1	hsa-miR-638	-0.12	-0.14	N/A
BTBD7	ENST00000334746.5	BTB (POZ) domain containing 7	590	1	0	0	1	0	hsa-miR-638	-0.12	-0.14	N/A
SORCS1	ENST00000369698.1	sortilin-related VPS10 domain containing receptor 1	88	1	0	0	1	2	hsa-miR-638	-0.12	-0.17	N/A
PAPPA2	ENST00000367662.3	pappalysin 2	5	1	0	0	1	0	hsa-miR-638	-0.12	-0.12	N/A
KRT74	ENST00000549343.1	keratin 74	5	1	0	0	1	0	hsa-miR-638	-0.12	-0.12	N/A
NAPG	ENST00000322897.6	N-ethylmaleimide-sensitive factor attachment protein, gamma	277	1	0	0	1	0	hsa-miR-638	-0.12	-0.22	N/A
CRTC1	ENST00000338797.6	CREB regulated transcription coactivator 1	322	1	0	0	1	1	hsa-miR-638	-0.12	-0.12	N/A
NPY4R	ENST00000374312.1	neuropeptide Y receptor Y4	10	2	0	0	2	1	hsa-miR-638	-0.12	-0.23	N/A
F2RL3	ENST00000248076.3	coagulation factor II (thrombin) receptor-like 3	5	1	0	0	1	0	hsa-miR-638	-0.12	-0.12	N/A
SYNGR1	ENST00000328933.5	synaptogyrin 1	101	2	0	1	1	0	hsa-miR-638	-0.12	-0.12	N/A
PLEKHM1	ENST00000430334.3	pleckstrin homology domain containing, family M (with RUN domain) member 1	90	1	0	1	0	0	hsa-miR-638	-0.12	-0.12	N/A
ZNF561	ENST00000326044.5	zinc finger protein 561	156	1	0	0	1	0	hsa-miR-638	-0.12	-0.12	N/A
NUTM2A	ENST00000381707.2	NUT family member 2A	5	1	0	1	0	0	hsa-miR-638	-0.12	-0.12	N/A
CD47	ENST00000361309.5	CD47 molecule	520	2	0	0	2	0	hsa-miR-638	-0.12	-0.33	N/A
JAM3	ENST00000299106.4	junctional adhesion molecule 3	85	1	0	0	1	0	hsa-miR-638	-0.12	-0.12	N/A
NRIP3	ENST00000309166.3	nuclear receptor interacting protein 3	58	1	0	0	1	1	hsa-miR-638	-0.12	-0.13	N/A
CBX7	ENST00000216133.5	chromobox homolog 7	5	1	0	0	1	1	hsa-miR-638	-0.12	-0.12	N/A
C10orf105	ENST00000441508.2	chromosome 10 open reading frame 105	5	1	0	0	1	0	hsa-miR-638	-0.12	-0.12	N/A
RP11-156E8.1	ENST00000607453.1		51	1	0	0	1	0	hsa-miR-638	-0.11	-0.14	N/A
MGLL	ENST00000434178.2	monoglyceride lipase	453	1	0	0	1	1	hsa-miR-638	-0.11	-0.21	N/A
PNPLA5	ENST00000597664.1	patatin-like phospholipase domain containing 5	5	1	0	0	1	0	hsa-miR-638	-0.11	-0.11	N/A
BDP1	ENST00000380675.2	B double prime 1, subunit of RNA polymerase III transcription initiation factor IIIB	12	1	0	0	1	0	hsa-miR-638	-0.11	-0.2	N/A
STK35	ENST00000381482.3	serine/threonine kinase 35	263	1	0	0	1	1	hsa-miR-638	-0.11	-0.12	N/A
RAB21	ENST00000261263.3	RAB21, member RAS oncogene family	1823	1	0	0	1	1	hsa-miR-638	-0.11	-0.24	N/A
ZNF850	ENST00000591344.1	zinc finger protein 850	136	1	0	1	0	1	hsa-miR-638	-0.11	-0.12	N/A
EMILIN1	ENST00000380320.4	elastin microfibril interfacer 1	5	1	0	1	0	0	hsa-miR-638	-0.11	-0.11	N/A
LRRC32	ENST00000260061.5	leucine rich repeat containing 32	10	1	0	0	1	0	hsa-miR-638	-0.11	-0.11	N/A
MUC17	ENST00000306151.4	mucin 17, cell surface associated	5	1	0	0	1	0	hsa-miR-638	-0.11	-0.11	N/A
PANK1	ENST00000322191.6	pantothenate kinase 1	435	1	0	0	1	1	hsa-miR-638	-0.11	-0.15	N/A
DDX21	ENST00000354185.4	DEAD (Asp-Glu-Ala-Asp) box helicase 21	202	1	0	0	1	0	hsa-miR-638	-0.11	-0.13	N/A
PGAP1	ENST00000354764.4	post-GPI attachment to proteins 1	106	1	0	0	1	0	hsa-miR-638	-0.11	-0.12	N/A
CDON	ENST00000392693.3	cell adhesion associated, oncogene regulated	173	1	0	0	1	1	hsa-miR-638	-0.11	-0.15	N/A
ACSBG1	ENST00000258873.4	acyl-CoA synthetase bubblegum family member 1	5	1	1	0	0	0	hsa-miR-638	-0.11	-0.11	N/A
UVRAG	ENST00000356136.3	UV radiation resistance associated	116	1	0	0	1	0	hsa-miR-638	-0.11	-0.11	N/A
KSR1	ENST00000398988.3	kinase suppressor of ras 1	256	1	0	0	1	0	hsa-miR-638	-0.11	-0.11	N/A
ADAL	ENST00000428046.3	adenosine deaminase-like	105	2	0	0	2	0	hsa-miR-638	-0.11	-0.29	N/A
RP11-111M22.2	ENST00000530460.1	Homo sapiens putative uncharacterized protein FLJ37770-like (LOC100506127), mRNA.	18	1	0	0	1	0	hsa-miR-638	-0.11	-0.16	N/A
FRG1B	ENST00000278882.3	FSHD region gene 1 family, member B	94	1	0	0	1	0	hsa-miR-638	-0.11	-0.2	N/A
IL16	ENST00000394660.2	interleukin 16	5	1	1	0	0	1	hsa-miR-638	-0.11	-0.11	N/A
KIAA0930	ENST00000336156.5	KIAA0930	1107	2	0	1	1	0	hsa-miR-638	-0.11	-0.21	N/A
ADAMTSL1	ENST00000380548.4	ADAMTS-like 1	38	1	0	0	1	0	hsa-miR-638	-0.11	-0.11	N/A
GLCE	ENST00000559420.2	glucuronic acid epimerase	25	2	0	0	2	0	hsa-miR-638	-0.11	-0.27	N/A
LMOD2	ENST00000458573.2	leiomodin 2 (cardiac)	5	1	0	0	1	1	hsa-miR-638	-0.11	-0.28	N/A
ZNF785	ENST00000470110.1	zinc finger protein 785	40	1	0	0	1	0	hsa-miR-638	-0.11	-0.11	N/A
ARNT2	ENST00000303329.4	aryl-hydrocarbon receptor nuclear translocator 2	39	1	0	0	1	1	hsa-miR-638	-0.11	-0.11	N/A
GLG1	ENST00000422840.2	golgi glycoprotein 1	2175	1	0	0	1	0	hsa-miR-638	-0.11	-0.11	N/A
BTNL9	ENST00000327705.9	butyrophilin-like 9	8	1	0	0	1	0	hsa-miR-638	-0.11	-0.11	N/A
SH3PXD2B	ENST00000311601.5	SH3 and PX domains 2B	123	1	0	0	1	2	hsa-miR-638	-0.11	-0.12	N/A
ST3GAL1	ENST00000319914.5	ST3 beta-galactoside alpha-2,3-sialyltransferase 1	59	1	1	0	0	0	hsa-miR-638	-0.11	-0.31	N/A
PTS	ENST00000525803.1	6-pyruvoyltetrahydropterin synthase	1526	1	0	0	1	1	hsa-miR-638	-0.11	-0.48	N/A
TMEM8A	ENST00000431232.2	transmembrane protein 8A	2174	1	0	0	1	2	hsa-miR-638	-0.11	-0.23	N/A
ZNF791	ENST00000446165.1	zinc finger protein 791	242	1	0	0	1	0	hsa-miR-638	-0.11	-0.11	N/A
ZFP1	ENST00000464850.1	ZFP1 zinc finger protein	32	1	0	0	1	0	hsa-miR-638	-0.11	-0.21	N/A
ADAMTS2	ENST00000251582.7	ADAM metallopeptidase with thrombospondin type 1 motif, 2	2767	1	0	1	0	0	hsa-miR-638	-0.11	-0.11	N/A
KLHL25	ENST00000337975.5	kelch-like family member 25	98	1	0	0	1	0	hsa-miR-638	-0.11	-0.11	N/A
NF2	ENST00000347330.5	neurofibromin 2 (merlin)	828	1	0	0	1	0	hsa-miR-638	-0.11	-0.13	N/A
SPAG9	ENST00000262013.7	sperm associated antigen 9	509	1	0	0	1	0	hsa-miR-638	-0.11	-0.18	N/A
UBR2	ENST00000372883.3	ubiquitin protein ligase E3 component n-recognin 2	728	1	0	0	1	1	hsa-miR-638	-0.11	-0.15	N/A
REL	ENST00000295025.8	v-rel avian reticuloendotheliosis viral oncogene homolog	116	1	0	0	1	3	hsa-miR-638	-0.11	-0.11	N/A
KNOP1	ENST00000219837.7	lysine-rich nucleolar protein 1	157	1	0	0	1	2	hsa-miR-638	-0.11	-0.18	N/A
MED14	ENST00000324817.1	mediator complex subunit 14	1038	1	0	0	1	0	hsa-miR-638	-0.11	-0.13	N/A
C6orf222	ENST00000437635.2	chromosome 6 open reading frame 222	5	1	0	0	1	0	hsa-miR-638	-0.11	-0.11	N/A
CYFIP2	ENST00000318218.6	cytoplasmic FMR1 interacting protein 2	303	1	0	0	1	0	hsa-miR-638	-0.11	-0.11	N/A
PLEKHO2	ENST00000323544.4	pleckstrin homology domain containing, family O member 2	279	1	0	0	1	1	hsa-miR-638	-0.1	-0.1	N/A
TAF8	ENST00000372977.3	TAF8 RNA polymerase II, TATA box binding protein (TBP)-associated factor, 43kDa	135	1	1	0	0	1	hsa-miR-638	-0.1	-0.14	N/A
SORD	ENST00000267814.9	sorbitol dehydrogenase	5	1	0	0	1	0	hsa-miR-638	-0.1	-0.1	N/A
PCDH18	ENST00000412923.2	protocadherin 18	112	1	0	0	1	0	hsa-miR-638	-0.1	-0.24	N/A
RAP1GAP2	ENST00000254695.8	RAP1 GTPase activating protein 2	123	1	0	0	1	0	hsa-miR-638	-0.1	-0.16	N/A
ABHD17A	ENST00000590661.1	abhydrolase domain containing 17A	202	1	0	0	1	0	hsa-miR-638	-0.1	-0.11	N/A
ADAM28	ENST00000265769.4	ADAM metallopeptidase domain 28	5	1	0	0	1	0	hsa-miR-638	-0.1	-0.1	N/A
WDR70	ENST00000265107.4	WD repeat domain 70	23	1	0	0	1	0	hsa-miR-638	-0.1	-0.18	N/A
NR2C2	ENST00000425241.1	nuclear receptor subfamily 2, group C, member 2	227	1	0	0	1	1	hsa-miR-638	-0.1	-0.16	N/A
HSPA6	ENST00000309758.4	heat shock 70kDa protein 6 (HSP70B')	27	1	0	0	1	0	hsa-miR-638	-0.1	-0.13	N/A
CCDC88C	ENST00000389857.6	coiled-coil domain containing 88C	42	1	0	0	1	0	hsa-miR-638	-0.1	-0.11	N/A
TSC1	ENST00000298552.3	tuberous sclerosis 1	838	1	0	0	1	1	hsa-miR-638	-0.1	-0.11	N/A
DCX	ENST00000356915.2	doublecortin	5	1	0	0	1	1	hsa-miR-638	-0.1	-0.1	N/A
PFKFB4	ENST00000232375.3	6-phosphofructo-2-kinase/fructose-2,6-biphosphatase 4	16	1	0	0	1	0	hsa-miR-638	-0.1	-0.1	N/A
OLIG1	ENST00000382348.1	oligodendrocyte transcription factor 1	34	1	0	0	1	0	hsa-miR-638	-0.1	-0.1	N/A
PLXNA1	ENST00000393409.2	plexin A1	189	2	0	1	1	0	hsa-miR-638	-0.1	-0.2	N/A
KLHL8	ENST00000273963.5	kelch-like family member 8	266	1	0	0	1	0	hsa-miR-638	-0.1	-0.1	N/A
EIF4E3	ENST00000425534.3	eukaryotic translation initiation factor 4E family member 3	475	1	0	0	1	1	hsa-miR-638	-0.1	-0.18	N/A
COMMD2	ENST00000473414.1	COMM domain containing 2	833	1	0	0	1	0	hsa-miR-638	-0.1	-0.14	N/A
DAZAP1	ENST00000336761.6	DAZ associated protein 1	3500	1	0	0	1	0	hsa-miR-638	-0.1	-0.15	N/A
ZDHHC5	ENST00000287169.3	zinc finger, DHHC-type containing 5	1505	1	0	0	1	1	hsa-miR-638	-0.1	-0.23	N/A
EIF4EBP2	ENST00000373218.4	eukaryotic translation initiation factor 4E binding protein 2	690	1	0	0	1	0	hsa-miR-638	-0.1	-0.14	N/A
MTX3	ENST00000509852.1	metaxin 3	304	1	0	0	1	0	hsa-miR-638	-0.1	-0.1	N/A
ZEB2	ENST00000558170.2	zinc finger E-box binding homeobox 2	33	1	0	0	1	0	hsa-miR-638	-0.1	-0.12	N/A
XKR4	ENST00000327381.6	XK, Kell blood group complex subunit-related family, member 4	5	2	0	0	2	1	hsa-miR-638	-0.1	-0.1	N/A
LCMT2	ENST00000567039.1	leucine carboxyl methyltransferase 2	274	1	0	0	1	0	hsa-miR-638	-0.1	-0.1	N/A
ARHGEF11	ENST00000368194.3	Rho guanine nucleotide exchange factor (GEF) 11	346	1	0	0	1	0	hsa-miR-638	-0.1	-0.1	N/A
ETV6	ENST00000396373.4	ets variant 6	44	1	0	0	1	1	hsa-miR-638	-0.1	-0.12	N/A
WNT9B	ENST00000290015.2	wingless-type MMTV integration site family, member 9B	28	1	0	0	1	0	hsa-miR-638	-0.1	-0.12	N/A
TRAK2	ENST00000332624.3	trafficking protein, kinesin binding 2	353	1	0	0	1	0	hsa-miR-638	-0.1	-0.18	N/A
SLIT3	ENST00000519560.1	slit homolog 3 (Drosophila)	13	1	0	0	1	0	hsa-miR-638	-0.1	-0.12	N/A
PRKCI	ENST00000295797.4	protein kinase C, iota	103	1	0	0	1	0	hsa-miR-638	-0.1	-0.1	N/A
ZNF132	ENST00000254166.3	zinc finger protein 132	31	1	0	0	1	1	hsa-miR-638	-0.1	-0.15	N/A
MMS22L	ENST00000275053.4	MMS22-like, DNA repair protein	102	1	0	0	1	0	hsa-miR-638	-0.1	-0.17	N/A
LZTR1	ENST00000215739.8	leucine-zipper-like transcription regulator 1	356	1	0	0	1	0	hsa-miR-638	-0.1	-0.1	N/A
IL22RA2	ENST00000339602.3	interleukin 22 receptor, alpha 2	5	1	0	0	1	0	hsa-miR-638	-0.1	-0.1	N/A
GATA2	ENST00000341105.2	GATA binding protein 2	231	1	0	0	1	0	hsa-miR-638	-0.1	-0.1	N/A
AKNA	ENST00000307564.4	AT-hook transcription factor	10	1	0	0	1	0	hsa-miR-638	-0.1	-0.1	N/A
CATSPER2	ENST00000396879.1	cation channel, sperm associated 2	5	1	0	0	1	0	hsa-miR-638	-0.1	-0.1	N/A
CDK12	ENST00000447079.4	cyclin-dependent kinase 12	748	1	0	0	1	0	hsa-miR-638	-0.1	-0.12	N/A
ACVRL1	ENST00000550683.1	activin A receptor type II-like 1	68	1	0	0	1	1	hsa-miR-638	-0.1	-0.16	N/A
STRN	ENST00000263918.4	striatin, calmodulin binding protein	476	1	0	0	1	2	hsa-miR-638	-0.1	-0.16	N/A
TMEM150C	ENST00000515780.2	transmembrane protein 150C	8	1	0	0	1	0	hsa-miR-638	-0.1	-0.1	N/A
PDE7B	ENST00000308191.6	phosphodiesterase 7B	148	1	0	0	1	0	hsa-miR-638	-0.1	-0.1	N/A
C2orf49	ENST00000258457.2	chromosome 2 open reading frame 49	161	1	0	0	1	0	hsa-miR-638	-0.1	-0.17	N/A
PRDM6	ENST00000407847.4	PR domain containing 6	69	1	0	0	1	0	hsa-miR-638	-0.1	-0.12	N/A
PAPOLG	ENST00000238714.3	poly(A) polymerase gamma	49	1	0	0	1	0	hsa-miR-638	-0.1	-0.14	N/A
LIFR	ENST00000263409.4	leukemia inhibitory factor receptor alpha	44	2	0	0	2	1	hsa-miR-638	-0.1	-0.24	N/A
ONECUT2	ENST00000491143.2	one cut homeobox 2	847	1	0	0	1	1	hsa-miR-638	-0.1	-0.1	N/A
EXOC7	ENST00000607838.1	exocyst complex component 7	1483	1	0	0	1	0	hsa-miR-638	-0.1	-0.17	N/A
NKD1	ENST00000268459.3	naked cuticle homolog 1 (Drosophila)	26	2	0	1	1	1	hsa-miR-638	-0.1	-0.25	N/A
KLF11	ENST00000305883.1	Kruppel-like factor 11	42	1	0	0	1	0	hsa-miR-638	-0.1	-0.11	N/A
AK7	ENST00000267584.4	adenylate kinase 7	30	1	0	0	1	0	hsa-miR-638	-0.1	-0.1	N/A
SLC35E3	ENST00000398004.2	solute carrier family 35, member E3	250	1	0	0	1	0	hsa-miR-638	-0.09	-0.2	N/A
ZNF708	ENST00000356929.3	zinc finger protein 708	16	1	0	0	1	0	hsa-miR-638	-0.09	-0.18	N/A
DNAJC11	ENST00000377577.5	DnaJ (Hsp40) homolog, subfamily C, member 11	361	1	1	0	0	0	hsa-miR-638	-0.09	-0.18	N/A
ZNF26	ENST00000328654.5	zinc finger protein 26	51	1	0	1	0	0	hsa-miR-638	-0.09	-0.33	N/A
VASH1	ENST00000167106.4	vasohibin 1	39	1	0	0	1	0	hsa-miR-638	-0.09	-0.09	N/A
C21orf90	ENST00000354333.5	chromosome 21 open reading frame 90	26	1	0	0	1	0	hsa-miR-638	-0.09	-0.18	N/A
C1orf95	ENST00000366788.3	chromosome 1 open reading frame 95	28	1	0	0	1	2	hsa-miR-638	-0.09	-0.28	N/A
ZCWPW2	ENST00000383768.2	zinc finger, CW type with PWWP domain 2	10	1	0	0	1	0	hsa-miR-638	-0.09	-0.19	N/A
SP7	ENST00000536324.2	Sp7 transcription factor	5	1	0	0	1	1	hsa-miR-638	-0.09	-0.09	N/A
CAB39L	ENST00000355854.4	calcium binding protein 39-like	12	1	0	0	1	1	hsa-miR-638	-0.09	-0.23	N/A
RBM19	ENST00000545145.2	RNA binding motif protein 19	217	1	0	0	1	0	hsa-miR-638	-0.09	-0.09	N/A
COL13A1	ENST00000398974.3	collagen, type XIII, alpha 1	628	1	0	0	1	0	hsa-miR-638	-0.09	-0.15	N/A
PEAK1	ENST00000312493.4	pseudopodium-enriched atypical kinase 1	209	1	0	0	1	0	hsa-miR-638	-0.09	-0.09	N/A
PSMD12	ENST00000356126.3	proteasome (prosome, macropain) 26S subunit, non-ATPase, 12	399	2	0	0	2	0	hsa-miR-638	-0.09	-0.28	N/A
IRAK3	ENST00000261233.4	interleukin-1 receptor-associated kinase 3	13	1	0	0	1	1	hsa-miR-638	-0.09	-0.11	N/A
DLGAP2	ENST00000421627.2	discs, large (Drosophila) homolog-associated protein 2	5	1	0	0	1	1	hsa-miR-638	-0.09	-0.09	N/A
GXYLT1	ENST00000398675.3	glucoside xylosyltransferase 1	126	1	0	0	1	0	hsa-miR-638	-0.09	-0.09	N/A
PPP1R16B	ENST00000299824.1	protein phosphatase 1, regulatory subunit 16B	16	1	0	0	1	1	hsa-miR-638	-0.09	-0.09	N/A
DRAXIN	ENST00000294485.5	dorsal inhibitory axon guidance protein	5	1	0	0	1	2	hsa-miR-638	-0.09	-0.09	N/A
RIMKLB	ENST00000357529.3	ribosomal modification protein rimK-like family member B	164	1	0	1	0	0	hsa-miR-638	-0.09	-0.18	N/A
NCAN	ENST00000252575.6	neurocan	5	1	0	0	1	0	hsa-miR-638	-0.09	-0.09	N/A
CELF2	ENST00000379261.4	CUGBP, Elav-like family member 2	45	1	0	0	1	0	hsa-miR-638	-0.09	-0.09	N/A
ZNF512B	ENST00000369888.1	zinc finger protein 512B	8	1	0	1	0	0	hsa-miR-638	-0.09	-0.09	N/A
C2orf43	ENST00000440866.2	chromosome 2 open reading frame 43	398	1	0	0	1	0	hsa-miR-638	-0.09	-0.1	N/A
PDE4DIP	ENST00000369345.4	phosphodiesterase 4D interacting protein	36	1	0	0	1	0	hsa-miR-638	-0.09	-0.25	N/A
AKAP2	ENST00000374525.1	A kinase (PRKA) anchor protein 2	1287	1	0	0	1	1	hsa-miR-638	-0.09	-0.09	N/A
HIST1H2AH	ENST00000377459.1	histone cluster 1, H2ah	22	1	0	0	1	0	hsa-miR-638	-0.09	-0.21	N/A
LONRF2	ENST00000393437.3	LON peptidase N-terminal domain and ring finger 2	394	1	0	0	1	1	hsa-miR-638	-0.09	-0.09	N/A
PAX5	ENST00000358127.4	paired box 5	5	2	0	0	2	0	hsa-miR-638	-0.09	-0.09	N/A
LRRC3C	ENST00000377924.4	leucine rich repeat containing 3C	9	1	0	0	1	1	hsa-miR-638	-0.09	-0.2	N/A
BAP1	ENST00000460680.1	BRCA1 associated protein-1 (ubiquitin carboxy-terminal hydrolase)	445	1	0	0	1	0	hsa-miR-638	-0.08	-0.09	N/A
C20orf112	ENST00000359676.5	chromosome 20 open reading frame 112	148	1	0	0	1	0	hsa-miR-638	-0.08	-0.13	N/A
C1QTNF2	ENST00000393975.3	C1q and tumor necrosis factor related protein 2	9	1	0	0	1	0	hsa-miR-638	-0.08	-0.16	N/A
ZBTB40	ENST00000404138.1	zinc finger and BTB domain containing 40	124	1	0	0	1	0	hsa-miR-638	-0.08	-0.1	N/A
EIF5A2	ENST00000474096.1	eukaryotic translation initiation factor 5A2	443	1	0	0	1	0	hsa-miR-638	-0.08	-0.22	N/A
PNMAL2	ENST00000599531.1	paraneoplastic Ma antigen family-like 2	10	1	0	1	0	2	hsa-miR-638	-0.08	-0.1	N/A
BRIP1	ENST00000259008.2	BRCA1 interacting protein C-terminal helicase 1	21	1	0	0	1	0	hsa-miR-638	-0.08	-0.18	N/A
FBN1	ENST00000316623.5	fibrillin 1	798	1	0	1	0	0	hsa-miR-638	-0.08	-0.22	N/A
SLC12A6	ENST00000397707.2	solute carrier family 12 (potassium/chloride transporter), member 6	17	2	0	0	2	1	hsa-miR-638	-0.08	-0.16	N/A
FZD7	ENST00000286201.1	frizzled family receptor 7	319	1	0	1	0	0	hsa-miR-638	-0.08	-0.08	N/A
EIF3M	ENST00000531120.1	eukaryotic translation initiation factor 3, subunit M	218	1	0	0	1	0	hsa-miR-638	-0.08	-0.24	N/A
ZNF670	ENST00000366503.2	zinc finger protein 670	117	1	0	1	0	2	hsa-miR-638	-0.08	-0.48	N/A
DCTN5	ENST00000300087.2	dynactin 5 (p25)	764	1	0	0	1	2	hsa-miR-638	-0.08	-0.11	N/A
P4HA2	ENST00000401867.1	prolyl 4-hydroxylase, alpha polypeptide II	1077	1	0	0	1	1	hsa-miR-638	-0.08	-0.27	N/A
ONECUT3	ENST00000382349.4	one cut homeobox 3	5	1	0	0	1	1	hsa-miR-638	-0.08	-0.08	N/A
DHX33	ENST00000225296.3	DEAH (Asp-Glu-Ala-His) box polypeptide 33	724	1	0	1	0	0	hsa-miR-638	-0.08	-0.08	N/A
WDR59	ENST00000262144.6	WD repeat domain 59	24	1	0	0	1	1	hsa-miR-638	-0.08	-0.19	N/A
TRAF3	ENST00000560371.1	TNF receptor-associated factor 3	833	1	0	0	1	0	hsa-miR-638	-0.08	-0.11	N/A
HEATR3	ENST00000299192.7	HEAT repeat containing 3	119	1	0	0	1	0	hsa-miR-638	-0.08	-0.17	N/A
LYRM7	ENST00000507584.1	LYR motif containing 7	217	1	0	0	1	0	hsa-miR-638	-0.08	-0.2	N/A
MCC	ENST00000302475.4	mutated in colorectal cancers	115	1	0	0	1	0	hsa-miR-638	-0.08	-0.08	N/A
PDE4C	ENST00000355502.3	phosphodiesterase 4C, cAMP-specific	5	1	0	1	0	0	hsa-miR-638	-0.08	-0.08	N/A
SNX22	ENST00000325881.4	sorting nexin 22	5	1	0	0	1	0	hsa-miR-638	-0.08	-0.08	N/A
FER	ENST00000281092.4	fer (fps/fes related) tyrosine kinase	665	1	0	0	1	0	hsa-miR-638	-0.08	-0.08	N/A
NPTX1	ENST00000306773.4	neuronal pentraxin I	1876	1	0	0	1	0	hsa-miR-638	-0.08	-0.08	N/A
ABL2	ENST00000502732.1	c-abl oncogene 2, non-receptor tyrosine kinase	892	1	0	0	1	2	hsa-miR-638	-0.08	-0.08	N/A
PALM2-AKAP2	ENST00000374530.3	PALM2-AKAP2 readthrough	1287	1	0	0	1	1	hsa-miR-638	-0.08	-0.08	N/A
GPN2	ENST00000374135.4	GPN-loop GTPase 2	97	1	0	0	1	0	hsa-miR-638	-0.08	-0.1	N/A
CLIP3	ENST00000360535.4	CAP-GLY domain containing linker protein 3	9	1	0	0	1	0	hsa-miR-638	-0.08	-0.14	N/A
MAGI1	ENST00000330909.8	membrane associated guanylate kinase, WW and PDZ domain containing 1	258	1	0	0	1	1	hsa-miR-638	-0.08	-0.19	N/A
ACHE	ENST00000302913.4	acetylcholinesterase	14	1	0	1	0	0	hsa-miR-638	-0.08	-0.24	N/A
TMEM98	ENST00000579849.1	transmembrane protein 98	98	1	0	0	1	2	hsa-miR-638	-0.08	-0.26	N/A
XKR7	ENST00000562532.2	XK, Kell blood group complex subunit-related family, member 7	5	1	0	0	1	1	hsa-miR-638	-0.08	-0.08	N/A
TNFRSF8	ENST00000263932.2	tumor necrosis factor receptor superfamily, member 8	5	1	0	0	1	0	hsa-miR-638	-0.08	-0.08	N/A
ARHGAP26	ENST00000378004.3	Rho GTPase activating protein 26	131	1	0	0	1	2	hsa-miR-638	-0.08	-0.14	N/A
SRSF1	ENST00000258962.4	serine/arginine-rich splicing factor 1	1430	1	0	0	1	0	hsa-miR-638	-0.08	-0.1	N/A
CD2BP2	ENST00000305596.3	CD2 (cytoplasmic tail) binding protein 2	222	1	0	0	1	2	hsa-miR-638	-0.08	-0.18	N/A
NRG4	ENST00000394907.3	neuregulin 4	73	1	0	0	1	0	hsa-miR-638	-0.08	-0.24	N/A
SRGAP1	ENST00000355086.3	SLIT-ROBO Rho GTPase activating protein 1	64	1	1	0	0	0	hsa-miR-638	-0.08	-0.1	N/A
MBOAT2	ENST00000305997.3	membrane bound O-acyltransferase domain containing 2	1145	1	1	0	0	0	hsa-miR-638	-0.08	-0.23	N/A
NDUFA7	ENST00000301457.2	NADH dehydrogenase (ubiquinone) 1 alpha subcomplex, 7, 14.5kDa	550	1	0	0	1	1	hsa-miR-638	-0.08	-0.31	N/A
BRI3BP	ENST00000341446.8	BRI3 binding protein	820	1	0	0	1	0	hsa-miR-638	-0.08	-0.09	N/A
STX6	ENST00000258301.5	syntaxin 6	348	1	0	0	1	0	hsa-miR-638	-0.08	-0.16	N/A
SP110	ENST00000258381.6	SP110 nuclear body protein	19	1	0	0	1	0	hsa-miR-638	-0.08	-0.11	N/A
VPS36	ENST00000378060.4	vacuolar protein sorting 36 homolog (S. cerevisiae)	57	1	0	0	1	0	hsa-miR-638	-0.08	-0.08	N/A
SGCD	ENST00000435422.3	sarcoglycan, delta (35kDa dystrophin-associated glycoprotein)	39	1	0	0	1	1	hsa-miR-638	-0.08	-0.1	N/A
TFEC	ENST00000265440.7	transcription factor EC	5	1	0	0	1	0	hsa-miR-638	-0.08	-0.08	N/A
DMBX1	ENST00000360032.3	diencephalon/mesencephalon homeobox 1	31	1	0	0	1	0	hsa-miR-638	-0.08	-0.09	N/A
HOOK3	ENST00000307602.4	hook microtubule-tethering protein 3	403	1	0	0	1	0	hsa-miR-638	-0.08	-0.08	N/A
YY1	ENST00000262238.4	YY1 transcription factor	1803	1	0	0	1	1	hsa-miR-638	-0.08	-0.12	N/A
SCN2A	ENST00000375437.2	sodium channel, voltage-gated, type II, alpha subunit	7	1	0	0	1	0	hsa-miR-638	-0.08	-0.08	N/A
KLF13	ENST00000307145.3	Kruppel-like factor 13	5	1	1	0	0	0	hsa-miR-638	-0.08	-0.08	N/A
VN1R1	ENST00000321039.3	vomeronasal 1 receptor 1	12	1	0	0	1	0	hsa-miR-638	-0.08	-0.13	N/A
OPA3	ENST00000263275.4	optic atrophy 3 (autosomal recessive, with chorea and spastic paraplegia)	137	1	0	0	1	0	hsa-miR-638	-0.08	-0.09	N/A
CHD5	ENST00000262450.3	chromodomain helicase DNA binding protein 5	5	1	0	0	1	0	hsa-miR-638	-0.08	-0.08	N/A
MAN1A2	ENST00000356554.3	mannosidase, alpha, class 1A, member 2	603	1	0	0	1	0	hsa-miR-638	-0.07	-0.14	N/A
PARM1	ENST00000513238.1	prostate androgen-regulated mucin-like protein 1	161	1	0	0	1	0	hsa-miR-638	-0.07	-0.08	N/A
CHST14	ENST00000306243.5	carbohydrate (N-acetylgalactosamine 4-0) sulfotransferase 14	1143	1	0	0	1	1	hsa-miR-638	-0.07	-0.18	N/A
CCDC85C	ENST00000380243.4	coiled-coil domain containing 85C	86	1	0	0	1	0	hsa-miR-638	-0.07	-0.09	N/A
ANKRD26	ENST00000376070.3	ankyrin repeat domain 26	95	1	0	0	1	0	hsa-miR-638	-0.07	-0.14	N/A
TRABD2B	ENST00000606738.2	TraB domain containing 2B	244	1	0	0	1	2	hsa-miR-638	-0.07	-0.1	N/A
METTL21A	ENST00000448823.2	methyltransferase like 21A	224	1	0	0	1	1	hsa-miR-638	-0.07	-0.21	N/A
RAD9B	ENST00000409425.1	RAD9 homolog B (S. pombe)	10	1	0	0	1	0	hsa-miR-638	-0.07	-0.15	N/A
KLF8	ENST00000468660.1	Kruppel-like factor 8	8	1	0	0	1	2	hsa-miR-638	-0.07	-0.2	N/A
CDKN2B	ENST00000380142.4	cyclin-dependent kinase inhibitor 2B (p15, inhibits CDK4)	373	1	0	0	1	0	hsa-miR-638	-0.07	-0.12	N/A
AP3D1	ENST00000355272.6	adaptor-related protein complex 3, delta 1 subunit	464	1	0	0	1	0	hsa-miR-638	-0.07	-0.09	N/A
ARSD	ENST00000381154.1	arylsulfatase D	70	1	0	0	1	0	hsa-miR-638	-0.07	-0.14	N/A
LCN10	ENST00000497771.1	lipocalin 10	10	1	0	0	1	0	hsa-miR-638	-0.07	-0.16	N/A
DCAF7	ENST00000310827.4	DDB1 and CUL4 associated factor 7	3289	1	0	0	1	0	hsa-miR-638	-0.07	-0.07	N/A
SLC36A4	ENST00000326402.4	solute carrier family 36 (proton/amino acid symporter), member 4	252	1	0	0	1	1	hsa-miR-638	-0.07	-0.12	N/A
KIAA1147	ENST00000536163.1	KIAA1147	73	1	0	0	1	0	hsa-miR-638	-0.07	-0.11	N/A
MACC1	ENST00000400331.5	metastasis associated in colon cancer 1	5	1	0	0	1	0	hsa-miR-638	-0.07	-0.07	N/A
RAD54L2	ENST00000409535.2	RAD54-like 2 (S. cerevisiae)	215	2	0	0	2	1	hsa-miR-638	-0.07	-0.07	N/A
ATXN1	ENST00000244769.4	ataxin 1	106	1	0	0	1	0	hsa-miR-638	-0.07	-0.1	N/A
SUV39H2	ENST00000313519.5	suppressor of variegation 3-9 homolog 2 (Drosophila)	54	1	0	0	1	0	hsa-miR-638	-0.07	-0.13	N/A
RNF20	ENST00000389120.3	ring finger protein 20, E3 ubiquitin protein ligase	772	1	0	0	1	2	hsa-miR-638	-0.07	-0.19	N/A
PHACTR2	ENST00000427704.2	phosphatase and actin regulator 2	274	1	0	0	1	0	hsa-miR-638	-0.07	-0.08	N/A
MMAB	ENST00000545712.2	methylmalonic aciduria (cobalamin deficiency) cblB type	2107	1	0	1	0	2	hsa-miR-638	-0.07	-0.37	N/A
POU2F1	ENST00000367866.2	POU class 2 homeobox 1	83	1	0	0	1	1	hsa-miR-638	-0.07	-0.07	N/A
NFIC	ENST00000346156.5	nuclear factor I/C (CCAAT-binding transcription factor)	26	1	0	0	1	0	hsa-miR-638	-0.07	-0.09	N/A
SFT2D3	ENST00000310981.4	SFT2 domain containing 3	313	2	0	0	2	0	hsa-miR-638	-0.07	-0.35	N/A
PPARA	ENST00000396000.2	peroxisome proliferator-activated receptor alpha	82	1	0	0	1	1	hsa-miR-638	-0.07	-0.1	N/A
SMC3	ENST00000361804.4	structural maintenance of chromosomes 3	15	1	0	0	1	0	hsa-miR-638	-0.07	-0.12	N/A
FBXO41	ENST00000295133.5	F-box protein 41	175	1	0	0	1	1	hsa-miR-638	-0.07	-0.07	N/A
NPC1L1	ENST00000289547.4	NPC1-like 1	55	1	0	0	1	0	hsa-miR-638	-0.07	-0.07	N/A
FBXO32	ENST00000517956.1	F-box protein 32	500	1	0	0	1	0	hsa-miR-638	-0.07	-0.11	N/A
FYCO1	ENST00000296137.2	FYVE and coiled-coil domain containing 1	91	1	0	0	1	1	hsa-miR-638	-0.07	-0.07	N/A
GOSR2	ENST00000576910.2	golgi SNAP receptor complex member 2	1099	1	0	0	1	0	hsa-miR-638	-0.07	-0.11	N/A
SP1	ENST00000426431.2	Sp1 transcription factor	402	1	0	0	1	0	hsa-miR-638	-0.07	-0.15	N/A
KCND3	ENST00000369697.1	potassium voltage-gated channel, Shal-related subfamily, member 3	23	1	0	0	1	0	hsa-miR-638	-0.07	-0.07	N/A
PLEKHG4B	ENST00000283426.6	pleckstrin homology domain containing, family G (with RhoGef domain) member 4B	5	1	0	1	0	0	hsa-miR-638	-0.07	-0.07	N/A
SYT2	ENST00000367267.1	synaptotagmin II	5	1	0	1	0	2	hsa-miR-638	-0.07	-0.07	N/A
PPP6C	ENST00000373547.4	protein phosphatase 6, catalytic subunit	346	1	0	0	1	1	hsa-miR-638	-0.07	-0.2	N/A
SDAD1	ENST00000356260.5	SDA1 domain containing 1	91	1	0	0	1	0	hsa-miR-638	-0.07	-0.14	N/A
FBXO48	ENST00000377957.3	F-box protein 48	13	1	0	0	1	0	hsa-miR-638	-0.07	-0.18	N/A
RALGAPA2	ENST00000202677.7	Ral GTPase activating protein, alpha subunit 2 (catalytic)	24	1	0	1	0	0	hsa-miR-638	-0.07	-0.09	N/A
PDP2	ENST00000311765.2	pyruvate dehyrogenase phosphatase catalytic subunit 2	102	1	0	0	1	1	hsa-miR-638	-0.07	-0.15	N/A
ZNF788	ENST00000430298.2	zinc finger family member 788	16	1	0	0	1	0	hsa-miR-638	-0.07	-0.22	N/A
NDRG1	ENST00000323851.7	N-myc downstream regulated 1	2195	1	0	0	1	0	hsa-miR-638	-0.07	-0.07	N/A
CLSTN2	ENST00000458420.3	calsyntenin 2	119	1	0	0	1	2	hsa-miR-638	-0.07	-0.11	N/A
SRPX2	ENST00000373004.3	sushi-repeat containing protein, X-linked 2	69	1	0	0	1	1	hsa-miR-638	-0.07	-0.16	N/A
HIPK2	ENST00000406875.3	homeodomain interacting protein kinase 2	48	1	0	0	1	2	hsa-miR-638	-0.07	-0.07	N/A
HPS4	ENST00000398145.2	Hermansky-Pudlak syndrome 4	719	1	0	0	1	1	hsa-miR-638	-0.07	-0.16	N/A
PPM1F	ENST00000263212.5	protein phosphatase, Mg2+/Mn2+ dependent, 1F	786	1	0	0	1	0	hsa-miR-638	-0.07	-0.09	N/A
OTUD7A	ENST00000307050.4	OTU domain containing 7A	35	2	0	1	1	0	hsa-miR-638	-0.07	-0.16	N/A
TYRO3	ENST00000263798.3	TYRO3 protein tyrosine kinase	70	1	0	0	1	1	hsa-miR-638	-0.07	-0.1	N/A
OSBP	ENST00000263847.1	oxysterol binding protein	101	1	0	0	1	0	hsa-miR-638	-0.07	-0.18	N/A
AGFG1	ENST00000310078.8	ArfGAP with FG repeats 1	2019	1	0	0	1	0	hsa-miR-638	-0.07	-0.07	N/A
CRB2	ENST00000373631.3	crumbs homolog 2 (Drosophila)	8	1	0	0	1	0	hsa-miR-638	-0.07	-0.07	N/A
USP6	ENST00000332776.4	ubiquitin specific peptidase 6 (Tre-2 oncogene)	5	1	0	0	1	0	hsa-miR-638	-0.07	-0.07	N/A
TMEM108	ENST00000321871.6	transmembrane protein 108	31	1	0	0	1	1	hsa-miR-638	-0.06	-0.12	N/A
THPO	ENST00000421442.2	thrombopoietin	208	1	0	0	1	1	hsa-miR-638	-0.06	-0.27	N/A
PDLIM5	ENST00000437932.1	PDZ and LIM domain 5	1002	1	0	0	1	0	hsa-miR-638	-0.06	-0.07	N/A
NPTXR	ENST00000333039.2	neuronal pentraxin receptor	578	1	0	0	1	1	hsa-miR-638	-0.06	-0.06	N/A
WNT9A	ENST00000272164.5	wingless-type MMTV integration site family, member 9A	73	1	0	0	1	0	hsa-miR-638	-0.06	-0.06	N/A
CNTNAP2	ENST00000361727.3	contactin associated protein-like 2	29	1	0	0	1	0	hsa-miR-638	-0.06	-0.07	N/A
PITPNA	ENST00000313486.7	phosphatidylinositol transfer protein, alpha	366	1	0	0	1	0	hsa-miR-638	-0.06	-0.14	N/A
USP13	ENST00000263966.3	ubiquitin specific peptidase 13 (isopeptidase T-3)	379	1	0	0	1	1	hsa-miR-638	-0.06	-0.18	N/A
ZNF501	ENST00000396048.2	zinc finger protein 501	24	1	0	0	1	0	hsa-miR-638	-0.06	-0.18	N/A
ECHDC2	ENST00000371522.4	enoyl CoA hydratase domain containing 2	172	1	0	0	1	0	hsa-miR-638	-0.06	-0.21	N/A
RBM28	ENST00000223073.2	RNA binding motif protein 28	297	1	0	0	1	2	hsa-miR-638	-0.06	-0.14	N/A
FOSL2	ENST00000379619.1	FOS-like antigen 2	2255	3	0	1	2	3	hsa-miR-638	-0.06	-0.11	N/A
KIAA1598	ENST00000260777.10	KIAA1598	94	1	0	0	1	0	hsa-miR-638	-0.06	-0.21	N/A
CNTN2	ENST00000331830.4	contactin 2 (axonal)	5	1	0	0	1	1	hsa-miR-638	-0.06	-0.06	N/A
CELF1	ENST00000395290.2	CUGBP, Elav-like family member 1	153	2	0	0	2	1	hsa-miR-638	-0.06	-0.1	N/A
CES2	ENST00000317091.4	carboxylesterase 2	24	1	0	0	1	1	hsa-miR-638	-0.06	-0.21	N/A
FAM129A	ENST00000367511.3	family with sequence similarity 129, member A	213	1	0	0	1	0	hsa-miR-638	-0.06	-0.06	N/A
CNTNAP3	ENST00000297668.6	contactin associated protein-like 3	5	1	0	0	1	1	hsa-miR-638	-0.06	-0.2	N/A
CRTAP	ENST00000320954.6	cartilage associated protein	3154	1	1	0	0	1	hsa-miR-638	-0.06	-0.4	N/A
HEY2	ENST00000368365.1	hairy/enhancer-of-split related with YRPW motif 2	70	1	0	0	1	0	hsa-miR-638	-0.06	-0.23	N/A
AP1S3	ENST00000396654.2	adaptor-related protein complex 1, sigma 3 subunit	130	1	0	0	1	0	hsa-miR-638	-0.06	-0.11	N/A
TFCP2L1	ENST00000263707.5	transcription factor CP2-like 1	36	2	0	0	2	1	hsa-miR-638	-0.06	-0.18	N/A
AGO1	ENST00000373204.4	argonaute RISC catalytic component 1	402	1	0	0	1	1	hsa-miR-638	-0.06	-0.07	N/A
TRIM67	ENST00000444294.3	tripartite motif containing 67	41	1	0	1	0	0	hsa-miR-638	-0.06	-0.1	N/A
FAM126A	ENST00000409923.1	family with sequence similarity 126, member A	241	1	0	0	1	1	hsa-miR-638	-0.06	-0.15	N/A
DPY19L4	ENST00000414645.2	dpy-19-like 4 (C. elegans)	362	1	0	0	1	0	hsa-miR-638	-0.06	-0.18	N/A
IGFBPL1	ENST00000377694.1	insulin-like growth factor binding protein-like 1	13	1	0	0	1	1	hsa-miR-638	-0.06	-0.21	N/A
MEGF8	ENST00000334370.4	multiple EGF-like-domains 8	28	1	0	0	1	0	hsa-miR-638	-0.06	-0.06	N/A
USP32	ENST00000300896.4	ubiquitin specific peptidase 32	85	1	0	0	1	0	hsa-miR-638	-0.06	-0.15	N/A
JPH2	ENST00000372980.3	junctophilin 2	76	1	0	0	1	0	hsa-miR-638	-0.06	-0.07	N/A
INTU	ENST00000335251.6	inturned planar cell polarity protein	105	1	0	0	1	0	hsa-miR-638	-0.06	-0.09	N/A
OPHN1	ENST00000355520.5	oligophrenin 1	54	1	0	0	1	1	hsa-miR-638	-0.06	-0.06	N/A
DPH1	ENST00000263083.6	diphthamide biosynthesis 1	2807	1	0	1	0	0	hsa-miR-638	-0.06	-0.06	N/A
POLQ	ENST00000264233.5	polymerase (DNA directed), theta	51	1	0	0	1	0	hsa-miR-638	-0.06	-0.21	N/A
HIP1	ENST00000336926.6	huntingtin interacting protein 1	37	1	0	0	1	0	hsa-miR-638	-0.06	-0.07	N/A
SETD5	ENST00000402198.1	SET domain containing 5	48	1	0	0	1	0	hsa-miR-638	-0.06	-0.1	N/A
C11orf74	ENST00000534635.1	chromosome 11 open reading frame 74	57	1	0	0	1	0	hsa-miR-638	-0.06	-0.21	N/A
RIMS3	ENST00000372684.3	regulating synaptic membrane exocytosis 3	24	1	0	0	1	1	hsa-miR-638	-0.06	-0.17	N/A
MAVS	ENST00000428216.2	mitochondrial antiviral signaling protein	211	1	0	0	1	1	hsa-miR-638	-0.06	-0.08	N/A
DGKH	ENST00000261491.5	diacylglycerol kinase, eta	46	1	0	0	1	0	hsa-miR-638	-0.06	-0.09	N/A
RPL27A	ENST00000314138.6	ribosomal protein L27a	2641	2	0	1	1	1	hsa-miR-638	-0.06	-0.34	N/A
MTMR9	ENST00000221086.3	myotubularin related protein 9	400	1	0	0	1	1	hsa-miR-638	-0.06	-0.07	N/A
STON2	ENST00000267540.2	stonin 2	40	1	0	0	1	1	hsa-miR-638	-0.06	-0.06	N/A
ZBED3	ENST00000255198.2	zinc finger, BED-type containing 3	399	1	0	0	1	0	hsa-miR-638	-0.05	-0.06	N/A
PCGF2	ENST00000360797.2	polycomb group ring finger 2	545	1	0	0	1	0	hsa-miR-638	-0.05	-0.23	N/A
ZNF10	ENST00000248211.6	zinc finger protein 10	96	1	0	0	1	0	hsa-miR-638	-0.05	-0.07	N/A
ANKEF1	ENST00000378380.3	ankyrin repeat and EF-hand domain containing 1	25	1	0	0	1	0	hsa-miR-638	-0.05	-0.14	N/A
GFRA1	ENST00000439649.3	GDNF family receptor alpha 1	69	1	1	0	0	1	hsa-miR-638	-0.05	-0.2	N/A
PPIG	ENST00000260970.3	peptidylprolyl isomerase G (cyclophilin G)	470	1	0	0	1	0	hsa-miR-638	-0.05	-0.12	N/A
FAM46C	ENST00000369448.3	family with sequence similarity 46, member C	74	1	0	0	1	1	hsa-miR-638	-0.05	-0.19	N/A
RASSF2	ENST00000379400.3	Ras association (RalGDS/AF-6) domain family member 2	88	1	0	0	1	0	hsa-miR-638	-0.05	-0.05	N/A
CCDC144A	ENST00000443444.2	coiled-coil domain containing 144A	5	1	0	0	1	0	hsa-miR-638	-0.05	-0.05	N/A
PTPRE	ENST00000254667.3	protein tyrosine phosphatase, receptor type, E	44	1	0	0	1	0	hsa-miR-638	-0.05	-0.15	N/A
AASS	ENST00000393376.1	aminoadipate-semialdehyde synthase	72	1	0	0	1	0	hsa-miR-638	-0.05	-0.12	N/A
MMP15	ENST00000219271.3	matrix metallopeptidase 15 (membrane-inserted)	605	1	0	0	1	1	hsa-miR-638	-0.05	-0.2	N/A
MEAF6	ENST00000373075.2	MYST/Esa1-associated factor 6	440	1	0	0	1	0	hsa-miR-638	-0.05	-0.21	N/A
HP1BP3	ENST00000312239.5	heterochromatin protein 1, binding protein 3	1886	1	0	0	1	1	hsa-miR-638	-0.05	-0.25	N/A
SNX33	ENST00000308527.5	sorting nexin 33	148	1	0	0	1	2	hsa-miR-638	-0.05	-0.06	N/A
COMMD9	ENST00000263401.5	COMM domain containing 9	1146	1	0	0	1	1	hsa-miR-638	-0.05	-0.29	N/A
PEX26	ENST00000329627.7	peroxisomal biogenesis factor 26	157	1	0	0	1	1	hsa-miR-638	-0.05	-0.14	N/A
TXLNA	ENST00000373610.3	taxilin alpha	564	1	0	0	1	0	hsa-miR-638	-0.05	-0.05	N/A
TSPAN9	ENST00000537971.1	tetraspanin 9	1410	1	0	0	1	0	hsa-miR-638	-0.05	-0.1	N/A
MYPN	ENST00000358913.5	myopalladin	73	2	0	0	2	0	hsa-miR-638	-0.05	-0.22	N/A
CAMK1D	ENST00000378847.3	calcium/calmodulin-dependent protein kinase ID	258	1	0	0	1	1	hsa-miR-638	-0.05	-0.11	N/A
KAT7	ENST00000259021.4	K(lysine) acetyltransferase 7	48	2	0	0	2	0	hsa-miR-638	-0.05	-0.16	N/A
PHKA2	ENST00000379942.4	phosphorylase kinase, alpha 2 (liver)	588	1	0	0	1	1	hsa-miR-638	-0.05	-0.06	N/A
TFAP2B	ENST00000393655.3	transcription factor AP-2 beta (activating enhancer binding protein 2 beta)	23	1	0	1	0	0	hsa-miR-638	-0.05	-0.25	N/A
SLC24A2	ENST00000341998.2	solute carrier family 24 (sodium/potassium/calcium exchanger), member 2	5	1	0	0	1	0	hsa-miR-638	-0.05	-0.05	N/A
CELSR3	ENST00000164024.4	cadherin, EGF LAG seven-pass G-type receptor 3	13	1	0	0	1	0	hsa-miR-638	-0.05	-0.05	N/A
FAM227A	ENST00000535113.1	family with sequence similarity 227, member A	16	1	0	0	1	0	hsa-miR-638	-0.05	-0.11	N/A
ERC1	ENST00000355446.5	ELKS/RAB6-interacting/CAST family member 1	159	2	0	0	2	1	hsa-miR-638	-0.05	-0.05	N/A
ILDR2	ENST00000469934.2	immunoglobulin-like domain containing receptor 2	7	1	0	0	1	0	hsa-miR-638	-0.05	-0.16	N/A
POLA2	ENST00000265465.3	polymerase (DNA directed), alpha 2, accessory subunit	2627	1	0	0	1	1	hsa-miR-638	-0.05	-0.2	N/A
GNE	ENST00000396594.3	glucosamine (UDP-N-acetyl)-2-epimerase/N-acetylmannosamine kinase	22	1	0	0	1	0	hsa-miR-638	-0.05	-0.05	N/A
FZD1	ENST00000287934.2	frizzled family receptor 1	391	1	0	1	0	0	hsa-miR-638	-0.05	-0.05	N/A
ABCG8	ENST00000272286.2	ATP-binding cassette, sub-family G (WHITE), member 8	197	3	0	1	2	0	hsa-miR-638	-0.05	-0.53	N/A
NOL3	ENST00000432069.2	nucleolar protein 3 (apoptosis repressor with CARD domain)	284	1	0	0	1	0	hsa-miR-638	-0.05	-0.29	N/A
UBE2S	ENST00000264552.9	ubiquitin-conjugating enzyme E2S	106	2	0	0	2	0	hsa-miR-638	-0.05	-0.41	N/A
DENND5B	ENST00000389082.5	DENN/MADD domain containing 5B	832	1	0	0	1	0	hsa-miR-638	-0.05	-0.05	N/A
HMX1	ENST00000400677.3	H6 family homeobox 1	171	2	0	1	1	1	hsa-miR-638	-0.05	-0.19	N/A
AMOTL1	ENST00000317837.9	angiomotin like 1	712	1	0	0	1	0	hsa-miR-638	-0.05	-0.05	N/A
SNX1	ENST00000353874.4	sorting nexin 1	1296	1	0	0	1	1	hsa-miR-638	-0.05	-0.07	N/A
KIAA1644	ENST00000381176.4	KIAA1644	10	1	0	0	1	0	hsa-miR-638	-0.05	-0.1	N/A
FRK	ENST00000606080.1	fyn-related kinase	37	1	0	0	1	0	hsa-miR-638	-0.05	-0.1	N/A
TRDMT1	ENST00000377799.3	tRNA aspartic acid methyltransferase 1	248	1	0	0	1	0	hsa-miR-638	-0.05	-0.19	N/A
ZRANB3	ENST00000401392.1	zinc finger, RAN-binding domain containing 3	26	1	0	0	1	0	hsa-miR-638	-0.05	-0.13	N/A
F11R	ENST00000368026.6	F11 receptor	2844	1	0	1	0	1	hsa-miR-638	-0.05	-0.23	N/A
TOX4	ENST00000405508.1	TOX high mobility group box family member 4	309	1	0	0	1	0	hsa-miR-638	-0.05	-0.06	N/A
LINC00346	ENST00000538077.1	long intergenic non-protein coding RNA 346	26	1	0	0	1	1	hsa-miR-638	-0.04	-0.21	N/A
RWDD1	ENST00000466444.2	RWD domain containing 1	296	1	0	0	1	1	hsa-miR-638	-0.04	-0.23	N/A
MYCBP	ENST00000397572.2	MYC binding protein	85	1	0	0	1	0	hsa-miR-638	-0.04	-0.17	N/A
MED7	ENST00000286317.5	mediator complex subunit 7	356	2	0	0	2	0	hsa-miR-638	-0.04	-0.21	N/A
IRGQ	ENST00000422989.1	immunity-related GTPase family, Q	62	1	0	0	1	2	hsa-miR-638	-0.04	-0.19	N/A
PTBP2	ENST00000609116.1	polypyrimidine tract binding protein 2	70	1	0	0	1	0	hsa-miR-638	-0.04	-0.1	N/A
ATP2B1	ENST00000261173.2	ATPase, Ca++ transporting, plasma membrane 1	699	1	0	0	1	0	hsa-miR-638	-0.04	-0.11	N/A
CBS	ENST00000398158.1	cystathionine-beta-synthase	39	1	0	0	1	0	hsa-miR-638	-0.04	-0.09	N/A
PRR14L	ENST00000434485.1	proline rich 14-like	39	1	0	0	1	0	hsa-miR-638	-0.04	-0.04	N/A
LRRC27	ENST00000392638.2	leucine rich repeat containing 27	68	8	0	0	8	1	hsa-miR-638	-0.04	-0.71	N/A
HEATR1	ENST00000366582.3	HEAT repeat containing 1	282	1	0	0	1	0	hsa-miR-638	-0.04	-0.18	N/A
RNF41	ENST00000345093.4	ring finger protein 41	152	1	0	0	1	1	hsa-miR-638	-0.04	-0.21	N/A
MPP6	ENST00000222644.5	membrane protein, palmitoylated 6 (MAGUK p55 subfamily member 6)	389	1	0	0	1	0	hsa-miR-638	-0.04	-0.13	N/A
RP11-195F19.5	ENST00000416454.1	HCG2040265, isoform CRA_a; Uncharacterized protein; cDNA FLJ50015	18	1	0	0	1	1	hsa-miR-638	-0.04	-0.35	N/A
TTC39B	ENST00000512701.2	tetratricopeptide repeat domain 39B	161	1	0	0	1	0	hsa-miR-638	-0.04	-0.06	N/A
CLDN19	ENST00000296387.1	claudin 19	25	1	0	0	1	1	hsa-miR-638	-0.04	-0.21	N/A
SLC7A14	ENST00000231706.5	solute carrier family 7, member 14	5	1	0	0	1	0	hsa-miR-638	-0.04	-0.04	N/A
RNMT	ENST00000383314.2	RNA (guanine-7-) methyltransferase	64	1	0	0	1	0	hsa-miR-638	-0.04	-0.06	N/A
P2RY2	ENST00000311131.2	purinergic receptor P2Y, G-protein coupled, 2	66	1	0	0	1	0	hsa-miR-638	-0.04	-0.14	N/A
BSND	ENST00000371265.4	Bartter syndrome, infantile, with sensorineural deafness (Barttin)	5	1	0	0	1	1	hsa-miR-638	-0.04	-0.12	N/A
ZNF207	ENST00000394670.4	zinc finger protein 207	839	1	0	1	0	0	hsa-miR-638	-0.04	-0.06	N/A
VAV3	ENST00000370056.4	vav 3 guanine nucleotide exchange factor	1128	1	0	0	1	2	hsa-miR-638	-0.04	-0.22	N/A
USP14	ENST00000261601.7	ubiquitin specific peptidase 14 (tRNA-guanine transglycosylase)	561	1	0	0	1	0	hsa-miR-638	-0.04	-0.09	N/A
KDM5A	ENST00000399788.2	lysine (K)-specific demethylase 5A	118	1	0	0	1	1	hsa-miR-638	-0.04	-0.08	N/A
UBE2D3	ENST00000453744.2	ubiquitin-conjugating enzyme E2D 3	2312	2	0	0	2	1	hsa-miR-638	-0.04	-0.46	N/A
UMPS	ENST00000232607.2	uridine monophosphate synthetase	374	1	0	0	1	1	hsa-miR-638	-0.04	-0.22	N/A
HSPBAP1	ENST00000383659.1	HSPB (heat shock 27kDa) associated protein 1	22	1	0	0	1	0	hsa-miR-638	-0.04	-0.18	N/A
IFNE	ENST00000448696.3	interferon, epsilon	65	1	0	0	1	0	hsa-miR-638	-0.04	-0.13	N/A
FOXD3	ENST00000371116.2	forkhead box D3	7	1	0	0	1	0	hsa-miR-638	-0.04	-0.17	N/A
C11orf58	ENST00000228136.4	chromosome 11 open reading frame 58	1782	1	0	0	1	0	hsa-miR-638	-0.04	-0.19	N/A
TBC1D16	ENST00000310924.2	TBC1 domain family, member 16	556	2	0	1	1	1	hsa-miR-638	-0.04	-0.08	N/A
SCN8A	ENST00000354534.6	sodium channel, voltage gated, type VIII, alpha subunit	44	1	0	0	1	2	hsa-miR-638	-0.04	-0.04	N/A
PLA2R1	ENST00000283243.7	phospholipase A2 receptor 1, 180kDa	41	1	0	0	1	0	hsa-miR-638	-0.04	-0.09	N/A
IKZF3	ENST00000346872.3	IKAROS family zinc finger 3 (Aiolos)	7	1	0	0	1	0	hsa-miR-638	-0.04	-0.12	N/A
RPL10A	ENST00000322203.6	ribosomal protein L10a	81	1	0	0	1	0	hsa-miR-638	-0.04	-0.12	N/A
HSPA5	ENST00000324460.6	heat shock 70kDa protein 5 (glucose-regulated protein, 78kDa)	2715	1	0	0	1	0	hsa-miR-638	-0.04	-0.17	N/A
SRSF12	ENST00000452027.2	serine/arginine-rich splicing factor 12	53	1	0	0	1	0	hsa-miR-638	-0.04	-0.23	N/A
ZNHIT6	ENST00000431532.2	zinc finger, HIT-type containing 6	201	1	0	0	1	0	hsa-miR-638	-0.04	-0.18	N/A
USP6NL	ENST00000609104.1	USP6 N-terminal like	183	1	0	0	1	1	hsa-miR-638	-0.04	-0.16	N/A
ZNF695	ENST00000487338.2	zinc finger protein 695	123	1	0	0	1	0	hsa-miR-638	-0.04	-0.11	N/A
ATP11A	ENST00000487903.1	ATPase, class VI, type 11A	731	1	0	0	1	0	hsa-miR-638	-0.04	-0.04	N/A
SNX27	ENST00000368843.3	sorting nexin family member 27	46	1	0	0	1	1	hsa-miR-638	-0.04	-0.04	N/A
POLR1A	ENST00000263857.6	polymerase (RNA) I polypeptide A, 194kDa	675	1	0	0	1	0	hsa-miR-638	-0.03	-0.07	N/A
NKX6-2	ENST00000368592.5	NK6 homeobox 2	17	1	0	0	1	0	hsa-miR-638	-0.03	-0.16	N/A
TTC28	ENST00000397906.2	tetratricopeptide repeat domain 28	227	1	0	0	1	2	hsa-miR-638	-0.03	-0.15	N/A
TIMM8B	ENST00000504148.2	translocase of inner mitochondrial membrane 8 homolog B (yeast)	12	1	0	0	1	0	hsa-miR-638	-0.03	-0.3	N/A
HOXB13	ENST00000290295.7	homeobox B13	80	2	0	1	1	0	hsa-miR-638	-0.03	-0.36	N/A
RAB11FIP4	ENST00000325874.8	RAB11 family interacting protein 4 (class II)	169	1	0	0	1	0	hsa-miR-638	-0.03	-0.09	N/A
MT1A	ENST00000290705.8	metallothionein 1A	19	1	0	0	1	2	hsa-miR-638	-0.03	-0.17	N/A
PCBD1	ENST00000299299.3	pterin-4 alpha-carbinolamine dehydratase/dimerization cofactor of hepatocyte nuclear factor 1 alpha	286	1	0	0	1	0	hsa-miR-638	-0.03	-0.24	N/A
DUSP3	ENST00000226004.3	dual specificity phosphatase 3	836	2	0	0	2	1	hsa-miR-638	-0.03	-0.29	N/A
OXNAD1	ENST00000285083.5	oxidoreductase NAD-binding domain containing 1	230	1	0	0	1	0	hsa-miR-638	-0.03	-0.17	N/A
CLCN4	ENST00000380833.4	chloride channel, voltage-sensitive 4	182	1	0	0	1	1	hsa-miR-638	-0.03	-0.04	N/A
GOSR1	ENST00000225724.5	golgi SNAP receptor complex member 1	668	1	0	0	1	0	hsa-miR-638	-0.03	-0.06	N/A
GPRASP1	ENST00000361600.5	G protein-coupled receptor associated sorting protein 1	25	1	0	0	1	0	hsa-miR-638	-0.03	-0.17	N/A
SEC22A	ENST00000481965.2	SEC22 vesicle trafficking protein homolog A (S. cerevisiae)	294	1	0	0	1	0	hsa-miR-638	-0.03	-0.27	N/A
PABPC1	ENST00000318607.5	poly(A) binding protein, cytoplasmic 1	95	1	0	0	1	0	hsa-miR-638	-0.03	-0.17	N/A
PGPEP1	ENST00000597431.2	pyroglutamyl-peptidase I	82	2	0	0	2	0	hsa-miR-638	-0.03	-0.27	N/A
SYT7	ENST00000263846.4	synaptotagmin VII	192	1	0	0	1	2	hsa-miR-638	-0.03	-0.17	N/A
ZFP82	ENST00000392161.3	ZFP82 zinc finger protein	42	1	0	0	1	0	hsa-miR-638	-0.03	-0.14	N/A
ENTPD7	ENST00000370489.4	ectonucleoside triphosphate diphosphohydrolase 7	136	2	0	0	2	1	hsa-miR-638	-0.03	-0.09	N/A
TENM4	ENST00000278550.7	teneurin transmembrane protein 4	34	2	0	1	1	2	hsa-miR-638	-0.03	-0.19	N/A
GJA9	ENST00000454994.2	gap junction protein, alpha 9, 59kDa	85	1	0	0	1	0	hsa-miR-638	-0.03	-0.12	N/A
NME6	ENST00000450160.1	NME/NM23 nucleoside diphosphate kinase 6	511	1	0	0	1	1	hsa-miR-638	-0.03	-0.15	N/A
HEATR6	ENST00000184956.6	HEAT repeat containing 6	385	1	0	0	1	0	hsa-miR-638	-0.03	-0.13	N/A
ALDH1L2	ENST00000258494.9	aldehyde dehydrogenase 1 family, member L2	22	1	0	0	1	0	hsa-miR-638	-0.03	-0.07	N/A
HIC2	ENST00000407464.2	hypermethylated in cancer 2	28	1	0	0	1	2	hsa-miR-638	-0.03	-0.16	N/A
DYNC1I2	ENST00000409453.1	dynein, cytoplasmic 1, intermediate chain 2	69	1	0	0	1	0	hsa-miR-638	-0.03	-0.18	N/A
PTPRT	ENST00000373187.1	protein tyrosine phosphatase, receptor type, T	5	1	0	0	1	1	hsa-miR-638	-0.03	-0.03	N/A
TRUB2	ENST00000372890.4	TruB pseudouridine (psi) synthase family member 2	91	1	0	1	0	0	hsa-miR-638	-0.03	-0.15	N/A
RAB11FIP5	ENST00000258098.6	RAB11 family interacting protein 5 (class I)	81	1	0	0	1	0	hsa-miR-638	-0.03	-0.11	N/A
MECP2	ENST00000303391.6	methyl CpG binding protein 2 (Rett syndrome)	1474	2	1	0	1	2	hsa-miR-638	-0.03	-0.16	N/A
AP5S1	ENST00000379573.2	adaptor-related protein complex 5, sigma 1 subunit	492	1	0	0	1	2	hsa-miR-638	-0.03	-0.18	N/A
TOMM20	ENST00000366607.4	translocase of outer mitochondrial membrane 20 homolog (yeast)	674	1	0	0	1	0	hsa-miR-638	-0.03	-0.15	N/A
NRG2	ENST00000394770.1	neuregulin 2	9	1	0	0	1	0	hsa-miR-638	-0.03	-0.11	N/A
FECH	ENST00000262093.5	ferrochelatase	716	1	0	0	1	2	hsa-miR-638	-0.03	-0.17	N/A
GPR114	ENST00000340339.4	G protein-coupled receptor 114	5	1	0	0	1	0	hsa-miR-638	-0.03	-0.03	N/A
FNBP1	ENST00000355681.3	formin binding protein 1	165	1	0	0	1	0	hsa-miR-638	-0.03	-0.16	N/A
GATAD2B	ENST00000368655.4	GATA zinc finger domain containing 2B	48	1	0	0	1	0	hsa-miR-638	-0.03	-0.05	N/A
ZMIZ2	ENST00000309315.4	zinc finger, MIZ-type containing 2	761	1	0	0	1	0	hsa-miR-638	-0.03	-0.08	N/A
SLFN5	ENST00000299977.4	schlafen family member 5	195	1	0	0	1	0	hsa-miR-638	-0.03	-0.05	N/A
SMAGP	ENST00000603798.1	small cell adhesion glycoprotein	103	1	0	0	1	0	hsa-miR-638	-0.03	-0.17	N/A
C15orf38	ENST00000357484.5	chromosome 15 open reading frame 38	325	1	0	0	1	1	hsa-miR-638	-0.03	-0.22	N/A
SGSM1	ENST00000400358.4	small G protein signaling modulator 1	25	1	0	0	1	0	hsa-miR-638	-0.03	-0.14	N/A
RFTN2	ENST00000295049.4	raftlin family member 2	21	1	0	0	1	0	hsa-miR-638	-0.03	-0.12	N/A
PIK3C3	ENST00000262039.4	phosphatidylinositol 3-kinase, catalytic subunit type 3	286	1	0	0	1	1	hsa-miR-638	-0.03	-0.12	N/A
PSMD14	ENST00000409682.3	proteasome (prosome, macropain) 26S subunit, non-ATPase, 14	194	1	0	0	1	0	hsa-miR-638	-0.03	-0.34	N/A
MTAP	ENST00000380172.4	methylthioadenosine phosphorylase	1575	1	0	0	1	0	hsa-miR-638	-0.03	-0.14	N/A
FOXK2	ENST00000335255.5	forkhead box K2	450	1	0	0	1	0	hsa-miR-638	-0.03	-0.15	N/A
PRKCA	ENST00000413366.3	protein kinase C, alpha	726	1	0	0	1	0	hsa-miR-638	-0.03	-0.05	N/A
HIF1AN	ENST00000299163.6	hypoxia inducible factor 1, alpha subunit inhibitor	1545	2	0	0	2	1	hsa-miR-638	-0.03	-0.26	N/A
LRFN3	ENST00000588831.1	leucine rich repeat and fibronectin type III domain containing 3	207	1	0	0	1	0	hsa-miR-638	-0.03	-0.17	N/A
PNPLA4	ENST00000381042.4	patatin-like phospholipase domain containing 4	357	1	0	0	1	0	hsa-miR-638	-0.03	-0.23	N/A
ERI2	ENST00000569729.1	ERI1 exoribonuclease family member 2	96	1	0	0	1	0	hsa-miR-638	-0.03	-0.15	N/A
LIMK2	ENST00000331728.4	LIM domain kinase 2	233	1	0	0	1	0	hsa-miR-638	-0.03	-0.03	N/A
PTCHD1	ENST00000379361.4	patched domain containing 1	59	1	0	0	1	3	hsa-miR-638	-0.02	-0.18	N/A
TOMM40	ENST00000592434.1	translocase of outer mitochondrial membrane 40 homolog (yeast)	14	1	0	0	1	0	hsa-miR-638	-0.02	-0.16	N/A
TCEB1	ENST00000518127.1	transcription elongation factor B (SIII), polypeptide 1 (15kDa, elongin C)	637	1	0	0	1	0	hsa-miR-638	-0.02	-0.23	N/A
SLC2A5	ENST00000377424.4	solute carrier family 2 (facilitated glucose/fructose transporter), member 5	30	1	0	0	1	0	hsa-miR-638	-0.02	-0.15	N/A
SMIM12	ENST00000521580.2	small integral membrane protein 12	1091	2	1	0	1	0	hsa-miR-638	-0.02	-0.6	N/A
ARL5B	ENST00000377275.3	ADP-ribosylation factor-like 5B	368	1	0	0	1	0	hsa-miR-638	-0.02	-0.17	N/A
RALY	ENST00000375114.3	RALY heterogeneous nuclear ribonucleoprotein	1489	1	0	0	1	0	hsa-miR-638	-0.02	-0.16	N/A
ANAPC16	ENST00000299381.4	anaphase promoting complex subunit 16	986	1	0	0	1	1	hsa-miR-638	-0.02	-0.24	N/A
SLC8A1	ENST00000406785.2	solute carrier family 8 (sodium/calcium exchanger), member 1	61	1	1	0	0	1	hsa-miR-638	-0.02	-0.17	N/A
TUBB	ENST00000327892.8	tubulin, beta class I	133	1	0	0	1	0	hsa-miR-638	-0.02	-0.23	N/A
ZNF439	ENST00000304030.2	zinc finger protein 439	64	1	0	0	1	0	hsa-miR-638	-0.02	-0.16	N/A
PHF14	ENST00000403050.3	PHD finger protein 14	112	1	0	0	1	0	hsa-miR-638	-0.02	-0.14	N/A
SH3PXD2A	ENST00000369774.4	SH3 and PX domains 2A	152	1	0	0	1	1	hsa-miR-638	-0.02	-0.03	N/A
REST	ENST00000309042.7	RE1-silencing transcription factor	31	1	0	0	1	0	hsa-miR-638	-0.02	-0.15	N/A
TPGS1	ENST00000359315.5	tubulin polyglutamylase complex subunit 1	81	1	0	0	1	0	hsa-miR-638	-0.02	-0.12	N/A
HEBP2	ENST00000607197.1	heme binding protein 2	252	1	0	0	1	2	hsa-miR-638	-0.02	-0.11	N/A
KCNJ12	ENST00000583088.1	potassium inwardly-rectifying channel, subfamily J, member 12	9	1	0	0	1	0	hsa-miR-638	-0.02	-0.02	N/A
ZNF780A	ENST00000450241.2	zinc finger protein 780A	44	1	0	0	1	1	hsa-miR-638	-0.02	-0.13	N/A
BRCC3	ENST00000369462.1	BRCA1/BRCA2-containing complex, subunit 3	14	1	0	0	1	0	hsa-miR-638	-0.02	-0.1	N/A
GALNT15	ENST00000339732.5	UDP-N-acetyl-alpha-D-galactosamine:polypeptide N-acetylgalactosaminyltransferase 15	114	1	0	0	1	0	hsa-miR-638	-0.02	-0.17	N/A
ZDHHC3	ENST00000296127.3	zinc finger, DHHC-type containing 3	426	1	0	0	1	4	hsa-miR-638	-0.02	-0.1	N/A
H2AFJ	ENST00000544848.1	H2A histone family, member J	482	1	0	0	1	0	hsa-miR-638	-0.02	-0.26	N/A
THAP1	ENST00000345117.2	THAP domain containing, apoptosis associated protein 1	196	1	0	0	1	1	hsa-miR-638	-0.02	-0.19	N/A
FLRT2	ENST00000330753.4	fibronectin leucine rich transmembrane protein 2	73	1	0	0	1	0	hsa-miR-638	-0.02	-0.08	N/A
MED28	ENST00000237380.7	mediator complex subunit 28	1483	1	0	0	1	1	hsa-miR-638	-0.02	-0.23	N/A
TNFRSF13C	ENST00000291232.3	tumor necrosis factor receptor superfamily, member 13C	36	2	0	0	2	1	hsa-miR-638	-0.02	-0.11	N/A
ZNF793	ENST00000445217.1	zinc finger protein 793	22	1	0	0	1	0	hsa-miR-638	-0.02	-0.05	N/A
MED22	ENST00000344469.5	mediator complex subunit 22	43	1	0	0	1	0	hsa-miR-638	-0.02	-0.1	N/A
NCAM1	ENST00000316851.7	neural cell adhesion molecule 1	19	1	0	0	1	0	hsa-miR-638	-0.02	-0.08	N/A
ADCYAP1R1	ENST00000304166.4	adenylate cyclase activating polypeptide 1 (pituitary) receptor type I	9	1	0	0	1	2	hsa-miR-638	-0.02	-0.07	N/A
ZNF324B	ENST00000336614.4	zinc finger protein 324B	19	1	0	1	0	0	hsa-miR-638	-0.02	-0.02	N/A
GRM1	ENST00000392299.2	glutamate receptor, metabotropic 1	5	1	0	1	0	0	hsa-miR-638	-0.02	-0.02	N/A
KIF1B	ENST00000377086.1	kinesin family member 1B	234	1	0	0	1	0	hsa-miR-638	-0.02	-0.02	N/A
PRDM2	ENST00000235372.7	PR domain containing 2, with ZNF domain	29	1	0	1	0	0	hsa-miR-638	-0.02	-0.02	N/A
PPIE	ENST00000324379.5	peptidylprolyl isomerase E (cyclophilin E)	376	3	0	1	2	0	hsa-miR-638	-0.02	-0.46	N/A
NAA38	ENST00000249299.2	N(alpha)-acetyltransferase 38, NatC auxiliary subunit	458	1	0	0	1	0	hsa-miR-638	-0.02	-0.21	N/A
KIAA1549L	ENST00000321505.4	KIAA1549-like	117	1	0	0	1	0	hsa-miR-638	-0.02	-0.05	N/A
PELI3	ENST00000320740.7	pellino E3 ubiquitin protein ligase family member 3	257	1	0	0	1	0	hsa-miR-638	-0.02	-0.14	N/A
C2orf68	ENST00000306336.5	chromosome 2 open reading frame 68	565	1	0	0	1	1	hsa-miR-638	-0.02	-0.22	N/A
FRZB	ENST00000295113.4	frizzled-related protein	43	1	0	0	1	0	hsa-miR-638	-0.02	-0.17	N/A
SZT2	ENST00000562955.1	seizure threshold 2 homolog (mouse)	123	2	0	0	2	1	hsa-miR-638	-0.02	-0.05	N/A
ERBB4	ENST00000342788.4	v-erb-b2 avian erythroblastic leukemia viral oncogene homolog 4	27	1	0	0	1	0	hsa-miR-638	-0.02	-0.02	N/A
CDC73	ENST00000367435.3	cell division cycle 73	579	1	0	0	1	0	hsa-miR-638	-0.02	-0.12	N/A
ESYT2	ENST00000251527.5	extended synaptotagmin-like protein 2	529	1	0	0	1	0	hsa-miR-638	-0.02	-0.11	N/A
CD248	ENST00000311330.3	CD248 molecule, endosialin	439	1	0	0	1	1	hsa-miR-638	-0.02	-0.11	N/A
LPHN3	ENST00000512091.2	latrophilin 3	93	2	0	0	2	2	hsa-miR-638	-0.02	-0.17	N/A
TPRA1	ENST00000296210.7	transmembrane protein, adipocyte asscociated 1	44	1	0	0	1	0	hsa-miR-638	-0.02	-0.12	N/A
SLC20A2	ENST00000342228.3	solute carrier family 20 (phosphate transporter), member 2	1188	1	0	0	1	0	hsa-miR-638	-0.02	-0.26	N/A
CMSS1	ENST00000421999.2	cms1 ribosomal small subunit homolog (yeast)	423	1	0	0	1	2	hsa-miR-638	-0.02	-0.25	N/A
CHCHD7	ENST00000518801.1	coiled-coil-helix-coiled-coil-helix domain containing 7	1416	1	0	0	1	0	hsa-miR-638	-0.02	-0.18	N/A
TRAF5	ENST00000261464.5	TNF receptor-associated factor 5	250	1	0	0	1	0	hsa-miR-638	-0.02	-0.15	N/A
RNF115	ENST00000369291.5	ring finger protein 115	757	1	0	0	1	1	hsa-miR-638	-0.02	-0.16	N/A
ITCH	ENST00000374864.4	itchy E3 ubiquitin protein ligase	769	1	0	0	1	1	hsa-miR-638	-0.02	-0.05	N/A
FITM2	ENST00000396825.3	fat storage-inducing transmembrane protein 2	215	1	0	0	1	0	hsa-miR-638	-0.02	-0.02	N/A
C19orf52	ENST00000270502.6	chromosome 19 open reading frame 52	792	1	0	0	1	0	hsa-miR-638	-0.02	-0.15	N/A
SLC38A9	ENST00000396865.2	solute carrier family 38, member 9	156	2	0	0	2	2	hsa-miR-638	-0.02	-0.23	N/A
DDX18	ENST00000263239.2	DEAD (Asp-Glu-Ala-Asp) box polypeptide 18	141	1	0	0	1	0	hsa-miR-638	-0.02	-0.23	N/A
MAP1LC3B	ENST00000268607.5	microtubule-associated protein 1 light chain 3 beta	18	1	0	0	1	0	hsa-miR-638	-0.02	-0.14	N/A
ZSCAN16	ENST00000340487.4	zinc finger and SCAN domain containing 16	66	1	0	0	1	1	hsa-miR-638	-0.02	-0.27	N/A
ANKMY1	ENST00000373318.2	ankyrin repeat and MYND domain containing 1	30	1	0	0	1	0	hsa-miR-638	-0.02	-0.09	N/A
RP11-343C2.12	ENST00000562949.1	Conserved oligomeric Golgi complex subunit 8	190	2	0	0	2	1	hsa-miR-638	-0.02	-0.37	N/A
NUP155	ENST00000231498.3	nucleoporin 155kDa	814	1	0	1	0	1	hsa-miR-638	-0.02	-0.02	N/A
MEF2C	ENST00000340208.5	myocyte enhancer factor 2C	70	1	0	0	1	0	hsa-miR-638	-0.02	-0.21	N/A
PITPNC1	ENST00000580974.1	phosphatidylinositol transfer protein, cytoplasmic 1	797	1	0	0	1	0	hsa-miR-638	-0.02	-0.23	N/A
ZBTB25	ENST00000608382.1	zinc finger and BTB domain containing 25	149	1	0	0	1	0	hsa-miR-638	-0.02	-0.14	N/A
POLR1B	ENST00000409894.3	polymerase (RNA) I polypeptide B, 128kDa	996	1	0	0	1	0	hsa-miR-638	-0.02	-0.13	N/A
SETD3	ENST00000331768.5	SET domain containing 3	58	1	0	0	1	0	hsa-miR-638	-0.02	-0.02	N/A
TMEM55A	ENST00000285419.3	transmembrane protein 55A	151	1	0	0	1	0	hsa-miR-638	-0.02	-0.25	N/A
NEURL	ENST00000369780.4	neuralized homolog (Drosophila)	164	1	0	0	1	0	hsa-miR-638	-0.02	-0.15	N/A
RAB6B	ENST00000285208.4	RAB6B, member RAS oncogene family	669	1	0	0	1	0	hsa-miR-638	-0.02	-0.15	N/A
E2F2	ENST00000361729.2	E2F transcription factor 2	96	1	0	1	0	0	hsa-miR-638	-0.02	-0.1	N/A
RND2	ENST00000544533.1	Rho family GTPase 2	26	1	0	0	1	0	hsa-miR-638	-0.02	-0.08	N/A
CSRNP2	ENST00000228515.1	cysteine-serine-rich nuclear protein 2	104	1	0	0	1	0	hsa-miR-638	-0.02	-0.21	N/A
LAMTOR3	ENST00000499666.2	late endosomal/lysosomal adaptor, MAPK and MTOR activator 3	67	1	0	0	1	0	hsa-miR-638	-0.02	-0.13	N/A
PDF	ENST00000288022.1	peptide deformylase (mitochondrial)	190	2	0	0	2	1	hsa-miR-638	-0.01	-0.34	N/A
DDB1	ENST00000301764.7	damage-specific DNA binding protein 1, 127kDa	22506	1	0	0	1	1	hsa-miR-638	-0.01	-0.11	N/A
RBM23	ENST00000555209.1	RNA binding motif protein 23	1540	2	1	0	1	2	hsa-miR-638	-0.01	-0.52	N/A
NUP205	ENST00000285968.6	nucleoporin 205kDa	11	1	0	0	1	0	hsa-miR-638	-0.01	-0.05	N/A
GJC1	ENST00000426548.1	gap junction protein, gamma 1, 45kDa	195	1	0	0	1	0	hsa-miR-638	-0.01	-0.08	N/A
AGO3	ENST00000373191.4	argonaute RISC catalytic component 3	198	2	0	0	2	0	hsa-miR-638	-0.01	-0.06	N/A
RPL24	ENST00000495401.1	ribosomal protein L24	67	1	0	0	1	0	hsa-miR-638	-0.01	-0.23	N/A
AHCY	ENST00000217426.2	adenosylhomocysteinase	27	1	0	0	1	0	hsa-miR-638	-0.01	-0.18	N/A
SKI	ENST00000378536.4	v-ski avian sarcoma viral oncogene homolog	613	1	0	1	0	0	hsa-miR-638	-0.01	-0.02	N/A
NAGK	ENST00000418807.3	N-acetylglucosamine kinase	69	1	0	1	0	0	hsa-miR-638	-0.01	-0.21	N/A
RAB13	ENST00000368575.3	RAB13, member RAS oncogene family	26	1	1	0	0	0	hsa-miR-638	-0.01	-0.26	N/A
DDR2	ENST00000367922.3	discoidin domain receptor tyrosine kinase 2	41	1	0	0	1	1	hsa-miR-638	-0.01	-0.12	N/A
POLL	ENST00000370168.3	polymerase (DNA directed), lambda	139	1	0	0	1	0	hsa-miR-638	-0.01	-0.08	N/A
SIKE1	ENST00000369528.5	suppressor of IKBKE 1	281	1	0	0	1	0	hsa-miR-638	-0.01	-0.16	N/A
C21orf58	ENST00000397683.1	chromosome 21 open reading frame 58	34	1	0	0	1	0	hsa-miR-638	-0.01	-0.09	N/A
SCUBE2	ENST00000457346.2	signal peptide, CUB domain, EGF-like 2	57	1	0	0	1	0	hsa-miR-638	-0.01	-0.16	N/A
BUB1	ENST00000535254.1	BUB1 mitotic checkpoint serine/threonine kinase	515	1	0	0	1	0	hsa-miR-638	-0.01	-0.18	N/A
TPGS2	ENST00000334295.4	tubulin polyglutamylase complex subunit 2	508	1	0	0	1	1	hsa-miR-638	-0.01	-0.17	N/A
ZNF180	ENST00000391956.4	zinc finger protein 180	195	1	0	0	1	1	hsa-miR-638	-0.01	-0.23	N/A
TNS4	ENST00000254051.6	tensin 4	40	1	0	0	1	1	hsa-miR-638	-0.01	-0.11	N/A
UBE2L3	ENST00000342192.4	ubiquitin-conjugating enzyme E2L 3	1318	1	0	1	0	0	hsa-miR-638	-0.01	-0.25	N/A
KIAA0101	ENST00000558008.1	KIAA0101	6821	1	0	0	1	0	hsa-miR-638	-0.01	-0.2	N/A
TIMM50	ENST00000599794.1	translocase of inner mitochondrial membrane 50 homolog (S. cerevisiae)	2210	1	0	0	1	0	hsa-miR-638	-0.01	-0.13	N/A
CTH	ENST00000411986.2	cystathionase (cystathionine gamma-lyase)	430	1	0	0	1	0	hsa-miR-638	-0.01	-0.07	N/A
PAK1IP1	ENST00000379568.3	PAK1 interacting protein 1	135	1	0	0	1	0	hsa-miR-638	-0.01	-0.2	N/A
MRPS11	ENST00000325844.4	mitochondrial ribosomal protein S11	1452	1	0	0	1	0	hsa-miR-638	-0.01	-0.15	N/A
MTG1	ENST00000317502.6	mitochondrial ribosome-associated GTPase 1	1071	1	0	0	1	1	hsa-miR-638	-0.01	-0.16	N/A
RP11-108K14.8	ENST00000468317.2	Mitochondrial GTPase 1	1071	1	0	0	1	1	hsa-miR-638	-0.01	-0.16	N/A
USP9X	ENST00000324545.8	ubiquitin specific peptidase 9, X-linked	2433	1	0	0	1	0	hsa-miR-638	-0.01	-0.14	N/A
FAM155B	ENST00000252338.4	family with sequence similarity 155, member B	21	1	0	0	1	0	hsa-miR-638	-0.01	-0.01	N/A
KDM5B	ENST00000367265.3	lysine (K)-specific demethylase 5B	187	1	0	0	1	0	hsa-miR-638	-0.01	-0.09	N/A
GAS7	ENST00000437099.2	growth arrest-specific 7	186	1	0	0	1	0	hsa-miR-638	-0.01	-0.17	N/A
AMD1	ENST00000368885.3	adenosylmethionine decarboxylase 1	725	1	0	0	1	0	hsa-miR-638	-0.01	-0.06	N/A
POLR3B	ENST00000228347.4	polymerase (RNA) III (DNA directed) polypeptide B	96	1	0	0	1	0	hsa-miR-638	-0.01	-0.23	N/A
PARVB	ENST00000338758.7	parvin, beta	444	1	0	0	1	0	hsa-miR-638	-0.01	-0.04	N/A
MLPH	ENST00000264605.3	melanophilin	85	1	0	0	1	0	hsa-miR-638	-0.01	-0.21	N/A
RPP14	ENST00000445193.3	ribonuclease P/MRP 14kDa subunit	1612	1	1	0	0	0	hsa-miR-638	-0.01	-0.17	N/A
C18orf21	ENST00000592875.1	chromosome 18 open reading frame 21	410	1	0	0	1	0	hsa-miR-638	-0.01	-0.21	N/A
TRPM2	ENST00000300482.5	transient receptor potential cation channel, subfamily M, member 2	60	1	0	1	0	0	hsa-miR-638	-0.01	-0.14	N/A
CENPA	ENST00000335756.4	centromere protein A	360	1	0	0	1	1	hsa-miR-638	-0.01	-0.18	N/A
SOCS7	ENST00000577233.1	suppressor of cytokine signaling 7	15	1	0	0	1	0	hsa-miR-638	-0.01	-0.11	N/A
PACS1	ENST00000320580.4	phosphofurin acidic cluster sorting protein 1	87	1	0	0	1	0	hsa-miR-638	-0.01	-0.04	N/A
GLRX2	ENST00000367439.3	glutaredoxin 2	310	1	0	0	1	1	hsa-miR-638	-0.01	-0.26	N/A
COG8	ENST00000306875.4	component of oligomeric golgi complex 8	190	2	0	0	2	1	hsa-miR-638	-0.01	-0.27	N/A
DBF4	ENST00000265728.1	DBF4 homolog (S. cerevisiae)	30	1	0	0	1	0	hsa-miR-638	-0.01	-0.06	N/A
TSKU	ENST00000333090.4	tsukushi, small leucine rich proteoglycan	293	1	0	0	1	1	hsa-miR-638	-0.01	-0.12	N/A
DNAL1	ENST00000553645.2	dynein, axonemal, light chain 1	81	1	0	0	1	0	hsa-miR-638	-0.01	-0.11	N/A
HTATIP2	ENST00000451739.2	HIV-1 Tat interactive protein 2, 30kDa	380	2	0	0	2	0	hsa-miR-638	-0.01	-0.56	N/A
SLC45A4	ENST00000519067.1	solute carrier family 45, member 4	418	1	0	0	1	1	hsa-miR-638	-0.01	-0.15	N/A
TBRG4	ENST00000258770.3	transforming growth factor beta regulator 4	129	1	0	0	1	0	hsa-miR-638	-0.01	-0.09	N/A
SOD2	ENST00000538183.2	superoxide dismutase 2, mitochondrial	993	3	0	0	3	3	hsa-miR-638	-0.01	-0.33	N/A
KCNC3	ENST00000376959.2	potassium voltage-gated channel, Shaw-related subfamily, member 3	5	1	0	0	1	0	hsa-miR-638	-0.01	-0.01	N/A
TSPAN11	ENST00000261177.9	tetraspanin 11	27	1	0	0	1	0	hsa-miR-638	-0.01	-0.01	N/A
PVRL1	ENST00000264025.3	poliovirus receptor-related 1 (herpesvirus entry mediator C)	50	1	0	0	1	1	hsa-miR-638	-0.01	-0.01	N/A
LDOC1L	ENST00000341255.3	leucine zipper, down-regulated in cancer 1-like	348	1	0	0	1	0	hsa-miR-638	-0.01	-0.01	N/A
DST	ENST00000312431.6	dystonin	439	1	0	0	1	1	hsa-miR-638	-0.01	-0.01	N/A
ZNF780B	ENST00000434248.1	zinc finger protein 780B	77	1	0	0	1	2	hsa-miR-638	-0.01	-0.11	N/A
DICER1	ENST00000541352.1	dicer 1, ribonuclease type III	25	1	0	0	1	1	hsa-miR-638	-0.01	-0.09	N/A
GZF1	ENST00000338121.5	GDNF-inducible zinc finger protein 1	252	1	0	0	1	0	hsa-miR-638	-0.01	-0.04	N/A
DLK1	ENST00000341267.4	delta-like 1 homolog (Drosophila)	1865	2	1	1	0	1	hsa-miR-638	-0.01	-0.55	N/A
ZNF24	ENST00000589881.1	zinc finger protein 24	1796	1	0	0	1	0	hsa-miR-638	-0.01	-0.1	N/A
STAMBPL1	ENST00000371926.3	STAM binding protein-like 1	675	1	0	0	1	0	hsa-miR-638	-0.01	-0.2	N/A
RTN2	ENST00000245923.4	reticulon 2	254	2	0	0	2	0	hsa-miR-638	-0.01	-0.26	N/A
KCTD16	ENST00000507359.3	potassium channel tetramerization domain containing 16	36	1	0	0	1	2	hsa-miR-638	-0.01	-0.05	N/A
PRPF40A	ENST00000410080.1	PRP40 pre-mRNA processing factor 40 homolog A (S. cerevisiae)	459	1	0	0	1	0	hsa-miR-638	-0.01	-0.07	N/A
OXA1L	ENST00000285848.5	oxidase (cytochrome c) assembly 1-like	317	1	0	0	1	0	hsa-miR-638	-0.01	-0.31	N/A
NUP62CL	ENST00000372461.3	nucleoporin 62kDa C-terminal like	73	1	0	0	1	0	hsa-miR-638	-0.01	-0.18	N/A
HOXD9	ENST00000249499.6	homeobox D9	78	1	0	0	1	0	hsa-miR-638	-0.01	-0.1	N/A
PCSK9	ENST00000302118.5	proprotein convertase subtilisin/kexin type 9	2345	1	0	0	1	0	hsa-miR-638	-0.01	-0.11	N/A
BAMBI	ENST00000375533.3	BMP and activin membrane-bound inhibitor	515	2	0	0	2	0	hsa-miR-638	-0.01	-0.32	N/A
ABCG2	ENST00000515655.1	ATP-binding cassette, sub-family G (WHITE), member 2	20	1	0	0	1	0	hsa-miR-638	-0.01	-0.12	N/A
GTPBP4	ENST00000360803.4	GTP binding protein 4	739	1	0	0	1	0	hsa-miR-638	-0.01	-0.16	N/A
TRMT5	ENST00000261249.6	tRNA methyltransferase 5	192	1	0	0	1	0	hsa-miR-638	-0.01	-0.12	N/A
UCHL5	ENST00000367455.4	ubiquitin carboxyl-terminal hydrolase L5	1150	1	0	0	1	0	hsa-miR-638	-0.01	-0.14	N/A
ZC3H15	ENST00000337859.6	zinc finger CCCH-type containing 15	395	1	0	0	1	0	hsa-miR-638	-0.01	-0.2	N/A
FUT11	ENST00000394790.1	fucosyltransferase 11 (alpha (1,3) fucosyltransferase)	622	1	0	0	1	0	hsa-miR-638	-0.01	-0.01	N/A
CCT4	ENST00000394440.3	chaperonin containing TCP1, subunit 4 (delta)	153	1	0	0	1	0	hsa-miR-638	-0.01	-0.17	N/A
ZC3H14	ENST00000251038.5	zinc finger CCCH-type containing 14	395	1	0	0	1	0	hsa-miR-638	-0.01	-0.1	N/A
PYGO1	ENST00000302000.6	pygopus homolog 1 (Drosophila)	104	1	0	0	1	0	hsa-miR-638	-0.01	-0.17	N/A
ZNF189	ENST00000374861.3	zinc finger protein 189	202	1	0	0	1	0	hsa-miR-638	-0.01	-0.16	N/A
PHC3	ENST00000495893.2	polyhomeotic homolog 3 (Drosophila)	366	1	0	0	1	0	hsa-miR-638	-0.01	-0.03	N/A
SRM	ENST00000376957.2	spermidine synthase	46	1	0	1	0	0	hsa-miR-638	-0.01	-0.08	N/A
NXN	ENST00000575801.1	nucleoredoxin	811	2	1	0	1	1	hsa-miR-638	-0.01	-0.48	N/A
N4BP1	ENST00000262384.3	NEDD4 binding protein 1	105	1	0	0	1	0	hsa-miR-638	-0.01	-0.01	N/A
LEPROTL1	ENST00000321250.8	leptin receptor overlapping transcript-like 1	1242	1	0	0	1	0	hsa-miR-638	-0.01	-0.2	N/A
KIAA0391	ENST00000534898.4	KIAA0391	822	1	0	1	0	0	hsa-miR-638	-0.01	-0.13	N/A
LRR1	ENST00000318317.4	leucine rich repeat protein 1	201	1	0	0	1	0	hsa-miR-638	-0.01	-0.33	N/A
ADH5	ENST00000296412.8	alcohol dehydrogenase 5 (class III), chi polypeptide	217	1	0	0	1	0	hsa-miR-638	-0.01	-0.08	N/A
BPTF	ENST00000321892.4	bromodomain PHD finger transcription factor	7	1	1	0	0	0	hsa-miR-638	-0.01	-0.03	N/A
EMP1	ENST00000256951.5	epithelial membrane protein 1	814	1	0	0	1	0	hsa-miR-638	-0.01	-0.17	N/A
ANKLE2	ENST00000539605.1	ankyrin repeat and LEM domain containing 2	504	1	0	0	1	0	hsa-miR-638	-0.01	-0.22	N/A
UQCC1	ENST00000349714.5	ubiquinol-cytochrome c reductase complex assembly factor 1	500	1	0	0	1	0	hsa-miR-638	-0.01	-0.19	N/A
C9orf114	ENST00000361256.5	chromosome 9 open reading frame 114	488	1	0	0	1	0	hsa-miR-638	-0.01	-0.27	N/A
ISCA2	ENST00000554924.1	iron-sulfur cluster assembly 2	135	1	0	0	1	1	hsa-miR-638	-0.01	-0.2	N/A
SEMA7A	ENST00000261918.4	semaphorin 7A, GPI membrane anchor (John Milton Hagen blood group)	65	1	0	0	1	0	hsa-miR-638	-0.01	-0.09	N/A
LIMCH1	ENST00000313860.7	LIM and calponin homology domains 1	1058	1	0	0	1	0	hsa-miR-638	-0.01	-0.14	N/A
TFDP2	ENST00000499676.2	transcription factor Dp-2 (E2F dimerization partner 2)	128	1	0	0	1	1	hsa-miR-638	-0.01	-0.06	N/A
ZNF148	ENST00000360647.4	zinc finger protein 148	230	1	0	0	1	1	hsa-miR-638	-0.01	-0.13	N/A
RNASEH2B	ENST00000336617.3	ribonuclease H2, subunit B	131	1	0	0	1	0	hsa-miR-638	-0.01	-0.14	N/A
ANG	ENST00000336811.6	angiogenin, ribonuclease, RNase A family, 5	1279	1	0	0	1	0	hsa-miR-638	-0.01	-0.26	N/A
TMEM120B	ENST00000449592.2	transmembrane protein 120B	60	1	0	0	1	2	hsa-miR-638	-0.01	-0.07	N/A
POLR3K	ENST00000293860.5	polymerase (RNA) III (DNA directed) polypeptide K, 12.3 kDa	477	1	0	0	1	0	hsa-miR-638	-0.01	-0.33	N/A
ANTXR2	ENST00000403729.2	anthrax toxin receptor 2	51	1	0	0	1	0	hsa-miR-638	-0.01	-0.06	N/A
SAR1B	ENST00000402673.2	SAR1 homolog B (S. cerevisiae)	1404	1	0	0	1	0	hsa-miR-638	-0.01	-0.18	N/A
DNTTIP2	ENST00000436063.2	deoxynucleotidyltransferase, terminal, interacting protein 2	599	3	0	0	3	0	hsa-miR-638	-0.01	-0.6	N/A
NDUFS1	ENST00000233190.6	NADH dehydrogenase (ubiquinone) Fe-S protein 1, 75kDa (NADH-coenzyme Q reductase)	1041	1	0	0	1	0	hsa-miR-638	-0.01	-0.04	N/A
FKBP9	ENST00000242209.4	FK506 binding protein 9, 63 kDa	43	1	0	0	1	0	hsa-miR-638	-0.01	-0.02	N/A
PLAGL2	ENST00000246229.4	pleiomorphic adenoma gene-like 2	254	1	0	0	1	0	hsa-miR-638	-0.01	-0.05	N/A
FADS1	ENST00000350997.7	fatty acid desaturase 1	1170	1	0	0	1	1	hsa-miR-638	-0.01	-0.17	N/A
PYCRL	ENST00000220966.6	pyrroline-5-carboxylate reductase-like	656	1	0	0	1	0	hsa-miR-638	-0.01	-0.12	N/A
NSUN4	ENST00000474844.1	NOP2/Sun domain family, member 4	422	1	0	0	1	0	hsa-miR-638	-0.01	-0.1	N/A
HSD17B12	ENST00000278353.4	hydroxysteroid (17-beta) dehydrogenase 12	1422	1	0	0	1	1	hsa-miR-638	-0.01	-0.05	N/A
MMP16	ENST00000286614.6	matrix metallopeptidase 16 (membrane-inserted)	12	1	0	0	1	0	hsa-miR-638	-0.01	-0.01	N/A
MSX2	ENST00000239243.6	msh homeobox 2	316	1	0	0	1	2	hsa-miR-638	-0.01	-0.26	N/A
MRGPRF	ENST00000441623.1	MAS-related GPR, member F	140	1	0	0	1	2	hsa-miR-638	-0.01	-0.16	N/A
LMOD1	ENST00000367288.4	leiomodin 1 (smooth muscle)	148	1	0	0	1	0	hsa-miR-638	-0.01	-0.15	N/A
EMC10	ENST00000376918.3	ER membrane protein complex subunit 10	1981	1	0	0	1	0	hsa-miR-638	0	-0.15	N/A
ITGA11	ENST00000423218.2	integrin, alpha 11	390	1	0	0	1	0	hsa-miR-638	0	-0.17	N/A
WDR53	ENST00000332629.5	WD repeat domain 53	173	1	0	0	1	0	hsa-miR-638	0	-0.15	N/A
CCNG2	ENST00000316355.5	cyclin G2	1056	1	1	0	0	1	hsa-miR-638	0	-0.41	N/A
ANGEL1	ENST00000251089.2	angel homolog 1 (Drosophila)	299	1	0	1	0	0	hsa-miR-638	0	-0.13	N/A
C2orf72	ENST00000373640.4	chromosome 2 open reading frame 72	3885	1	0	0	1	2	hsa-miR-638	0	-0.15	N/A
FAM69B	ENST00000371692.4	family with sequence similarity 69, member B	1836	1	0	0	1	0	hsa-miR-638	0	-0.17	N/A
SEC31B	ENST00000370345.3	SEC31 homolog B (S. cerevisiae)	43	1	0	0	1	0	hsa-miR-638	0	-0.13	N/A
MRPL19	ENST00000393909.2	mitochondrial ribosomal protein L19	816	1	0	1	0	0	hsa-miR-638	0	-0.2	N/A
BCL9L	ENST00000334801.3	B-cell CLL/lymphoma 9-like	91	1	0	0	1	0	hsa-miR-638	0	-0.08	N/A
TCIRG1	ENST00000265686.3	T-cell, immune regulator 1, ATPase, H+ transporting, lysosomal V0 subunit A3	2756	1	0	0	1	1	hsa-miR-638	0	-0.1	N/A
DUSP10	ENST00000366899.3	dual specificity phosphatase 10	70	1	0	0	1	0	hsa-miR-638	0	-0.14	N/A
ARHGAP20	ENST00000260283.4	Rho GTPase activating protein 20	85	1	0	0	1	0	hsa-miR-638	0	-0.13	N/A
SERPING1	ENST00000278407.4	serpin peptidase inhibitor, clade G (C1 inhibitor), member 1	1856	1	1	0	0	0	hsa-miR-638	0	-0.35	N/A
ZNF526	ENST00000301215.3	zinc finger protein 526	256	2	0	0	2	0	hsa-miR-638	0	-0.22	N/A
ERCC6L	ENST00000373657.1	excision repair cross-complementing rodent repair deficiency, complementation group 6-like	82	1	0	0	1	0	hsa-miR-638	0	-0.06	N/A
ELAVL1	ENST00000407627.2	ELAV like RNA binding protein 1	2812	1	0	0	1	1	hsa-miR-638	0	-0.11	N/A
HNRNPA3	ENST00000411529.2	heterogeneous nuclear ribonucleoprotein A3	329	1	0	0	1	0	hsa-miR-638	0	-0.12	N/A
MRPS15	ENST00000373116.5	mitochondrial ribosomal protein S15	1476	1	0	0	1	0	hsa-miR-638	0	-0.25	N/A
TMBIM4	ENST00000398033.4	transmembrane BAX inhibitor motif containing 4	1749	1	0	0	1	0	hsa-miR-638	0	-0.15	N/A
HMGB2	ENST00000296503.5	high mobility group box 2	8626	1	1	0	0	0	hsa-miR-638	0	-0.31	N/A
HNRNPR	ENST00000478691.1	heterogeneous nuclear ribonucleoprotein R	6629	1	0	0	1	0	hsa-miR-638	0	-0.09	N/A
MTHFR	ENST00000376592.1	methylenetetrahydrofolate reductase (NAD(P)H)	207	1	0	0	1	0	hsa-miR-638	0	-0.16	N/A
KIAA1715	ENST00000272748.4	KIAA1715	858	1	0	0	1	3	hsa-miR-638	0	-0.17	N/A
ATG5	ENST00000360666.4	autophagy related 5	1078	1	0	0	1	0	hsa-miR-638	0	-0.29	N/A
FARSB	ENST00000281828.6	phenylalanyl-tRNA synthetase, beta subunit	1883	2	0	0	2	0	hsa-miR-638	0	-0.39	N/A
DCTN6	ENST00000221114.3	dynactin 6	745	1	0	0	1	0	hsa-miR-638	0	-0.15	N/A
RBFA	ENST00000262197.7	ribosome binding factor A (putative)	131	1	0	0	1	0	hsa-miR-638	0	-0.09	N/A
RRAGD	ENST00000369415.4	Ras-related GTP binding D	644	1	0	0	1	1	hsa-miR-638	0	-0.08	N/A
ACO1	ENST00000309951.6	aconitase 1, soluble	738	1	0	0	1	0	hsa-miR-638	0	-0.13	N/A
RFC2	ENST00000352131.3	replication factor C (activator 1) 2, 40kDa	411	1	0	0	1	0	hsa-miR-638	0	-0.15	N/A
BCAS4	ENST00000371608.2	breast carcinoma amplified sequence 4	492	1	0	0	1	0	hsa-miR-638	0	-0.1	N/A
OGFRL1	ENST00000370435.4	opioid growth factor receptor-like 1	607	1	0	0	1	0	hsa-miR-638	0	-0.13	N/A
SNRPB2	ENST00000377943.5	small nuclear ribonucleoprotein polypeptide B	593	1	0	0	1	0	hsa-miR-638	0	-0.24	N/A
ARHGEF1	ENST00000347545.4	Rho guanine nucleotide exchange factor (GEF) 1	392	1	0	1	0	0	hsa-miR-638	0	-0.24	N/A
TMED4	ENST00000457408.2	transmembrane emp24 protein transport domain containing 4	3117	1	0	0	1	1	hsa-miR-638	0	-0.16	N/A
CTNNBL1	ENST00000361383.6	catenin, beta like 1	206	1	0	0	1	0	hsa-miR-638	0	-0.17	N/A
C22orf39	ENST00000399562.4	chromosome 22 open reading frame 39	360	2	0	0	2	0	hsa-miR-638	0	-0.24	N/A
TRIOBP	ENST00000406386.3	TRIO and F-actin binding protein	1545	1	0	0	1	0	hsa-miR-638	0	-0.2	N/A
CLCC1	ENST00000356970.2	chloride channel CLIC-like 1	849	1	0	0	1	2	hsa-miR-638	0	-0.25	N/A
SEPHS1	ENST00000545675.1	selenophosphate synthetase 1	281	1	0	0	1	0	hsa-miR-638	0	-0.17	N/A
LARGE	ENST00000354992.2	like-glycosyltransferase	411	1	0	0	1	0	hsa-miR-638	0	-0.16	N/A
KCNMB4	ENST00000258111.4	potassium large conductance calcium-activated channel, subfamily M, beta member 4	486	1	0	1	0	1	hsa-miR-638	0	-0.15	N/A
BMPR1A	ENST00000372037.3	bone morphogenetic protein receptor, type IA	125	1	0	0	1	0	hsa-miR-638	0	-0.01	N/A
ZNF226	ENST00000588883.1	zinc finger protein 226	327	1	0	0	1	0	hsa-miR-638	0	-0.1	N/A
ZNF354B	ENST00000322434.3	zinc finger protein 354B	52	1	0	0	1	1	hsa-miR-638	0	-0.05	N/A
HTT	ENST00000355072.5	huntingtin	731	1	0	0	1	0	hsa-miR-638	0	-0.07	N/A
MYLK	ENST00000360772.3	myosin light chain kinase	2964	1	0	1	0	0	hsa-miR-638	0	-0.1	N/A
GTPBP8	ENST00000383677.3	GTP-binding protein 8 (putative)	326	1	0	0	1	2	hsa-miR-638	0	-0.11	N/A
RP11-706O15.1	ENST00000425492.2	HCG1981372, isoform CRA_c; Uncharacterized protein	142	1	0	0	1	0	hsa-miR-638	0	-0.27	N/A
OTUD7B	ENST00000369135.4	OTU domain containing 7B	299	1	0	1	0	0	hsa-miR-638	0	-0.02	N/A
DAK	ENST00000394900.3	dihydroxyacetone kinase 2 homolog (S. cerevisiae)	242	1	0	0	1	1	hsa-miR-638	0	-0.11	N/A
EMILIN2	ENST00000254528.3	elastin microfibril interfacer 2	272	1	0	0	1	1	hsa-miR-638	0	-0.14	N/A
FTO	ENST00000471389.1	fat mass and obesity associated	240	2	0	0	2	2	hsa-miR-638	0	-0.12	N/A
BCAS3	ENST00000589222.1	breast carcinoma amplified sequence 3	339	1	0	0	1	0	hsa-miR-638	0	-0.12	N/A
SLC44A1	ENST00000374720.3	solute carrier family 44 (choline transporter), member 1	407	1	0	0	1	0	hsa-miR-638	0	-0.05	N/A
CNKSR3	ENST00000607772.1	CNKSR family member 3	567	1	0	0	1	0	hsa-miR-638	0	-0.04	N/A
SERPINA4	ENST00000555095.1	serpin peptidase inhibitor, clade A (alpha-1 antiproteinase, antitrypsin), member 4	203	1	0	0	1	1	hsa-miR-638	0	-0.08	N/A
IBA57	ENST00000366711.3	IBA57, iron-sulfur cluster assembly homolog (S. cerevisiae)	66	1	0	0	1	0	hsa-miR-638	0	-0.01	N/A
SNAP47	ENST00000366760.1	synaptosomal-associated protein, 47kDa	7416	1	0	0	1	0	hsa-miR-638	0	-0.15	N/A
ZNF347	ENST00000334197.7	zinc finger protein 347	33	1	0	0	1	0	hsa-miR-638	0	-0.01	N/A
IWS1	ENST00000295321.4	IWS1 homolog (S. cerevisiae)	343	1	0	1	0	0	hsa-miR-638	0	-0.07	N/A
NCAPG2	ENST00000541468.1	non-SMC condensin II complex, subunit G2	752	1	0	0	1	0	hsa-miR-638	0	-0.07	N/A
BOD1	ENST00000311086.4	biorientation of chromosomes in cell division 1	1465	1	0	0	1	0	hsa-miR-638	0	-0.17	N/A
C1orf35	ENST00000272139.4	chromosome 1 open reading frame 35	32	1	0	0	1	0	hsa-miR-638	0	-0.09	N/A
UNKL	ENST00000389221.4	unkempt homolog (Drosophila)-like	308	1	0	0	1	0	hsa-miR-638	0	-0.03	N/A
C4orf32	ENST00000309733.5	chromosome 4 open reading frame 32	325	1	0	0	1	0	hsa-miR-638	0	-0.14	N/A
ASPSCR1	ENST00000306739.4	alveolar soft part sarcoma chromosome region, candidate 1	191	1	0	0	1	0	hsa-miR-638	0	-0.07	N/A
RP11-126K1.2	ENST00000447795.2	Uncharacterized protein	145	1	0	0	1	0	hsa-miR-638	0	-0.2	N/A
CNNM3	ENST00000377060.3	cyclin M3	934	1	0	0	1	0	hsa-miR-638	0	-0.22	N/A
FIG4	ENST00000230124.3	FIG4 homolog, SAC1 lipid phosphatase domain containing (S. cerevisiae)	138	1	0	0	1	0	hsa-miR-638	0	-0.11	N/A
TMEM184B	ENST00000361906.3	transmembrane protein 184B	1362	1	0	0	1	1	hsa-miR-638	0	-0.17	N/A
HSPA13	ENST00000285667.3	heat shock protein 70kDa family, member 13	2175	2	0	0	2	0	hsa-miR-638	0	-0.16	N/A
RPAP2	ENST00000610020.1	RNA polymerase II associated protein 2	222	1	0	0	1	0	hsa-miR-638	0	-0.06	N/A
CLYBL	ENST00000376355.3	citrate lyase beta like	108	1	0	1	0	0	hsa-miR-638	0	-0.04	N/A
C16orf72	ENST00000327827.7	chromosome 16 open reading frame 72	379	1	1	0	0	0	hsa-miR-638	0	-0.12	N/A
ASAP3	ENST00000495646.1	ArfGAP with SH3 domain, ankyrin repeat and PH domain 3	196	1	0	0	1	0	hsa-miR-638	0	-0.14	N/A
RRP8	ENST00000254605.6	ribosomal RNA processing 8, methyltransferase, homolog (yeast)	423	1	0	0	1	0	hsa-miR-638	0	-0.14	N/A
GLI4	ENST00000523522.1	GLI family zinc finger 4	231	1	0	0	1	0	hsa-miR-638	0	-0.13	N/A
PEX2	ENST00000357039.4	peroxisomal biogenesis factor 2	662	1	0	0	1	0	hsa-miR-638	0	-0.22	N/A
CAPZB	ENST00000375142.1	capping protein (actin filament) muscle Z-line, beta	545	4	1	2	1	0	hsa-miR-638	0	-0.71	N/A
ST5	ENST00000526757.1	suppression of tumorigenicity 5	139	1	0	0	1	0	hsa-miR-638	0	-0.14	N/A
ERLIN2	ENST00000276461.5	ER lipid raft associated 2	887	1	0	0	1	0	hsa-miR-638	0	-0.12	N/A
SPACA7	ENST00000283550.3	sperm acrosome associated 7	5	1	1	0	0	0	hsa-miR-638	0	-1.03	N/A
AIG1	ENST00000357847.4	androgen-induced 1	1226	1	0	0	1	0	hsa-miR-638	0	-0.23	N/A
PAK4	ENST00000599386.1	p21 protein (Cdc42/Rac)-activated kinase 4	130	1	0	0	1	0	hsa-miR-638	0	-0.04	N/A
GPBP1	ENST00000424459.3	GC-rich promoter binding protein 1	732	1	0	0	1	0	hsa-miR-638	0	-0.06	N/A
ARIH2	ENST00000356401.4	ariadne RBR E3 ubiquitin protein ligase 2	938	1	0	0	1	1	hsa-miR-638	0	-0.29	N/A
HMGN3	ENST00000275036.7	high mobility group nucleosomal binding domain 3	2124	1	0	0	1	0	hsa-miR-638	0	-0.23	N/A
MRPL3	ENST00000264995.3	mitochondrial ribosomal protein L3	943	1	0	0	1	2	hsa-miR-638	0	-0.12	N/A
C9orf64	ENST00000376344.3	chromosome 9 open reading frame 64	126	1	0	0	1	1	hsa-miR-638	0	-0.01	N/A
RAB32	ENST00000367495.3	RAB32, member RAS oncogene family	1894	1	0	0	1	1	hsa-miR-638	0	-0.18	N/A
C19orf10	ENST00000262947.3	chromosome 19 open reading frame 10	1263	1	0	0	1	1	hsa-miR-638	0	-0.27	N/A
ERP44	ENST00000262455.6	endoplasmic reticulum protein 44	1530	2	0	0	2	0	hsa-miR-638	0	-0.25	N/A
CNPPD1	ENST00000360507.5	cyclin Pas1/PHO80 domain containing 1	234	1	0	0	1	0	hsa-miR-638	0	-0.12	N/A
FKRP	ENST00000318584.5	fukutin related protein	989	1	0	0	1	1	hsa-miR-638	0	-0.06	N/A
PLGRKT	ENST00000223864.2	plasminogen receptor, C-terminal lysine transmembrane protein	821	2	0	0	2	0	hsa-miR-638	0	-0.26	N/A
WDR77	ENST00000235090.5	WD repeat domain 77	1214	1	0	0	1	0	hsa-miR-638	0	-0.2	N/A
DNAJC10	ENST00000264065.7	DnaJ (Hsp40) homolog, subfamily C, member 10	709	1	0	0	1	3	hsa-miR-638	0	-0.09	N/A
GPR137C	ENST00000321662.6	G protein-coupled receptor 137C	110	1	0	0	1	1	hsa-miR-638	0	-0.16	N/A
ALG14	ENST00000370205.5	ALG14, UDP-N-acetylglucosaminyltransferase subunit	572	1	0	0	1	0	hsa-miR-638	0	-0.13	N/A
NUP37	ENST00000552283.1	nucleoporin 37kDa	458	1	0	0	1	0	hsa-miR-638	0	-0.08	N/A
TMEM216	ENST00000334888.5	transmembrane protein 216	616	1	0	0	1	0	hsa-miR-638	0	-0.18	N/A
CMBL	ENST00000296658.3	carboxymethylenebutenolidase homolog (Pseudomonas)	2602	1	0	0	1	0	hsa-miR-638	0	-0.15	N/A
RABIF	ENST00000367262.3	RAB interacting factor	948	1	0	0	1	0	hsa-miR-638	0	-0.13	N/A
THOC5	ENST00000490103.1	THO complex 5	587	1	0	0	1	1	hsa-miR-638	0	-0.12	N/A
INO80	ENST00000361937.3	INO80 complex subunit	279	1	0	0	1	0	hsa-miR-638	0	-0.05	N/A
SCAF4	ENST00000286835.7	SR-related CTD-associated factor 4	506	1	0	0	1	0	hsa-miR-638	0	-0.14	N/A
SURF2	ENST00000371964.4	surfeit 2	290	1	0	0	1	0	hsa-miR-638	0	-0.19	N/A
ACTR3	ENST00000263238.2	ARP3 actin-related protein 3 homolog (yeast)	816	1	0	0	1	0	hsa-miR-638	0	-0.18	N/A
MXD4	ENST00000337190.2	MAX dimerization protein 4	1173	1	0	0	1	1	hsa-miR-638	0	-0.15	N/A
CADM1	ENST00000452722.3	cell adhesion molecule 1	676	1	0	0	1	1	hsa-miR-638	0	-0.14	N/A
ISY1	ENST00000393292.3	ISY1 splicing factor homolog (S. cerevisiae)	897	1	0	0	1	1	hsa-miR-638	0	-0.16	N/A
IGFBP4	ENST00000269593.4	insulin-like growth factor binding protein 4	4053	1	0	0	1	0	hsa-miR-638	0	-0.16	N/A
GALT	ENST00000378842.3	galactose-1-phosphate uridylyltransferase	1012	1	0	0	1	0	hsa-miR-638	0	-0.2	N/A
GLUL	ENST00000331872.6	glutamate-ammonia ligase	1073	1	0	0	1	0	hsa-miR-638	0	-0.12	N/A
TTC13	ENST00000366661.4	tetratricopeptide repeat domain 13	3928	1	0	0	1	1	hsa-miR-638	0	-0.18	N/A
ZZZ3	ENST00000370801.3	zinc finger, ZZ-type containing 3	338	1	0	0	1	0	hsa-miR-638	0	-0.2	N/A
RGS7BP	ENST00000334025.2	regulator of G-protein signaling 7 binding protein	5	2	0	1	1	0	hsa-miR-638	0	-0.44	N/A
BBIP1	ENST00000454061.1	BBSome interacting protein 1	772	1	0	0	1	0	hsa-miR-638	0	-0.22	N/A
PSMD1	ENST00000308696.6	proteasome (prosome, macropain) 26S subunit, non-ATPase, 1	1188	1	0	0	1	0	hsa-miR-638	0	-0.15	N/A
DUSP1	ENST00000239223.3	dual specificity phosphatase 1	37211	1	0	0	1	0	hsa-miR-638	0	-0.12	N/A
PAX1	ENST00000444366.2	paired box 1	5	2	0	1	1	0	hsa-miR-638	0	-0.37	N/A
TPD52	ENST00000379096.5	tumor protein D52	4585	1	0	0	1	1	hsa-miR-638	0	-0.15	N/A
GRSF1	ENST00000254799.6	G-rich RNA sequence binding factor 1	4414	1	0	0	1	0	hsa-miR-638	0	-0.08	N/A
CNBP	ENST00000502976.1	CCHC-type zinc finger, nucleic acid binding protein	2257	1	0	0	1	0	hsa-miR-638	0	-0.08	N/A
LETMD1	ENST00000380123.2	LETM1 domain containing 1	1619	1	0	0	1	0	hsa-miR-638	0	-0.2	N/A
RETSAT	ENST00000295802.4	retinol saturase (all-trans-retinol 13,14-reductase)	2045	1	0	0	1	0	hsa-miR-638	0	-0.13	N/A
WDR33	ENST00000322313.4	WD repeat domain 33	537	1	0	0	1	0	hsa-miR-638	0	-0.07	N/A
C14orf164	ENST00000399910.1	chromosome 14 open reading frame 164	5	1	0	0	1	1	hsa-miR-638	0	-0.32	N/A
TCEAL4	ENST00000472484.1	transcription elongation factor A (SII)-like 4	937	1	0	0	1	0	hsa-miR-638	0	-0.15	N/A
WHAMM	ENST00000286760.4	WAS protein homolog associated with actin, golgi membranes and microtubules	834	1	0	0	1	0	hsa-miR-638	0	-0.11	N/A
SLC39A2	ENST00000554422.1	solute carrier family 39 (zinc transporter), member 2	5	1	0	0	1	0	hsa-miR-638	0	-0.31	N/A
ACOT2	ENST00000538782.1	acyl-CoA thioesterase 2	5	2	0	0	2	0	hsa-miR-638	0	-0.25	N/A
AC005003.1	ENST00000504184.2	CDNA FLJ20464 fis, clone KAT06158; HCG1777549; Uncharacterized protein	5	2	0	0	2	0	hsa-miR-638	0	-0.27	N/A
METTL22	ENST00000381920.3	methyltransferase like 22	553	1	0	0	1	1	hsa-miR-638	0	-0.12	N/A
TTL	ENST00000233336.6	tubulin tyrosine ligase	442	1	0	0	1	0	hsa-miR-638	0	-0.01	N/A
LILRA1	ENST00000453777.1	leukocyte immunoglobulin-like receptor, subfamily A (with TM domain), member 1	5	1	1	0	0	0	hsa-miR-638	0	-0.27	N/A
DSN1	ENST00000426836.1	DSN1, MIS12 kinetochore complex component	350	1	0	0	1	1	hsa-miR-638	0	-0.12	N/A
MSH3	ENST00000265081.6	mutS homolog 3	443	1	0	0	1	0	hsa-miR-638	0	-0.07	N/A
MRPL11	ENST00000329819.4	mitochondrial ribosomal protein L11	8555	1	0	0	1	0	hsa-miR-638	0	-0.23	N/A
CCS	ENST00000533244.1	copper chaperone for superoxide dismutase	2980	2	0	0	2	0	hsa-miR-638	0	-0.19	N/A
HTR1A	ENST00000323865.3	5-hydroxytryptamine (serotonin) receptor 1A, G protein-coupled	5	1	0	0	1	0	hsa-miR-638	0	-0.28	N/A
ATG2A	ENST00000421419.2	autophagy related 2A	3795	1	0	0	1	2	hsa-miR-638	0	-0.17	N/A
C22orf23	ENST00000403305.1	chromosome 22 open reading frame 23	6	1	0	1	0	0	hsa-miR-638	0	-0.33	N/A
GSKIP	ENST00000555181.1	GSK3B interacting protein	1581	1	0	0	1	0	hsa-miR-638	0	-0.26	N/A
CLEC12B	ENST00000338896.5	C-type lectin domain family 12, member B	5	2	0	1	1	0	hsa-miR-638	0	-0.26	N/A
UPK1A	ENST00000379013.2	uroplakin 1A	5	1	0	0	1	0	hsa-miR-638	0	-0.29	N/A
SMOC1	ENST00000381280.4	SPARC related modular calcium binding 1	2743	1	0	0	1	0	hsa-miR-638	0	-0.14	N/A
TSC22D2	ENST00000361875.3	TSC22 domain family, member 2	1062	1	0	0	1	1	hsa-miR-638	0	-0.11	N/A
TCF3	ENST00000262965.5	transcription factor 3	1267	1	0	0	1	0	hsa-miR-638	0	-0.14	N/A
BNC2	ENST00000380672.4	basonuclin 2	770	1	0	0	1	1	hsa-miR-638	0	-0.02	N/A
ZFP62	ENST00000512132.1	ZFP62 zinc finger protein	170	1	0	0	1	0	hsa-miR-638	0	-0.03	N/A
GBP6	ENST00000370456.4	guanylate binding protein family, member 6	5	1	0	1	0	0	hsa-miR-638	0	-0.27	N/A
ZNF554	ENST00000317243.5	zinc finger protein 554	472	1	0	0	1	0	hsa-miR-638	0	-0.03	N/A
WDR88	ENST00000355868.3	WD repeat domain 88	5	1	0	1	0	0	hsa-miR-638	0	-0.3	N/A
PLGLB2	ENST00000359481.4	plasminogen-like B2	5	1	0	0	1	0	hsa-miR-638	0	-0.22	N/A
RNF126	ENST00000292363.5	ring finger protein 126	658	2	0	0	2	0	hsa-miR-638	0	-0.18	N/A
ACKR2	ENST00000442925.1	atypical chemokine receptor 2	5	1	0	0	1	1	hsa-miR-638	0	-0.19	N/A
LDLRAD1	ENST00000371362.3	low density lipoprotein receptor class A domain containing 1	5	1	0	0	1	0	hsa-miR-638	0	-0.21	N/A
C17orf72	ENST00000580752.1	chromosome 17 open reading frame 72	5	1	0	0	1	1	hsa-miR-638	0	-0.24	N/A
DCUN1D5	ENST00000260247.5	DCN1, defective in cullin neddylation 1, domain containing 5	1486	1	0	0	1	0	hsa-miR-638	0	-0.12	N/A
LDHA	ENST00000227157.4	lactate dehydrogenase A	375	1	0	0	1	1	hsa-miR-638	0	-0.17	N/A
PLGLB1	ENST00000355705.3	plasminogen-like B1	5	1	0	0	1	0	hsa-miR-638	0	-0.22	N/A
CCL24	ENST00000222902.2	chemokine (C-C motif) ligand 24	5	1	0	0	1	0	hsa-miR-638	0	-0.23	N/A
GRWD1	ENST00000253237.5	glutamate-rich WD repeat containing 1	2673	1	0	0	1	4	hsa-miR-638	0	-0.14	N/A
AIP	ENST00000279146.3	aryl hydrocarbon receptor interacting protein	2469	1	0	0	1	0	hsa-miR-638	0	-0.18	N/A
POTED	ENST00000299443.5	POTE ankyrin domain family, member D	5	1	0	0	1	0	hsa-miR-638	0	-0.14	N/A
SLC2A9	ENST00000264784.3	solute carrier family 2 (facilitated glucose transporter), member 9	5	1	0	0	1	0	hsa-miR-638	0	-0.14	N/A
PYCARD	ENST00000247470.9	PYD and CARD domain containing	15	1	1	0	0	0	hsa-miR-638	0	-0.5	N/A
BTN3A2	ENST00000396948.1	butyrophilin, subfamily 3, member A2	5	1	0	1	0	0	hsa-miR-638	0	-0.16	N/A
ABCB11	ENST00000263817.6	ATP-binding cassette, sub-family B (MDR/TAP), member 11	5	3	0	0	3	1	hsa-miR-638	0	-0.16	N/A
GABRR2	ENST00000402938.3	gamma-aminobutyric acid (GABA) A receptor, rho 2	5	1	0	0	1	0	hsa-miR-638	0	-0.14	N/A
LAIR1	ENST00000391743.3	leukocyte-associated immunoglobulin-like receptor 1	5	1	0	0	1	0	hsa-miR-638	0	-0.15	N/A
TP53BP2	ENST00000391878.2	tumor protein p53 binding protein, 2	1531	1	0	0	1	1	hsa-miR-638	0	-0.14	N/A
SIGLEC6	ENST00000346477.3	sialic acid binding Ig-like lectin 6	5	1	0	0	1	0	hsa-miR-638	0	-0.14	N/A
GSG1	ENST00000396302.3	germ cell associated 1	5	1	0	0	1	0	hsa-miR-638	0	-0.17	N/A
FAM69C	ENST00000400291.2	family with sequence similarity 69, member C	5	1	0	0	1	0	hsa-miR-638	0	-0.17	N/A
LUC7L3	ENST00000505658.1	LUC7-like 3 (S. cerevisiae)	2970	1	0	0	1	0	hsa-miR-638	0	-0.18	N/A
TMCO1	ENST00000392129.6	transmembrane and coiled-coil domains 1	4447	1	0	0	1	1	hsa-miR-638	0	-0.14	N/A
VCAN	ENST00000265077.3	versican	542	1	0	0	1	1	hsa-miR-638	0	-0.12	N/A
NLRP9	ENST00000332836.2	NLR family, pyrin domain containing 9	5	2	0	0	2	0	hsa-miR-638	0	-0.15	N/A
COL23A1	ENST00000390654.3	collagen, type XXIII, alpha 1	15	2	0	1	1	1	hsa-miR-638	0	-0.27	N/A
TCF23	ENST00000296096.5	transcription factor 23	5	1	0	0	1	0	hsa-miR-638	0	-0.12	N/A
WTIP	ENST00000590071.2	Wilms tumor 1 interacting protein	1303	1	0	0	1	0	hsa-miR-638	0	-0.05	N/A
MX2	ENST00000330714.3	myxovirus (influenza virus) resistance 2 (mouse)	7	1	0	0	1	1	hsa-miR-638	0	-0.13	N/A
CTNNA2	ENST00000496558.1	catenin (cadherin-associated protein), alpha 2	5	1	0	0	1	0	hsa-miR-638	0	-0.11	N/A
KLHDC8A	ENST00000367155.3	kelch domain containing 8A	8	1	0	0	1	1	hsa-miR-638	0	-0.17	N/A
METTL24	ENST00000338882.4	methyltransferase like 24	5	1	0	0	1	0	hsa-miR-638	0	-0.12	N/A
AQP1	ENST00000509504.1	Uncharacterized protein	5	1	0	0	1	0	hsa-miR-638	0	-0.08	N/A
TOR1AIP1	ENST00000606911.2	torsin A interacting protein 1	3069	1	0	0	1	0	hsa-miR-638	0	-0.15	N/A
SGSM2	ENST00000426855.2	small G protein signaling modulator 2	381	1	0	0	1	0	hsa-miR-638	0	-0.04	N/A
FZD8	ENST00000374694.1	frizzled family receptor 8	791	1	0	0	1	0	hsa-miR-638	0	-0.12	N/A
HSPA14	ENST00000378372.3	heat shock 70kDa protein 14	1017	1	0	0	1	0	hsa-miR-638	0	-0.14	N/A
TUBB6	ENST00000591208.1	tubulin, beta 6 class V	5820	2	0	1	1	0	hsa-miR-638	0	-0.49	N/A
EBF4	ENST00000380648.4	early B-cell factor 4	1194	1	0	0	1	0	hsa-miR-638	0	-0.13	N/A
SLC16A3	ENST00000581287.1	solute carrier family 16 (monocarboxylate transporter), member 3	16333	1	0	0	1	2	hsa-miR-638	0	-0.1	N/A
TMEM179	ENST00000556573.1	transmembrane protein 179	5	1	0	0	1	0	hsa-miR-638	0	-0.11	N/A
GRIN2A	ENST00000562109.1	glutamate receptor, ionotropic, N-methyl D-aspartate 2A	5	1	0	0	1	1	hsa-miR-638	0	-0.09	N/A
ANGPT4	ENST00000381922.3	angiopoietin 4	5	1	0	1	0	0	hsa-miR-638	0	-0.11	N/A
ATP1A2	ENST00000361216.3	ATPase, Na+/K+ transporting, alpha 2 polypeptide	5	1	0	0	1	0	hsa-miR-638	0	-0.13	N/A
NFAM1	ENST00000329021.5	NFAT activating protein with ITAM motif 1	7	1	0	0	1	0	hsa-miR-638	0	-0.15	N/A
MGAT4C	ENST00000604798.1	mannosyl (alpha-1,3-)-glycoprotein beta-1,4-N-acetylglucosaminyltransferase, isozyme C (putative)	5	1	0	0	1	0	hsa-miR-638	0	-0.1	N/A
C6orf25	ENST00000375810.4	chromosome 6 open reading frame 25	5	1	0	0	1	0	hsa-miR-638	0	-0.11	N/A
SLC22A1	ENST00000366963.4	solute carrier family 22 (organic cation transporter), member 1	7	1	0	0	1	0	hsa-miR-638	0	-0.11	N/A
CD3D	ENST00000300692.4	CD3d molecule, delta (CD3-TCR complex)	8	1	0	0	1	0	hsa-miR-638	0	-0.14	N/A
ABCA6	ENST00000284425.2	ATP-binding cassette, sub-family A (ABC1), member 6	7	1	0	0	1	0	hsa-miR-638	0	-0.12	N/A
NUP188	ENST00000372577.2	nucleoporin 188kDa	3481	1	0	1	0	0	hsa-miR-638	0	-0.18	N/A
FHL5	ENST00000541107.1	four and a half LIM domains 5	5	1	0	0	1	1	hsa-miR-638	0	-0.06	N/A
ENPP5	ENST00000371383.2	ectonucleotide pyrophosphatase/phosphodiesterase 5 (putative)	15	1	0	0	1	0	hsa-miR-638	0	-0.09	N/A
ITGB1BP1	ENST00000360635.3	integrin beta 1 binding protein 1	14310	1	0	0	1	0	hsa-miR-638	0	-0.22	N/A
CACNA1A	ENST00000573710.2	calcium channel, voltage-dependent, P/Q type, alpha 1A subunit	5	1	0	1	0	0	hsa-miR-638	0	-0.06	N/A
SAA1	ENST00000405158.2	serum amyloid A1	48	2	0	0	2	0	hsa-miR-638	0	-0.54	N/A
NCKAP1	ENST00000361354.4	NCK-associated protein 1	700	1	0	0	1	0	hsa-miR-638	0	-0.01	N/A
AC135178.1	ENST00000535173.1	HCG1985372; Uncharacterized protein; cDNA FLJ37541 fis, clone BRCAN2026340	13	1	0	0	1	0	hsa-miR-638	0	-0.19	N/A
HEYL	ENST00000372852.3	hairy/enhancer-of-split related with YRPW motif-like	37	4	0	0	4	1	hsa-miR-638	0	-0.38	N/A
SH3TC2	ENST00000502274.1	SH3 domain and tetratricopeptide repeats 2	31	3	0	0	3	2	hsa-miR-638	0	-0.26	N/A
SHC3	ENST00000375835.4	SHC (Src homology 2 domain containing) transforming protein 3	18	2	0	0	2	1	hsa-miR-638	0	-0.11	N/A
ZNF652	ENST00000362063.2	zinc finger protein 652	33	1	0	0	1	2	hsa-miR-638	0	-0.18	N/A
BLOC1S4	ENST00000320776.3	biogenesis of lysosomal organelles complex-1, subunit 4, cappuccino	2383	1	0	1	0	0	hsa-miR-638	0	-0.17	N/A
ZNF215	ENST00000414517.2	zinc finger protein 215	24	1	0	0	1	0	hsa-miR-638	0	-0.18	N/A
MED29	ENST00000315588.5	mediator complex subunit 29	2453	1	0	0	1	0	hsa-miR-638	0	-0.12	N/A
UQCR11	ENST00000589880.1	ubiquinol-cytochrome c reductase, complex III subunit XI	34490	1	0	0	1	0	hsa-miR-638	0	-0.19	N/A
TRA2B	ENST00000453386.2	transformer 2 beta homolog (Drosophila)	1868	1	0	0	1	0	hsa-miR-638	0	-0.07	N/A
TSC22D1	ENST00000458659.2	TSC22 domain family, member 1	4146	1	0	0	1	1	hsa-miR-638	0	-0.11	N/A
WDR12	ENST00000261015.4	WD repeat domain 12	444	1	0	0	1	0	hsa-miR-638	0	-0.14	N/A
FTL	ENST00000331825.6	ferritin, light polypeptide	9158	1	0	0	1	0	hsa-miR-638	0	-0.27	N/A
MCTS1	ENST00000371317.5	malignant T cell amplified sequence 1	6611	1	0	0	1	0	hsa-miR-638	0	-0.09	N/A
C1S	ENST00000406697.1	complement component 1, s subcomponent	707	1	0	0	1	0	hsa-miR-638	0	-0.17	N/A
NDNF	ENST00000379692.4	neuron-derived neurotrophic factor	51	2	0	0	2	0	hsa-miR-638	0	-0.19	N/A
DNAH17	ENST00000585328.1	dynein, axonemal, heavy chain 17	20	1	0	0	1	0	hsa-miR-638	0	-0.05	N/A
FRMD4A	ENST00000358621.4	FERM domain containing 4A	192	1	0	0	1	0	hsa-miR-638	0	-0.27	N/A
C16orf45	ENST00000300006.4	chromosome 16 open reading frame 45	60	1	0	0	1	0	hsa-miR-638	0	-0.07	N/A
SNX21	ENST00000462307.1	sorting nexin family member 21	343	1	1	0	0	0	hsa-miR-638	0	-0.44	N/A
LRRC40	ENST00000370952.3	leucine rich repeat containing 40	88	1	0	0	1	1	hsa-miR-638	0	-0.1	N/A
RLIM	ENST00000332687.6	ring finger protein, LIM domain interacting	662	1	0	0	1	0	hsa-miR-638	0	-0.1	N/A
GHR	ENST00000230882.4	growth hormone receptor	102	1	0	0	1	1	hsa-miR-638	0	-0.16	N/A
TNFAIP8L3	ENST00000327536.5	tumor necrosis factor, alpha-induced protein 8-like 3	259	1	0	0	1	0	hsa-miR-638	0	-0.15	N/A
ZBTB20	ENST00000462705.1	zinc finger and BTB domain containing 20	5	1	0	1	0	1	hsa-miR-638	0	-0.02	N/A
WDR75	ENST00000314761.4	WD repeat domain 75	174	1	0	0	1	2	hsa-miR-638	0	-0.14	N/A
ZNF8	ENST00000608843.1	zinc finger protein 8	24	1	0	0	1	1	hsa-miR-638	0	-0.1	N/A
NQO2	ENST00000338130.2	NAD(P)H dehydrogenase, quinone 2	62	1	0	0	1	1	hsa-miR-638	0	-0.24	N/A
ASAP1	ENST00000357668.1	ArfGAP with SH3 domain, ankyrin repeat and PH domain 1	185	1	0	0	1	0	hsa-miR-638	0	-0.28	N/A
SRD5A1	ENST00000274192.5	steroid-5-alpha-reductase, alpha polypeptide 1 (3-oxo-5 alpha-steroid delta 4-dehydrogenase alpha 1)	2684	1	0	0	1	0	hsa-miR-638	0	-0.19	N/A
CACNA1C	ENST00000399655.1	calcium channel, voltage-dependent, L type, alpha 1C subunit	69	1	0	0	1	2	hsa-miR-638	0	-0.02	N/A
NUP93	ENST00000542526.1	nucleoporin 93kDa	1604	1	0	0	1	1	hsa-miR-638	0	-0.07	N/A
SNAP25	ENST00000254976.2	synaptosomal-associated protein, 25kDa	54	1	0	0	1	0	hsa-miR-638	0	-0.17	N/A
TUFM	ENST00000313511.3	Tu translation elongation factor, mitochondrial	41584	1	0	0	1	0	hsa-miR-638	0	-0.22	N/A
KLF2	ENST00000248071.5	Kruppel-like factor 2 (lung)	431	1	0	0	1	1	hsa-miR-638	0	-0.13	N/A
DNAJC30	ENST00000395176.2	DnaJ (Hsp40) homolog, subfamily C, member 30	766	1	0	0	1	0	hsa-miR-638	0	-0.18	N/A
GOLM1	ENST00000388712.3	golgi membrane protein 1	4212	1	0	0	1	0	hsa-miR-638	0	-0.14	N/A
ZNF140	ENST00000355557.2	zinc finger protein 140	137	2	0	0	2	0	hsa-miR-638	0	-0.3	N/A
DNAJB4	ENST00000370763.5	DnaJ (Hsp40) homolog, subfamily B, member 4	633	1	0	0	1	0	hsa-miR-638	0	-0.15	N/A
KCNK6	ENST00000263372.3	potassium channel, subfamily K, member 6	137	2	0	0	2	1	hsa-miR-638	0	-0.15	N/A
C18orf32	ENST00000579820.1	chromosome 18 open reading frame 32	733	1	0	0	1	0	hsa-miR-638	0	-0.16	N/A
HSPA1B	ENST00000375650.3	heat shock 70kDa protein 1B	488	1	0	1	0	0	hsa-miR-638	0	-0.16	N/A
ECHDC1	ENST00000528402.1	enoyl CoA hydratase domain containing 1	457	1	0	0	1	0	hsa-miR-638	0	-0.27	N/A
LAMA4	ENST00000230538.7	laminin, alpha 4	605	1	0	0	1	0	hsa-miR-638	0	-0.14	N/A
GPI	ENST00000415930.3	glucose-6-phosphate isomerase	8230	1	0	0	1	0	hsa-miR-638	0	-0.13	N/A
FAM207A	ENST00000291634.6	family with sequence similarity 207, member A	399	1	0	0	1	0	hsa-miR-638	0	-0.15	N/A
VEGFB	ENST00000309422.2	vascular endothelial growth factor B	4432	1	0	0	1	0	hsa-miR-638	0	-0.28	N/A
QSOX1	ENST00000367602.3	quiescin Q6 sulfhydryl oxidase 1	9246	1	0	0	1	0	hsa-miR-638	0	-0.08	N/A
RPS24	ENST00000435275.1	ribosomal protein S24	39029	1	1	0	0	0	hsa-miR-638	0	-0.44	N/A
BLVRA	ENST00000402924.1	biliverdin reductase A	144	1	0	0	1	0	hsa-miR-638	0	-0.2	N/A
PKIA	ENST00000396418.2	protein kinase (cAMP-dependent, catalytic) inhibitor alpha	542	1	0	0	1	0	hsa-miR-638	0	-0.09	N/A

## Sheet: Table S6
Table S6. Top 128 upregulated mRNAs in GSE19188 (filtration citeria, p value < 0.05 and LogFC ≥ 2)
ID	adj.P.Val	P.Value	t	B	logFC	Gene.symbol	Gene.title
223229_at	8.43e-29	1.4e-31	15.6337	61.2586	2.8	UBE2T	ubiquitin conjugating enzyme E2 T
204641_at	9.22e-26	3.79e-28	14.1973	53.4425	2.88	NEK2	NIMA related kinase 2
201291_s_at	2.21e-25	9.85e-28	14.0263	52.4985	3.89	TOP2A	topoisomerase (DNA) II alpha
225655_at	4.66e-25	2.23e-27	13.8799	51.6878	2.59	UHRF1	ubiquitin like with PHD and ring finger domains 1
218355_at	6.66e-25	3.31e-27	13.8096	51.2984	2.67	KIF4A	kinesin family member 4A
202954_at	1.48e-24	7.82e-27	13.6564	50.4476	2.95	UBE2C	ubiquitin conjugating enzyme E2 C
218726_at	2.42e-24	1.35e-26	13.5599	49.9104	2.2	HJURP	Holliday junction recognition protein
37892_at	2.43e-24	1.35e-26	13.5589	49.9052	4.24	COL11A1	collagen type XI alpha 1 chain
201292_at	3.06e-24	1.75e-26	13.513	49.6494	3.42	TOP2A	topoisomerase (DNA) II alpha
221521_s_at	3.42e-24	1.98e-26	13.4917	49.5306	2.23	GINS2	GINS complex subunit 2
210052_s_at	3.65e-24	2.16e-26	13.4762	49.4444	3.04	TPX2	TPX2, microtubule nucleation factor
202870_s_at	9.45e-24	6.09e-26	13.292	48.4163	3.02	CDC20	cell division cycle 20
209408_at	1.6e-23	1.1e-25	13.1878	47.8342	2.48	KIF2C	kinesin family member 2C
214710_s_at	2.05e-23	1.47e-25	13.1358	47.5432	2.85	CCNB1	cyclin B1
202705_at	2.26e-23	1.63e-25	13.1173	47.4394	2.67	CCNB2	cyclin B2
207828_s_at	2.59e-23	1.92e-25	13.0886	47.2787	2.71	CENPF	centromere protein F
222608_s_at	2.6e-23	1.94e-25	13.087	47.2696	3.25	ANLN	anillin actin binding protein
206102_at	3.3e-23	2.53e-25	13.0401	47.0072	2.86	GINS1	GINS complex subunit 1
203744_at	3.92e-23	3.03e-25	13.0081	46.8275	2.63	HMGB3	high mobility group box 3
209875_s_at	5.76e-23	4.7e-25	12.9308	46.3942	3.8	SPP1	secreted phosphoprotein 1
204320_at	6.19e-23	5.11e-25	12.9162	46.3122	3.78	COL11A1	collagen type XI alpha 1 chain
223381_at	8.46e-23	7.2e-25	12.8555	45.9713	2.81	NUF2	NUF2, NDC80 kinetochore complex component
204675_at	1.04e-22	9.02e-25	12.8158	45.7484	2.06	SRD5A1	steroid 5 alpha-reductase 1
203764_at	1.31e-22	1.17e-24	12.7693	45.4872	3.05	DLGAP5	DLG associated protein 5
204825_at	1.32e-22	1.18e-24	12.7683	45.4813	2.65	MELK	maternal embryonic leucine zipper kinase
203362_s_at	1.47e-22	1.33e-24	12.7471	45.3622	2.68	MAD2L1	MAD2 mitotic arrest deficient-like 1 (yeast)
218009_s_at	1.65e-22	1.52e-24	12.7244	45.2347	2.44	PRC1	protein regulator of cytokinesis 1
1555758_a_at	1.75e-22	1.62e-24	12.7129	45.1701	2.65	CDKN3	cyclin dependent kinase inhibitor 3
204092_s_at	1.93e-22	1.8e-24	12.6941	45.0643	2.13	AURKA	aurora kinase A
202503_s_at	2.13e-22	1.99e-24	12.6768	44.9667	2.72	KIAA0101	KIAA0101
202095_s_at	3.19e-22	3.09e-24	12.5994	44.5312	2.72	BIRC5	baculoviral IAP repeat containing 5
209714_s_at	3.46e-22	3.4e-24	12.5821	44.4339	2.52	CDKN3	cyclin dependent kinase inhibitor 3
204962_s_at	7.68e-22	8.06e-24	12.4306	43.5804	2.58	SLC35F6///CENPA	solute carrier family 35 member F6///centromere protein A
206364_at	8.84e-22	9.43e-24	12.4031	43.4255	2.3	KIF14	kinesin family member 14
203755_at	9.85e-22	1.07e-23	12.3815	43.3036	2.61	BUB1B	BUB1 mitotic checkpoint serine/threonine kinase B
218469_at	1.04e-21	1.14e-23	12.3706	43.242	3.73	GREM1	gremlin 1, DAN family BMP antagonist
222036_s_at	1.18e-21	1.3e-23	12.3463	43.1048	2.04	MCM4	minichromosome maintenance complex component 4
212022_s_at	1.2e-21	1.33e-23	12.3434	43.0882	2.15	MKI67	marker of proliferation Ki-67
218542_at	1.32e-21	1.48e-23	12.3245	42.982	2.47	CEP55	centrosomal protein 55
208079_s_at	1.62e-21	1.83e-23	12.2869	42.7698	2.32	AURKA	aurora kinase A
228729_at	1.93e-21	2.24e-23	12.2514	42.5689	2.37	CCNB1	cyclin B1
222958_s_at	2.04e-21	2.38e-23	12.241	42.5102	2.41	DEPDC1	DEP domain containing 1
219918_s_at	2.43e-21	2.87e-23	12.2082	42.325	2.93	ASPM	abnormal spindle microtubule assembly
218662_s_at	2.52e-21	2.99e-23	12.201	42.2845	2.14	NCAPG	non-SMC condensin I complex subunit G
218782_s_at	3.04e-21	3.63e-23	12.1667	42.0906	2.18	ATAD2	ATPase family, AAA domain containing 2
223307_at	3.72e-21	4.53e-23	12.1278	41.8713	2.17	CDCA3	cell division cycle associated 3
201250_s_at	3.9e-21	4.79e-23	12.118	41.8158	2.14	SLC2A1	solute carrier family 2 member 1
209035_at	3.98e-21	4.9e-23	12.1142	41.7939	2.15	MDK	midkine (neurite growth-promoting factor 2)
212021_s_at	4.86e-21	6.08e-23	12.0765	41.5813	2.03	MKI67	marker of proliferation Ki-67
219978_s_at	5.33e-21	6.71e-23	12.0591	41.4828	2.38	NUSAP1	nucleolar and spindle associated protein 1
204026_s_at	5.41e-21	6.84e-23	12.0557	41.4637	2.21	ZWINT	ZW10 interacting kinetochore protein
229490_s_at	5.62e-21	7.12e-23	12.0488	41.4243	2.35
218468_s_at	6.49e-21	8.35e-23	12.0208	41.2662	3.53	GREM1	gremlin 1, DAN family BMP antagonist
225681_at	7.41e-21	9.67e-23	11.9951	41.1209	3.19	CTHRC1	collagen triple helix repeat containing 1
207165_at	1.04e-20	1.39e-22	11.9313	40.7601	2.39	HMMR	hyaluronan mediated motility receptor
203418_at	1.18e-20	1.6e-22	11.9067	40.6209	2.22	CCNA2	cyclin A2
223062_s_at	2.13e-20	3.12e-22	11.7902	39.9614	2.77	PSAT1	phosphoserine aminotransferase 1
204822_at	2.34e-20	3.47e-22	11.7719	39.858	2.9	TTK	TTK protein kinase
218039_at	2.66e-20	3.98e-22	11.7476	39.7205	2.41	NUSAP1	nucleolar and spindle associated protein 1
204444_at	2.67e-20	4e-22	11.7469	39.7165	2.18	KIF11	kinesin family member 11
224428_s_at	3.09e-20	4.73e-22	11.7175	39.5501	2.69	CDCA7	cell division cycle associated 7
210559_s_at	3.71e-20	5.74e-22	11.6837	39.3587	2.33	CDK1	cyclin dependent kinase 1
219306_at	4.01e-20	6.3e-22	11.6673	39.2658	2.05	KIF15	kinesin family member 15
222740_at	4.71e-20	7.49e-22	11.6371	39.0945	2.05	ATAD2	ATPase family, AAA domain containing 2
216548_x_at	4.81e-20	7.68e-22	11.6329	39.0708	2.03	HMGB3P1	high mobility group box 3 pseudogene 1
218663_at	5.2e-20	8.36e-22	11.6179	38.9858	2.01	NCAPG	non-SMC condensin I complex subunit G
203214_x_at	5.36e-20	8.68e-22	11.6114	38.9493	2.07	CDK1	cyclin dependent kinase 1
218755_at	9.72e-20	1.66e-21	11.4985	38.3096	2.17	KIF20A	kinesin family member 20A
202580_x_at	1.09e-19	1.88e-21	11.4768	38.1868	2.26	FOXM1	forkhead box M1
219148_at	1.16e-19	2.01e-21	11.4649	38.119	2.85	PBK	PDZ binding kinase
201890_at	1.27e-19	2.23e-21	11.4466	38.0157	2.77	RRM2	ribonucleotide reductase regulatory subunit M2
213007_at	1.34e-19	2.37e-21	11.4356	37.9535	2.01	FANCI	Fanconi anemia complementation group I
219787_s_at	1.51e-19	2.72e-21	11.4118	37.8185	2.07	ECT2	epithelial cell transforming 2
209642_at	1.64e-19	2.97e-21	11.3963	37.7303	2.48	BUB1	BUB1 mitotic checkpoint serine/threonine kinase
219990_at	1.7e-19	3.12e-21	11.388	37.6837	2	E2F8	E2F transcription factor 8
209773_s_at	2.52e-19	4.76e-21	11.314	37.264	2.95	RRM2	ribonucleotide reductase regulatory subunit M2
204033_at	3.97e-19	7.8e-21	11.2278	36.7758	2.28	TRIP13	thyroid hormone receptor interactor 13
205394_at	5.97e-19	1.2e-20	11.1523	36.3479	2.07	CHEK1	checkpoint kinase 1
200606_at	6.42e-19	1.32e-20	11.1365	36.2584	2.39	DSP	desmoplakin
202589_at	1.16e-18	2.49e-20	11.0249	35.6257	2.27	TYMS	thymidylate synthetase
204580_at	1.32e-18	2.89e-20	10.9988	35.4781	4.07	MMP12	matrix metallopeptidase 12
1554768_a_at	1.92e-18	4.29e-20	10.9303	35.0898	2.31	MAD2L1	MAD2 mitotic arrest deficient-like 1 (yeast)
203819_s_at	2.3e-18	5.23e-20	10.8955	34.8926	2.81	IGF2BP3	insulin like growth factor 2 mRNA binding protein 3
204162_at	3.19e-18	7.46e-20	10.8335	34.5417	2.35	NDC80	NDC80, kinetochore complex component
1552619_a_at	3.87e-18	9.29e-20	10.7952	34.3246	2.21	ANLN	anillin actin binding protein
212344_at	4.63e-18	1.13e-19	10.7607	34.1294	2.05	SULF1	sulfatase 1
242881_x_at	1.02e-17	2.66e-19	10.6113	33.284	2.71	DUXAP10	double homeobox A pseudogene 10
205941_s_at	2.54e-17	7.15e-19	10.4382	32.3054	2.1	COL10A1	collagen type X alpha 1 chain
227452_at	2.68e-17	7.59e-19	10.4278	32.2464	2.08	LINC00673///LINC00511	long intergenic non-protein coding RNA 673///long intergenic non-protein coding RNA 511
203889_at	2.79e-17	7.93e-19	10.4201	32.203	2.95	SCG5	secretogranin V
217428_s_at	3.9e-17	1.14e-18	10.3566	31.8443	2.65	COL10A1	collagen type X alpha 1 chain
225834_at	8.14e-17	2.51e-18	10.2181	31.0624	2.11	FAM72A///FAM72D///FAM72B///FAM72C	family with sequence similarity 72 member A///family with sequence similarity 72 member D///family with sequence similarity 72 member B///family with sequence similarity 72 member C
238617_at	1.28e-16	4.05e-18	10.1342	30.5899	2.03	KIF26B	kinesin family member 26B
212353_at	2.69e-16	8.96e-18	9.99482	29.8047	2.23	SULF1	sulfatase 1
228273_at	4.43e-16	1.54e-17	9.89997	29.2713	2.14	PRR11	proline rich 11
208650_s_at	5.36e-16	1.88e-17	9.86422	29.0704	2.12	CD24	CD24 molecule
204348_s_at	5.86e-16	2.09e-17	9.84593	28.9677	2.06	LOC100507855///AK4	adenylate kinase 4, mitochondrial-like///adenylate kinase 4
203820_s_at	1.46e-15	5.58e-17	9.67283	27.9967	2.5	IGF2BP3	insulin like growth factor 2 mRNA binding protein 3
225601_at	3.51e-15	1.44e-16	9.50584	27.0626	2.2	HMGB3	high mobility group box 3
202311_s_at	5.43e-15	2.3e-16	9.42238	26.5967	2.45	COL1A1	collagen type I alpha 1 chain
235456_at	1.1e-14	4.91e-16	9.28802	25.8482	2.08
223721_s_at	1.56e-14	7.21e-16	9.21973	25.4686	2.38	DNAJC12	DnaJ heat shock protein family (Hsp40) member C12
202310_s_at	2.13e-14	1.02e-15	9.15847	25.1285	2.23	COL1A1	collagen type I alpha 1 chain
218976_at	5.44e-14	2.78e-15	8.97934	24.137	2.61	DNAJC12	DnaJ heat shock protein family (Hsp40) member C12
205229_s_at	8.92e-14	4.75e-15	8.88335	23.6073	2.13	COCH	cochlin
201387_s_at	2.74e-13	1.58e-14	8.66687	22.4181	2.55	UCHL1	ubiquitin C-terminal hydrolase L1
206023_at	4.67e-13	2.8e-14	8.56384	21.8547	2.36	NMU	neuromedin U
223278_at	6.4e-13	3.93e-14	8.5026	21.5207	2.18	GJB2	gap junction protein beta 2
214023_x_at	5.02e-12	3.6e-13	8.09924	19.3382	2.52	TUBB2B	tubulin beta 2B class IIb
242517_at	6.23e-12	4.55e-13	8.05623	19.1075	2.13	KISS1R	KISS1 receptor
205242_at	2.24e-11	1.79e-12	7.80333	17.7589	3.18	CXCL13	C-X-C motif chemokine ligand 13
205549_at	6.12e-11	5.31e-12	7.60054	16.6886	2.59	PCP4	Purkinje cell protein 4
230030_at	7.27e-11	6.38e-12	7.56604	16.5075	2.17	HS6ST2	heparan sulfate 6-O-sulfotransferase 2
220393_at	8.11e-11	7.16e-12	7.54441	16.3942	2.01	LGSN	lengsin, lens protein with glutamine synthetase domain
1552767_a_at	2.31e-10	2.21e-11	7.33188	15.2873	2.3	HS6ST2	heparan sulfate 6-O-sulfotransferase 2
204475_at	6.23e-10	6.41e-11	7.12858	14.2406	2.81	MMP1	matrix metallopeptidase 1
227174_at	6.8e-10	7.04e-11	7.11053	14.1482	2.28	WDR72	WD repeat domain 72
206134_at	1.04e-09	1.11e-10	7.02242	13.699	2.32	ADAMDEC1	ADAM like decysin 1
216623_x_at	2.21e-09	2.5e-10	6.86566	12.9061	2.1	TOX3	TOX high mobility group box family member 3
214774_x_at	2.57e-09	2.94e-10	6.83355	12.7446	2.09	TOX3	TOX high mobility group box family member 3
226086_at	3.25e-09	3.78e-10	6.78455	12.4989	2.05	SYT13	synaptotagmin 13
202831_at	8.04e-09	9.95e-10	6.59385	11.551	2.23	GPX2	glutathione peroxidase 2
209942_x_at	1.83e-08	2.41e-09	6.41713	10.6845	2.64	MAGEA6///MAGEA3	MAGE family member A6///MAGE family member A3
214612_x_at	2.55e-08	3.44e-09	6.34529	10.3356	2.57	MAGEA6	MAGE family member A6
206239_s_at	3.07e-07	5.06e-08	5.79022	7.71312	2.46	SPINK1	serine peptidase inhibitor, Kazal type 1
206561_s_at	5.3e-07	9.13e-08	5.66457	7.13859	2.04	AKR1B10	aldo-keto reductase family 1 member B10
204988_at	1.47e-06	2.77e-07	5.42427	6.06123	2.2	FGB	fibrinogen beta chain
209988_s_at	7.9e-06	1.72e-06	5.01402	4.291	2.22	ASCL1	achaete-scute family bHLH transcription factor 1

## Sheet: Table S7
Table S7. Top 193 upregulated mRNAs in GSE30219 (filtration citeria, p value < 0.05 and LogFC ≥ 2)
ID	adj.P.Val	P.Value	t	B	logFC	Gene.symbol	Gene.title
204580_at	9.37e-14	1.41e-15	8.61665	24.7804	4.73416	MMP12	matrix metallopeptidase 12
204475_at	3.57e-08	1.76e-09	6.28488	11.0546	3.99067	MMP1	matrix metallopeptidase 1
209875_s_at	3.28e-17	2.71e-19	9.89095	33.1872	3.87991	SPP1	secreted phosphoprotein 1
201292_at	1.33e-16	1.2e-18	9.67434	31.7243	3.79722	TOP2A	topoisomerase (DNA) II alpha
222608_s_at	9.78e-16	1.05e-17	9.35526	29.5929	3.66624	ANLN	anillin actin binding protein
201291_s_at	5.92e-15	7.29e-17	9.06627	27.6887	3.61816	TOP2A	topoisomerase (DNA) II alpha
219918_s_at	2.62e-16	2.51e-18	9.5665	31.0007	3.60787	ASPM	abnormal spindle microtubule assembly
218469_at	1.89e-09	6.83e-11	6.86467	14.22	3.54073	GREM1	gremlin 1, DAN family BMP antagonist
203764_at	1.38e-13	2.14e-15	8.55262	24.372	3.52952	DLGAP5	DLG associated protein 5
218468_s_at	3.6e-09	1.39e-10	6.74105	13.5297	3.50227	GREM1	gremlin 1, DAN family BMP antagonist
219148_at	1.31e-11	2.89e-13	7.7787	19.5611	3.46749	PBK	PDZ binding kinase
205242_at	2.84e-08	1.37e-09	6.3313	11.3011	3.46275	CXCL13	C-X-C motif chemokine ligand 13
225681_at	4.71e-23	1.51e-25	11.9189	47.3673	3.37361	CTHRC1	collagen triple helix repeat containing 1
210052_s_at	1.45e-13	2.25e-15	8.54459	24.3208	3.34453	TPX2	TPX2, microtubule nucleation factor
202954_at	5.71e-13	9.81e-15	8.31629	22.8777	3.32727	UBE2C	ubiquitin conjugating enzyme E2 C
214612_x_at	0.00115	0.000227	3.74955	-0.237592	3.31435	MAGEA6	MAGE family member A6
202095_s_at	7.57e-13	1.34e-14	8.26784	22.5739	3.31286	BIRC5	baculoviral IAP repeat containing 5
223062_s_at	9.76e-13	1.76e-14	8.22426	22.3016	3.2514	PSAT1	phosphoserine aminotransferase 1
209942_x_at	0.00168	0.000351	3.63133	-0.646717	3.24949	MAGEA6///MAGEA3	MAGE family member A6///MAGE family member A3
204962_s_at	6.99e-13	1.22e-14	8.28178	22.6612	3.2368	SLC35F6///CENPA	solute carrier family 35 member F6///centromere protein A
206102_at	2.12e-14	2.87e-16	8.85972	26.3441	3.1894	GINS1	GINS complex subunit 1
201890_at	1.81e-14	2.42e-16	8.88542	26.5106	3.18177	RRM2	ribonucleotide reductase regulatory subunit M2
203820_s_at	1.53e-07	8.93e-09	5.98231	9.47913	3.16216	IGF2BP3	insulin like growth factor 2 mRNA binding protein 3
202870_s_at	1.57e-11	3.49e-13	7.7485	19.3784	3.16192	CDC20	cell division cycle 20
223381_at	2.32e-11	5.32e-13	7.67974	18.9639	3.16099	NUF2	NUF2, NDC80 kinetochore complex component
37892_at	7.5e-07	5.29e-08	5.63813	7.75525	3.15794	COL11A1	collagen type XI alpha 1 chain
1555758_a_at	4.1e-13	6.88e-15	8.37149	23.2248	3.14778	CDKN3	cyclin dependent kinase inhibitor 3
204641_at	2.58e-12	5.05e-14	8.05818	21.2704	3.11532	NEK2	NIMA related kinase 2
203755_at	9.71e-15	1.23e-16	8.98729	27.1729	3.10053	BUB1B	BUB1 mitotic checkpoint serine/threonine kinase B
202311_s_at	4.84e-14	6.99e-16	8.72418	25.4696	3.09316	COL1A1	collagen type I alpha 1 chain
202705_at	2.12e-13	3.4e-15	8.48082	23.9158	3.08141	CCNB2	cyclin B2
209773_s_at	2.93e-14	4.05e-16	8.80731	26.0052	3.05842	RRM2	ribonucleotide reductase regulatory subunit M2
204825_at	3.06e-13	5.05e-15	8.4197	23.5289	3.0429	MELK	maternal embryonic leucine zipper kinase
204822_at	7.29e-11	1.91e-12	7.47041	17.7152	3.0381	TTK	TTK protein kinase
202831_at	0.000275	4.3e-05	4.1754	1.3303	3.02844	GPX2	glutathione peroxidase 2
224428_s_at	4.1e-16	4.1e-18	9.49406	30.5165	3.02349	CDCA7	cell division cycle associated 7
225655_at	1.32e-14	1.73e-16	8.93609	26.8396	3.00992	UHRF1	ubiquitin like with PHD and ring finger domains 1
218542_at	6.24e-14	9.15e-16	8.68301	25.2052	3.00487	CEP55	centrosomal protein 55
209714_s_at	1.39e-12	2.58e-14	8.16423	21.9276	2.99426	CDKN3	cyclin dependent kinase inhibitor 3
230030_at	4.57e-08	2.32e-09	6.23448	10.7884	2.96344	HS6ST2	heparan sulfate 6-O-sulfotransferase 2
202503_s_at	6.91e-17	5.87e-19	9.77892	32.429	2.95371	KIAA0101	KIAA0101
217428_s_at	3.53e-08	1.74e-09	6.28676	11.0646	2.94057	COL10A1	collagen type X alpha 1 chain
1552767_a_at	4.63e-08	2.35e-09	6.23183	10.7744	2.93501	HS6ST2	heparan sulfate 6-O-sulfotransferase 2
207828_s_at	7.8e-13	1.38e-14	8.2624	22.5399	2.93323	CENPF	centromere protein F
206561_s_at	0.0027	0.000618	3.47421	-1.17246	2.92483	AKR1B10	aldo-keto reductase family 1 member B10
228729_at	2.19e-14	2.97e-16	8.85419	26.3083	2.90018	CCNB1	cyclin B1
214710_s_at	4.64e-14	6.67e-16	8.73136	25.5157	2.89919	CCNB1	cyclin B1
223229_at	1.82e-16	1.69e-18	9.62478	31.3914	2.89891	UBE2T	ubiquitin conjugating enzyme E2 T
227174_at	0.000273	4.26e-05	4.17761	1.33881	2.88596	WDR72	WD repeat domain 72
222958_s_at	4.17e-11	1.02e-12	7.57411	18.3313	2.861	DEPDC1	DEP domain containing 1
223278_at	0.000179	2.63e-05	4.29534	1.79788	2.84806	GJB2	gap junction protein beta 2
218355_at	7.8e-13	1.38e-14	8.2625	22.5405	2.84752	KIF4A	kinesin family member 4A
203418_at	1.75e-11	3.94e-13	7.72874	19.2591	2.79968	CCNA2	cyclin A2
218009_s_at	3.23e-12	6.42e-14	8.02004	21.0353	2.7982	PRC1	protein regulator of cytokinesis 1
1552619_a_at	3.27e-11	7.8e-13	7.61751	18.5906	2.79528	ANLN	anillin actin binding protein
203967_at	1.9e-11	4.3e-13	7.71438	19.1725	2.78022	CDC6	cell division cycle 6
232278_s_at	5.38e-10	1.7e-11	7.10404	15.5794	2.75689	DEPDC1	DEP domain containing 1
203819_s_at	3.77e-06	3.26e-07	5.27105	6.00112	2.75334	IGF2BP3	insulin like growth factor 2 mRNA binding protein 3
205941_s_at	1.17e-08	5.07e-10	6.51109	12.2674	2.74534	COL10A1	collagen type X alpha 1 chain
218039_at	1.16e-12	2.12e-14	8.19532	22.1211	2.70376	NUSAP1	nucleolar and spindle associated protein 1
208079_s_at	1.16e-14	1.5e-16	8.95761	26.9796	2.70084	AURKA	aurora kinase A
206364_at	8.21e-13	1.46e-14	8.25358	22.4847	2.69982	KIF14	kinesin family member 14
209642_at	6.58e-11	1.7e-12	7.4894	17.8277	2.69974	BUB1	BUB1 mitotic checkpoint serine/threonine kinase
210559_s_at	4.28e-11	1.05e-12	7.56902	18.3009	2.68603	CDK1	cyclin dependent kinase 1
206239_s_at	0.00496	0.00127	3.26535	-1.83897	2.66871	SPINK1	serine peptidase inhibitor, Kazal type 1
218755_at	1.95e-12	3.75e-14	8.10559	21.5637	2.66814	KIF20A	kinesin family member 20A
204444_at	1.41e-12	2.61e-14	8.16252	21.9169	2.66131	KIF11	kinesin family member 11
204162_at	1.66e-09	5.94e-11	6.88887	14.3561	2.65804	NDC80	NDC80, kinetochore complex component
1554768_a_at	3.58e-10	1.09e-11	7.17976	16.0155	2.65006	MAD2L1	MAD2 mitotic arrest deficient-like 1 (yeast)
209125_at	0.0318	0.0121	2.53165	-3.87842	2.64991	KRT6A	keratin 6A
203744_at	1.09e-13	1.65e-15	8.59221	24.6243	2.64072	HMGB3	high mobility group box 3
207165_at	1.82e-12	3.44e-14	8.11901	21.6468	2.64011	HMMR	hyaluronan mediated motility receptor
203214_x_at	2.83e-11	6.62e-13	7.64436	18.7514	2.63978	CDK1	cyclin dependent kinase 1
201250_s_at	4.46e-08	2.26e-09	6.23929	10.8138	2.6394	SLC2A1	solute carrier family 2 member 1
206023_at	4.87e-06	4.36e-07	5.21046	5.72026	2.63687	NMU	neuromedin U
204092_s_at	3.98e-15	4.69e-17	9.13255	28.1231	2.63366	AURKA	aurora kinase A
204026_s_at	5.87e-15	7.2e-17	9.06813	27.7009	2.62516	ZWINT	ZW10 interacting kinetochore protein
223307_at	2.76e-12	5.41e-14	8.04723	21.2028	2.62007	CDCA3	cell division cycle associated 3
205034_at	3.59e-09	1.38e-10	6.7414	13.5316	2.59818	CCNE2	cyclin E2
203362_s_at	7.62e-10	2.49e-11	7.03829	15.2031	2.57199	MAD2L1	MAD2 mitotic arrest deficient-like 1 (yeast)
219787_s_at	1.89e-12	3.6e-14	8.11207	21.6038	2.55138	ECT2	epithelial cell transforming 2
205229_s_at	8.34e-06	7.99e-07	5.08275	5.13662	2.55081	COCH	cochlin
201387_s_at	6.72e-05	8.54e-06	4.55979	2.86793	2.54732	UCHL1	ubiquitin C-terminal hydrolase L1
220651_s_at	1.08e-09	3.63e-11	6.97417	14.8382	2.53908	MCM10	minichromosome maintenance 10 replication initiation factor
204320_at	3.96e-06	3.44e-07	5.25955	5.94762	2.52574	COL11A1	collagen type XI alpha 1 chain
242881_x_at	5.53e-08	2.86e-09	6.1954	10.583	2.52498	DUXAP10	double homeobox A pseudogene 10
236641_at	6.52e-11	1.68e-12	7.49127	17.8388	2.51963	KIF14	kinesin family member 14
203889_at	2.64e-06	2.2e-07	5.35208	6.38057	2.51502	SCG5	secretogranin V
205394_at	2.87e-11	6.76e-13	7.64092	18.7309	2.50959	CHEK1	checkpoint kinase 1
225834_at	2.65e-08	1.26e-09	6.34617	11.3803	2.48332	FAM72A///FAM72D///FAM72B///FAM72C	family with sequence similarity 72 member A///family with sequence similarity 72 member D///family with sequence similarity 72 member B///family with sequence similarity 72 member C
226777_at	1.45e-08	6.45e-10	6.46756	12.0318	2.47823	ADAM12	ADAM metallopeptidase domain 12
218663_at	7.45e-10	2.43e-11	7.04259	15.2276	2.47616	NCAPG	non-SMC condensin I complex subunit G
231771_at	0.00933	0.00271	3.03368	-2.53437	2.47311	GJB6	gap junction protein beta 6
202310_s_at	4.53e-11	1.12e-12	7.55851	18.2383	2.46207	COL1A1	collagen type I alpha 1 chain
1558048_x_at	1.46e-08	6.51e-10	6.46606	12.0237	2.4601
209921_at	8.27e-06	7.91e-07	5.08508	5.14717	2.45709	SLC7A11	solute carrier family 7 member 11
218726_at	5.39e-12	1.11e-13	7.93207	20.495	2.45479	HJURP	Holliday junction recognition protein
218662_s_at	6.09e-11	1.56e-12	7.50399	17.9142	2.4439	NCAPG	non-SMC condensin I complex subunit G
209408_at	1.17e-10	3.22e-12	7.38376	17.2043	2.43496	KIF2C	kinesin family member 2C
211071_s_at	4.47e-06	3.95e-07	5.23091	5.81476	2.42997	MLLT11	myeloid/lymphoid or mixed-lineage leukemia; translocated to, 11
217678_at	2.29e-05	2.5e-06	4.8358	4.04063	2.42522	SLC7A11	solute carrier family 7 member 11
209709_s_at	7.6e-12	1.6e-13	7.87408	20.1407	2.4219	HMMR	hyaluronan mediated motility receptor
202580_x_at	1.64e-09	5.86e-11	6.89119	14.3691	2.40815	FOXM1	forkhead box M1
219978_s_at	4.09e-10	1.25e-11	7.15532	15.8744	2.40454	NUSAP1	nucleolar and spindle associated protein 1
205393_s_at	1.5e-10	4.21e-12	7.33873	16.9401	2.39535	CHEK1	checkpoint kinase 1
202589_at	6.72e-11	1.74e-12	7.48567	17.8056	2.38735	TYMS	thymidylate synthetase
1553413_at	0.000208	3.12e-05	4.25373	1.63441	2.37697	LCAL1	lung cancer associated lncRNA 1
226980_at	1.31e-09	4.53e-11	6.93586	14.6212	2.3736	DEPDC1B	DEP domain containing 1B
212353_at	6.4e-09	2.6e-10	6.63023	12.9177	2.34757	SULF1	sulfatase 1
219990_at	1.88e-12	3.56e-14	8.11359	21.6132	2.34502	E2F8	E2F transcription factor 8
206134_at	3.86e-06	3.34e-07	5.26559	5.9757	2.34214	ADAMDEC1	ADAM like decysin 1
242517_at	4.01e-06	3.5e-07	5.25619	5.932	2.34072	KISS1R	KISS1 receptor
228273_at	6.82e-09	2.79e-10	6.61768	12.8489	2.33565	PRR11	proline rich 11
203358_s_at	3.23e-10	9.71e-12	7.19856	16.1241	2.33003	EZH2	enhancer of zeste 2 polycomb repressive complex 2 subunit
218883_s_at	2.92e-09	1.1e-10	6.78212	13.7581	2.31392	CENPU	centromere protein U
203213_at	4.22e-09	1.64e-10	6.71124	13.3644	2.31044	CDK1	cyclin dependent kinase 1
209464_at	8.43e-10	2.78e-11	7.01999	15.0987	2.30765	AURKB	aurora kinase B
204318_s_at	6.03e-10	1.93e-11	7.08218	15.4541	2.30592	GTSE1	G2 and S-phase expressed 1
222039_at	1.18e-11	2.56e-13	7.79845	19.6808	2.30405	KIF18B	kinesin family member 18B
203968_s_at	1.26e-10	3.47e-12	7.37121	17.1305	2.3032	CDC6	cell division cycle 6
221521_s_at	4.71e-09	1.86e-10	6.68979	13.2458	2.29284	GINS2	GINS complex subunit 2
209891_at	4.51e-08	2.28e-09	6.23732	10.8034	2.289	SPC25	SPC25, NDC80 kinetochore complex component
204709_s_at	2.05e-09	7.44e-11	6.84976	14.1363	2.28879	KIF23	kinesin family member 23
228323_at	1.46e-10	4.07e-12	7.34465	16.9748	2.28788	KNL1	kinetochore scaffold 1
204086_at	0.000163	2.37e-05	4.31965	1.89401	2.28276	PRAME	preferentially expressed antigen in melanoma
213599_at	2.91e-08	1.4e-09	6.32711	11.2788	2.27841	OIP5	Opa interacting protein 5
218782_s_at	3.27e-11	7.77e-13	7.61801	18.5936	2.27701	ATAD2	ATPase family, AAA domain containing 2
219306_at	1.33e-10	3.68e-12	7.36133	17.0725	2.27094	KIF15	kinesin family member 15
205046_at	4.3e-11	1.05e-12	7.56827	18.2965	2.26659	CENPE	centromere protein E
211519_s_at	5.31e-10	1.67e-11	7.10664	15.5943	2.26297	KIF2C	kinesin family member 2C
222740_at	1.06e-12	1.92e-14	8.21109	22.2194	2.24612	ATAD2	ATPase family, AAA domain containing 2
200606_at	2.91e-07	1.84e-08	5.84414	8.77816	2.24568	DSP	desmoplakin
204855_at	0.0144	0.00457	2.86544	-3.00988	2.24295	SERPINB5	serpin family B member 5
213007_at	5.54e-11	1.4e-12	7.5217	18.0193	2.23114	FANCI	Fanconi anemia complementation group I
212344_at	2.12e-09	7.74e-11	6.84287	14.0977	2.2292	SULF1	sulfatase 1
222037_at	2.04e-12	3.92e-14	8.0984	21.5192	2.21648	MCM4	minichromosome maintenance complex component 4
1554696_s_at	1.42e-09	4.99e-11	6.91898	14.5259	2.21624	TYMS	thymidylate synthetase
202094_at	4.3e-10	1.33e-11	7.14566	15.8187	2.21533	BIRC5	baculoviral IAP repeat containing 5
204675_at	4.03e-10	1.23e-11	7.15804	15.8901	2.21462	SRD5A1	steroid 5 alpha-reductase 1
205064_at	0.0426	0.0172	2.40047	-4.19207	2.21336	SPRR1B	small proline rich protein 1B
228956_at	8.34e-05	1.09e-05	4.50304	2.63381	2.213	UGT8	UDP glycosyltransferase 8
229490_s_at	6.27e-12	1.31e-13	7.90666	20.3396	2.20791
1555778_a_at	4.84e-08	2.47e-09	6.22261	10.7259	2.20556	POSTN	periostin
222036_s_at	2.81e-12	5.54e-14	8.04362	21.1806	2.2048	MCM4	minichromosome maintenance complex component 4
228033_at	8.21e-06	7.83e-07	5.08703	5.15602	2.20453	E2F7	E2F transcription factor 7
238617_at	1.27e-13	1.95e-15	8.56662	24.4611	2.2044	KIF26B	kinesin family member 26B
218960_at	4.58e-05	5.49e-06	4.66066	3.28998	2.19991	TMPRSS4	transmembrane protease, serine 4
218796_at	3.11e-07	1.98e-08	5.82998	8.70699	2.19466	FERMT1	fermitin family member 1
224753_at	8.18e-11	2.16e-12	7.44979	17.5933	2.18726	CDCA5	cell division cycle associated 5
204146_at	8.4e-09	3.51e-10	6.57679	12.6251	2.18317	RAD51AP1	RAD51 associated protein 1
206224_at	0.000367	5.99e-05	4.09337	1.017	2.18301	CST1	cystatin SN
214023_x_at	0.00365	0.000879	3.37309	-1.49978	2.17478	TUBB2B	tubulin beta 2B class IIb
201195_s_at	9.68e-09	4.11e-10	6.54869	12.4718	2.17375	SLC7A5	solute carrier family 7 member 5
203554_x_at	1.1e-10	3e-12	7.39515	17.2712	2.17188	PTTG1	pituitary tumor-transforming 1
202107_s_at	1.39e-09	4.85e-11	6.92385	14.5534	2.16041	MCM2	minichromosome maintenance complex component 2
201014_s_at	6.15e-16	6.36e-18	9.42946	30.086	2.15523	PAICS	phosphoribosylaminoimidazole carboxylase; phosphoribosylaminoimidazolesuccinocarboxamide synthase
1554408_a_at	2.26e-11	5.17e-13	7.68452	18.9927	2.15101	TK1	thymidine kinase 1
210467_x_at	0.00372	0.000899	3.36677	-1.51995	2.14924	MAGEA12	MAGE family member A12
212354_at	9.23e-09	3.91e-10	6.55769	12.5208	2.14898	SULF1	sulfatase 1
219555_s_at	8.3e-08	4.52e-09	6.11062	10.1406	2.14806	CENPN	centromere protein N
223642_at	0.000939	0.000179	3.81307	-0.0130062	2.14246	ZIC2	Zic family member 2
60474_at	7.63e-07	5.41e-08	5.6338	7.73407	2.12567	FERMT1	fermitin family member 1
223700_at	5.64e-11	1.43e-12	7.51781	17.9962	2.12026	MND1	meiotic nuclear divisions 1
1555274_a_at	9.69e-13	1.75e-14	8.2255	22.3093	2.11831	EPT1	ethanolaminephosphotransferase 1
213226_at	4.9e-09	1.94e-10	6.68209	13.2033	2.1114	CCNA2	cyclin A2
203145_at	3.63e-10	1.1e-11	7.17721	16.0007	2.1063	SPAG5	sperm associated antigen 5
220892_s_at	8.18e-09	3.39e-10	6.58269	12.6573	2.10436	PSAT1	phosphoserine aminotransferase 1
210334_x_at	7.73e-09	3.2e-10	6.5933	12.7153	2.09671	BIRC5	baculoviral IAP repeat containing 5
1554242_a_at	0.000144	2.05e-05	4.35472	2.03351	2.09329	COCH	cochlin
229802_at	3.98e-08	1.99e-09	6.26267	10.9371	2.08898	WISP1	WNT1 inducible signaling pathway protein 1
211814_s_at	1.04e-06	7.67e-08	5.56447	7.39615	2.08841	CCNE2	cyclin E2
223556_at	1.03e-09	3.47e-11	6.98194	14.8823	2.0871	HELLS	helicase, lymphoid-specific
212022_s_at	5.8e-10	1.84e-11	7.09001	15.4989	2.07958	MKI67	marker of proliferation Ki-67
226456_at	4e-12	8.1e-14	7.98306	20.8078	2.07887	RMI2	RecQ mediated genome instability 2
235609_at	7.31e-10	2.38e-11	7.04606	15.2475	2.06204	BRIP1	BRCA1 interacting protein C-terminal helicase 1
220295_x_at	3.5e-08	1.73e-09	6.28872	11.0749	2.06119	DEPDC1	DEP domain containing 1
1552766_at	8.96e-06	8.66e-07	5.06565	5.05932	2.05716	HS6ST2	heparan sulfate 6-O-sulfotransferase 2
203083_at	6.98e-08	3.71e-09	6.14715	10.3307	2.05486	THBS2	thrombospondin 2
204126_s_at	3.46e-09	1.33e-10	6.74902	13.5739	2.05405	CDC45	cell division cycle 45
228262_at	0.000188	2.78e-05	4.28127	1.74244	2.05253	MAP7D2	MAP7 domain containing 2
212141_at	1.76e-10	5e-12	7.31005	16.7724	2.04649	MCM4	minichromosome maintenance complex component 4
205549_at	0.00197	0.000424	3.57949	-0.822437	2.03822	PCP4	Purkinje cell protein 4
211080_s_at	2.53e-07	1.57e-08	5.87487	8.93302	2.03477	NEK2	NIMA related kinase 2
216548_x_at	2.82e-11	6.58e-13	7.64533	18.7573	2.03091	HMGB3P1	high mobility group box 3 pseudogene 1
225687_at	3.2e-06	2.72e-07	5.3085	6.17596	2.02951	FAM83D	family with sequence similarity 83 member D
227452_at	2.48e-09	9.19e-11	6.813	13.9305	2.0294	LINC00673///LINC00511	long intergenic non-protein coding RNA 673///long intergenic non-protein coding RNA 511
203878_s_at	1.15e-08	4.95e-10	6.51524	12.2899	2.02803	MMP11	matrix metallopeptidase 11
225601_at	5.09e-07	3.44e-08	5.72293	8.17305	2.02333	HMGB3	high mobility group box 3
235456_at	4.02e-06	3.51e-07	5.25571	5.92975	2.02286
210387_at	9.47e-06	9.23e-07	5.05224	4.99887	2.01087	HIST1H2BJ///HIST1H2BG	histone cluster 1, H2bj///histone cluster 1, H2bg
226661_at	2.95e-09	1.11e-10	6.78009	13.7468	2.0093	CDCA2	cell division cycle associated 2
222646_s_at	8.72e-11	2.32e-12	7.43793	17.5233	2.00165	ERO1A	endoplasmic reticulum oxidoreductase 1 alpha
204603_at	6.42e-09	2.61e-10	6.62958	12.9142	2.00021	EXO1	exonuclease 1
